# Supplementary material for: The progesterone antagonist mifepristone/RU486 blocks the negative effect on life span caused by mating in female Drosophila
Source: Aging (Albany NY). 2015 Jan 15;7(1):53–69. doi: 10.18632/aging.100721 (PMC4350324; doi:10.18632/aging.100721)
Supplement: Supplementary file 1 [file aging-07-53-s001.xlsx]

## Sheet: mated
index	gene
107	Ag5r2
30	AttB
27	AttC
91	CG10562
67	CG10591
71	CG1077
96	CG11381
51	CG1139
80	CG11893
106	CG12716
63	CG13063
15	CG13083
14	CG13084
6	CG13113
64	CG13936
1	CG13947
62	CG14110
101	CG14205
108	CG15043
13	CG15155
9	CG15263
83	CG15533
97	CG15570
102	CG15571
100	CG15721
45	CG16926
26	CG1698
22	CG17108
24	CG17571
72	CG1979,Sodh-1
93	CG31041
79	CG31104
78	CG31300
5	CG31926
4	CG31928
50	CG3264
98	CG32642
53	CG33514
48	CG34040
90	CG4009
3	CG43402
49	CG4363
89	CG4702
74	CG5246
32	CG5550
73	CG5724
86	CG6830
87	CG6834
88	CG6908
61	CG6910
16	CG7227
70	CG7298
10	CG7631
43	CG8093
40	CG8785
17	CG9463
18	CG9465
19	CG9466
20	CG9468
46	Cht4
47	Cht9
57	Cp15
59	Cp16
56	Cp18
58	Cp19
69	Cpr72Ec
23	CR43817
81	CR45653
75	Cyp12a5
8	Cyp28a5
21	Cyp4e3
39	Cyp6a14
42	Cyp6a21
31	Cyp6a23
36	Cyp9b2
33	Dpt
34	DptB
29	Dro
103	Femcoat
44	IM23
66	ImpE2
68	Jon65Ai
54	Jon65Aii
55	Jon66Ci
82	Jon99Ciii
84	Jon99Fi
2	Lsp1beta
60	Lsp2
37	Mal-A3
25	Mal-A4
38	Mal-A7
41	Mdr49
28	Mdr50
99	Mur11Da
105	mxc
12	ninaD
94	Obp99b
95	PH4alphaPV
35	Ptr
7	Rh5
92	tobi
76	TotA
77	TotC
11	Ugt36Bc
85	Ugt86Dd
104	vanin-like
65	yellow-g
52	yellow-g2

## Sheet: males
index	gene
45	Acp54A1
112	Act88F
137	AdSL
105	Ama
66	Arc1
40	AttA
41	AttB
113	AttD
98	BobA
85	Brd
123	CecC
20	CG10211
90	CG10226
136	CG10345
86	CG10516
139	CG10553
138	CG10559
140	CG10560
141	CG10562
47	CG10910,CG5084
69	CG10912
106	CG11671
103	CG11796
119	CG11892
120	CG11893
76	CG1246
59	CG12780
87	CG13067
36	CG13321
63	CG13323
64	CG13324
37	CG13325
52	CG13422
84	CG13482
53	CG13510,CG13511,CG42565
121	CG13659
1	CG13947
92	CG14151
104	CG14567
126	CG14661
152	CG15043
51	CG15126
16	CG15282
149	CG15369
6	CG15423
124	CG15533
79	CG15829
21	CG16772
70	CG16926
31	CG16978
33	CG17571
11	CG17633
12	CG18302
127	CG2022
44	CG30090
43	CG30091
93	CG32071
75	CG32302
80	CG32368
10	CG32984
122	CG33346
54	CG3376
81	CG33926
73	CG34040
55	CG34212
89	CG34454
108	CG3999
5	CG42329
95	CG42397
62	CG42782
133	CG42788
65	CG42807,CG42808
3	CG43348
4	CG43349
74	CG4363
135	CG44013,CG44014
78	CG5150
30	CG5322
110	CG5724
68	CG5767
132	CG5999
142	CG6295
130	CG6830
131	CG6908
102	CG7298
107	CG8147
57	CG8708
22	CG9259
25	CG9463
26	CG9465
27	CG9466
28	CG9468
116	CheB93a
117	CheB93b
71	Cht4
100	Cpr72Ec
46	CR44391
18	CR44604
114	Cyp12a5
15	Cyp28a5
111	Cyp313a1
8	Cyp4d21
29	Cyp4e3
60	Cyp6a14
67	Cyp6a21
42	Cyp6a23
118	Cyp6d4
56	Cyp9b2
150	dob
49	Dpt
50	DptB
39	Dro
77	Drs
82	Fad2
32	fon
148	GIIIspla2
134	GlyS
109	GstD2
128	GstZ2
13	hgo
24	Jon25Bi
144	Jon99Cii
125	Jon99Fi
145	Jon99Fii
153	lcs
9	lectin-28C
61	Listericin
2	Lsp1beta
83	Lsp2
58	Mal-A3
34	Mal-A4
38	Mdr50
115	MtnD
94	Muc68E
14	NA
48	NA
19	ninaD
151	Npc1b
143	Obp99b
99	Pdh
147	per
101	PGRP-SB1
72	pirk
91	Prat2
146	Smvt
97	Sox21a
23	tim
88	TpnC73F
35	Tret1-1
129	Ugt35b
17	Ugt36Bc
7	vri
96	Zmynd10

## Sheet: virgin
index	gene
46	CG10345
47	CG10562
16	CG10910,CG5084
39	CG11407
43	CG11893
9	CG13084
54	CG15043
18	CG15065
44	CG15533
48	CG15570
51	CG15571
33	CG16775
6	CG17097
3	CG31926
25	CG3264
49	CG32642
10	CG3604
2	CG43348
26	CG4563
36	CG4757
37	CG5724
45	CG6830
34	CG7298
35	CG8147
53	CR44620
31	CR45754
38	Cyp12a5
7	Cyp28a5
5	Cyp4d21
20	Cyp6a14
21	Cyp6a21
15	Cyp6a23
22	Cyp6a8
19	Cyp9b2
50	Diedel3
28	Drsl3
52	Femcoat
17	IM1
23	IM23
29	Jon66Ci
1	Lsp1beta
30	Lsp2
14	Mdr50
27	Peb
42	Pebp1
11	PGRP-SC1a
12	PGRP-SC1b
13	PGRP-SC2
24	pirk
32	RpL28,snoRNA:Or-CD11a,snoRNA:Or-CD11b
40	TotA
41	TotC
4	TotM
8	Ugt36Bc

## Sheet: comp_treatments
mated	males	virgin	virgin_vs_mated
Ag5r2	Acp54A1	CG10345	dec-1
AttB	Act88F	CG10562	18w
AttC	AdSL	CG10910,CG5084	2mit,CR45109
CG10562	Ama	CG11407	4EHP,Syx1A
CG10591	Arc1	CG11893	7B2
CG1077	AttA	CG13084	a
CG11381	AttB	CG15043	A2bp1
CG1139	AttD	CG15065	a6
CG11893	BobA	CG15533	Aats-glupro
CG12716	Brd	CG15570	aay
CG13063	CecC	CG15571	Abd-B
CG13083	CG10211	CG16775	Abp1
CG13084	CG10226	CG17097	Ac13E
CG13113	CG10345	CG31926	ACC
CG13936	CG10516	CG3264	AcCoAS
CG13947	CG10553	CG32642	Acer
CG14110	CG10559	CG3604	Acf1
CG14205	CG10560	CG43348	Ack
CG15043	CG10562	CG4563	Ack-like
CG15155	CG10910,CG5084	CG4757	Act57B,snoRNA:660
CG15263	CG10912	CG5724	Act79B
CG15533	CG11671	CG6830	Act87E
CG15570	CG11796	CG7298	Act88F
CG15571	CG11892	CG8147	Ada2a,Rpb4
CG15721	CG11893	CR44620	Ada2b
CG16926	CG1246	CR45754	adat
CG1698	CG12780	Cyp12a5	ade5
CG17108	CG13067	Cyp28a5	AdenoK
CG17571	CG13321	Cyp4d21	Adgf-A,Msi
CG1979,Sodh-1	CG13323	Cyp6a14	Adgf-C
CG31041	CG13324	Cyp6a21	Adgf-D
CG31104	CG13325	Cyp6a23	Adk1
CG31300	CG13422	Cyp6a8	Aef1
CG31926	CG13482	Cyp9b2	Afti
CG31928	CG13510,CG13511,CG42565	Diedel3	Ag5r
CG3264	CG13659	Drsl3	Ag5r2
CG32642	CG13947	Femcoat	AGBE
CG33514	CG14151	IM1	ago
CG34040	CG14567	IM23	AGO1
CG4009	CG14661	Jon66Ci	AGO3
CG43402	CG15043	Lsp1beta	AIF,CG7261
CG4363	CG15126	Lsp2	AkhR
CG4702	CG15282	Mdr50	Ald
CG5246	CG15369	Peb	Alh
CG5550	CG15423	Pebp1	Alk
CG5724	CG15533	PGRP-SC1a	alpha-Est1
CG6830	CG15829	PGRP-SC1b	alpha-Est10
CG6834	CG16772	PGRP-SC2	alpha-Est2
CG6908	CG16926	pirk	alpha-Est3
CG6910	CG16978	RpL28,snoRNA:Or-CD11a,snoRNA:Or-CD11b	alpha-Est5
CG7227	CG17571	TotA	alpha-Est7
CG7298	CG17633	TotC	alpha-Est8
CG7631	CG18302	TotM	alpha-Man-I
CG8093	CG2022	Ugt36Bc	alpha-Man-II
CG8785	CG30090		alpha-Man-IIb
CG9463	CG30091		alpha-Spec,dlt
CG9465	CG32071		alphaTry
CG9466	CG32302		alphaTub67C
CG9468	CG32368		alt
Cht4	CG32984		AMPdeam
Cht9	CG33346		Amun
Cp15	CG3376		Amy-d
Cp16	CG33926		Amy-p
Cp18	CG34040		ana
Cp19	CG34212		ana1
Cpr72Ec	CG34454		ana3
CR43817	CG3999		Ance
CR45653	CG42329		Ance-3
Cyp12a5	CG42397		Ance-4
Cyp28a5	CG42782		Ank
Cyp4e3	CG42788		AnxB10
Cyp6a14	CG42807,CG42808		AnxB11
Cyp6a21	CG43348		AnxB9
Cyp6a23	CG43349		aop
Cyp9b2	CG4363		ap
Dpt	CG44013,CG44014		AP-1gamma
DptB	CG5150		AP-2alpha
Dro	CG5322		Apc
Femcoat	CG5724		Apc2
IM23	CG5767		APC4,HP1b
ImpE2	CG5999		Aph-4
Jon65Ai	CG6295		Apoltp
Jon65Aii	CG6830		app
Jon66Ci	CG6908		Appl
Jon99Ciii	CG7298		Aps
Jon99Fi	CG8147		apt
Lsp1beta	CG8708		AQP
Lsp2	CG9259		Arc1
Mal-A3	CG9463		Arc2
Mal-A4	CG9465		aret
Mal-A7	CG9466		arg
Mdr49	CG9468		Argk
Mdr50	CheB93a		ari-1
Mur11Da	CheB93b		ari-2
mxc	Cht4		armi
ninaD	Cpr72Ec		Arp8
Obp99b	CR44391		Arpc2
PH4alphaPV	CR44604		Arpc3B
Ptr	Cyp12a5		arr
Rh5	Cyp28a5		Arr1
tobi	Cyp313a1		Arr2
TotA	Cyp4d21		Ars2
TotC	Cyp4e3		Asap
Ugt36Bc	Cyp6a14		asf1
Ugt86Dd	Cyp6a21		ash1
vanin-like	Cyp6a23		asl
yellow-g	Cyp6d4		asp
yellow-g2	Cyp9b2		Asph
	dob		AstC
	Dpt		asun
	DptB		Asx
	Dro		Atf3
	Drs		Atg1
	Fad2		Atg17
	fon		Atg2
	GIIIspla2		Atg8a
	GlyS		ATP7
	GstD2		att-ORFA,att-ORFB
	GstZ2		AttA
	hgo		AttB
	Jon25Bi		AttC
	Jon99Cii		Atu
	Jon99Fi		Atx2
	Jon99Fii		Atxn7
	lcs		aux
	lectin-28C		Axn
	Listericin		axo
	Lsp1beta		Axud1
	Lsp2		az2
	Mal-A3		b
	Mal-A4		B4
	Mdr50		bab1
	MtnD		bab2
	Muc68E		babo
	NA		babos
	NA		Bace
	ninaD		ball
	Npc1b		Bap170
	Obp99b		Bap60
	Pdh		barr
	per		baz
	PGRP-SB1		bcd,zen
	pirk		bchs
	Prat2		bdg
	Smvt		beat-IIIc
	Sox21a		bel
	tim		beta-Spec
	TpnC73F		betaTry
	Tret1-1		betaTub60D
	Ugt35b		betaTub97EF
	Ugt36Bc		bgcn,wibg
	vri		BI-1
	Zmynd10		bib
			BicD
			bif
			BigH1
			Bin1
			bin3
			bip1
			bip2
			Blimp-1
			Blm
			blot
			blue
			BM-40-SPARC
			bmm
			bnb
			BobA
			boi
			bol
			bon
			bond
			bor
			bora
			botv
			BoYb
			Br140
			brat
			Brca2
			Brd
			Brd8
			Bre1
			brm
			Brms1
			brp
			bru
			bru-3
			Bruce
			BRWD3
			bs
			bsf
			Bsg25D
			bsk
			bt
			BTBD9
			BtbVII
			Btk29A
			btz
			Bub1
			Bub3
			BubR1
			bun
			by
			byn
			c(3)G
			c11.1
			c12.2
			C3G
			ca
			Ca-alpha1D
			Ca-alpha1T
			cac
			cact
			cad
			Cad74A
			Cad87A
			CadN
			Caf1-105
			Caf1-180
			CAH2
			CAHbeta
			cal1
			CalpA
			Cals
			Calx
			Camta
			CanA-14F
			CanA1
			Cand1
			Cap
			Cap-D2
			Cap-G
			Capr
			capu
			CASK,CRG
			Cat
			cathD
			caz
			Cbl
			Cbp20
			Cbp53E
			CCHa1
			Ccp84Ag
			Cct1,Cct2
			Cda4
			CDase
			cdc2
			Cdc27
			cdc2c
			Cdc5
			Cdc6
			Cdep
			CdGAPr
			Cdk12
			Cdk5alpha
			Cdk8
			CecA1
			CecA2
			CecC
			Cen
			Cenp-C
			Cep135
			cer
			Cf2
			Cfp1
			cg
			CG10011
			CG10031
			CG10055
			CG10062
			CG10073
			CG10086
			CG10116
			CG10126
			CG10131
			CG10140
			CG10144
			CG10154
			CG10163
			CG10170
			CG10178
			CG10182
			CG10184
			CG10188
			CG10205
			CG10208
			CG10222
			CG10253
			CG10254
			CG10265
			CG10283
			CG10289
			CG10321
			CG10361
			CG10395
			CG10405
			CG10407
			CG10433
			CG10445
			CG10467,CG10469
			CG10472
			CG10477
			CG10479
			CG10492
			CG10512
			CG10516
			CG10527
			CG10543
			CG10550
			CG10553
			CG10555
			CG10559
			CG10562
			CG10592
			CG10600,CG31752
			CG10621
			CG10623
			CG10631
			CG10650
			CG10657
			CG10659
			CG10660
			CG10672
			CG10680
			CG10702
			CG10725
			CG10732
			CG10737
			CG10738
			CG1077
			CG10777
			CG10799
			CG10814
			CG10830
			CG10866
			CG10910,CG5084
			CG10911
			CG10912
			CG10915
			CG1092
			CG10924
			CG10943
			CG10970,CG44325
			CG10979
			CG11000
			CG11050
			CG11069
			CG11070
			CG11073
			CG11089,CG31381
			CG1109
			CG11122
			CG11138
			CG11148
			CG11149
			CG11151
			CG11155
			CG11162
			CG11164
			CG11168
			CG11178,CR44654
			CG11191
			CG11192
			CG11200,CG13868
			CG11211
			CG11236
			CG1124
			CG11241
			CG11307
			CG11309
			CG11313
			CG11318
			CG11327,Tsp
			CG11329
			CG11334,lox
			CG11340
			CG11353
			CG11367
			CG11378
			CG11381
			CG11388
			CG11395
			CG11399
			CG11400
			CG11417
			CG11425
			CG11426
			CG1143
			CG11459
			CG11486
			CG11504,CG34298
			CG11505
			CG11550
			CG11590
			CG11593
			CG11600
			CG1161
			CG11619
			CG11671
			CG11672
			CG11686
			CG11695
			CG1172
			CG11739
			CG11760,CG8116,CG8136
			CG11791
			CG11796
			CG11825
			CG11841
			CG11842
			CG11851
			CG11852
			CG11873
			CG11876
			CG11878
			CG11893
			CG11897
			CG11899
			CG11902
			CG11911
			CG11951
			CG11961
			CG11970
			CG12012
			CG12018
			CG12057
			CG1208,glob3
			CG12084
			CG12119
			CG1213
			CG12155
			CG12164
			CG12179
			CG12194
			CG12224
			CG12236
			CG12239
			CG12253
			CG12264
			CG12299
			CG12316
			CG12325
			CG1233
			CG12374
			CG1240
			CG1246
			CG12499
			CG12512
			CG12531
			CG12592
			CG12605
			CG12643
			CG12716
			CG12717
			CG12730
			CG12746
			CG12772
			CG12773
			CG12780
			CG12795
			CG12814
			CG12824
			CG12825
			CG12868
			CG12877
			CG12926
			CG12934
			CG12948,CG34409
			CG12963
			CG12974
			CG1299
			CG13001
			CG13012
			CG13025
			CG13026
			CG1304
			CG13049
			CG13063
			CG13067
			CG13077
			CG13078
			CG13091
			CG13102
			CG13113
			CG13114
			CG13124
			CG13142
			CG13159
			CG13177
			CG13185
			CG13215
			CG13252
			CG13255
			CG13280,Cas
			CG13284
			CG13297
			CG13309
			CG13315
			CG13321
			CG13323
			CG13324
			CG13325
			CG13360
			CG13366
			CG13373
			CG13384
			CG13397
			CG13422
			CG13428
			CG13482
			CG13488
			CG13492
			CG13506
			CG13510,CG13511,CG42565
			CG13531
			CG13565
			CG13599
			CG13606
			CG13607
			CG13618
			CG13624
			CG13625
			CG13631
			CG13641
			CG13650
			CG13658
			CG13659
			CG13704
			CG13707
			CG13728
			CG13739,CG13954
			CG13795
			CG13796
			CG13905
			CG13912
			CG13917
			CG13921
			CG13936
			CG13947
			CG1399
			CG13992
			CG14005
			CG14014
			CG14022
			CG14024
			CG14036
			CG14073
			CG14105
			CG14109
			CG14120
			CG14125
			CG14195
			CG14196
			CG14200,Pfrx
			CG14205
			CG14207
			CG14215
			CG14252
			CG14274
			CG14275
			CG14292
			CG14299
			CG14309,CG7675
			CG14322
			CG14400
			CG14401
			CG14408
			CG1441
			CG14411
			CG14438
			CG14439
			CG1444
			CG14440
			CG14441
			CG14442
			CG14446
			CG14464
			CG14478
			CG14495
			CG14516
			CG14535
			CG14562,CG7448
			CG14567
			CG14606
			CG1461
			CG14629
			CG14644
			CG14645
			CG14646
			CG14650
			CG14661
			CG1468
			CG14694
			CG14695
			CG14696
			CG14712
			CG14749
			CG14762
			CG14767
			CG14777,CG14778
			CG14803
			CG14812
			CG14814
			CG14820
			CG14823
			CG14830
			CG14834
			CG14915
			CG14931
			CG14949
			CG14965
			CG14967
			CG14968
			CG14984
			CG14997
			CG15022
			CG15043
			CG15044
			CG15065
			CG15067
			CG15068
			CG15096
			CG15098
			CG15099
			CG15100
			CG15107
			CG15117
			CG15126
			CG15152
			CG15155
			CG1516
			CG15160
			CG15201
			CG15203
			CG15254
			CG15255
			CG15279
			CG15293
			CG15312
			CG15345
			CG15347
			CG15356
			CG15394
			CG15406
			CG15412
			CG15422
			CG15423
			CG15435
			CG15436
			CG15439
			CG1544
			CG15506
			CG1552
			CG15523
			CG15530
			CG15531
			CG15533
			CG15543
			CG15546
			CG15556
			CG15611
			CG15617
			CG15618
			CG15629
			CG15661
			CG1572
			CG15739
			CG15740
			CG15744
			CG15767,CG42699
			CG15771
			CG1578
			CG15784
			CG15817
			CG15818
			CG1582
			CG15820
			CG15829
			CG15879
			CG15894
			CG1607
			CG1620
			CG1622
			CG1636
			CG1648
			CG1657
			CG16704
			CG16711
			CG16712
			CG16713,CG43165
			CG16727
			CG1673
			CG1674
			CG16742
			CG16743
			CG16749
			CG16756
			CG1677,CR44357
			CG16775
			CG16779
			CG1678
			CG16799
			CG16812
			CG16820
			CG16826
			CG16833
			CG16836
			CG16838
			CG16857
			CG16868
			CG16898
			CG16926
			CG1695
			CG16952
			CG16956
			CG16972
			CG16974
			CG16978
			CG1698
			CG16989
			CG17002
			CG17018
			CG1703
			CG17032
			CG17048,CR44206
			CG17075
			CG17078
			CG17107
			CG17108
			CG17124
			CG1718
			CG17186
			CG17190
			CG17192
			CG17224
			CG17233
			CG17239
			CG17244
			CG17278
			CG17323
			CG17360
			CG1737
			CG17377
			CG17494
			CG17508
			CG17544
			CG17549
			CG17560
			CG17562
			CG17571
			CG17574
			CG17597
			CG17612
			CG17633
			CG17646
			CG17672
			CG17681
			CG17715
			CG17739
			CG17777
			CG17778
			CG17829
			CG17834
			CG17839
			CG17855
			CG17928
			CG17999
			CG18004
			CG1806
			CG18067
			CG1809
			CG18095
			CG1812
			CG18135,CG3808
			CG1815
			CG18173
			CG18180
			CG18190
			CG18208
			CG18213
			CG18234
			CG18268,CG3014
			CG18278
			CG18304
			CG18324
			CG18327,CG8323
			CG18404
			CG18480
			CG18493
			CG18507
			CG18528
			CG18547
			CG18609
			CG18619
			CG18622
			CG18744
			CG18745
			CG18746
			CG18747
			CG18748
			CG18754,SPE
			CG18766
			CG18808,Dhc64C
			CG1882
			CG18869
			CG1889
			CG1909
			CG1942
			CG1970
			CG1983
			CG1998
			CG2016
			CG2022
			CG2025
			CG2065
			CG2070
			CG2076,Vago
			CG2129
			CG2135
			CG2137,Cyt-b5
			CG2145
			CG2182
			CG2186
			CG2187
			CG2202
			CG2225
			CG2233
			CG2247
			CG2254
			CG2258
			CG2278,slpr
			CG2321
			CG2469
			CG2519
			Cg25C
			CG2662
			CG2663
			CG2685
			CG2691
			CG2694
			CG2736
			CG2747
			CG2765
			CG2767
			CG2781
			CG2789
			CG2807
			CG2865
			CG2926
			CG2938
			CG2990
			CG30007
			CG30020
			CG30022,sprt
			CG30026
			CG30037,CG33145
			CG30046
			CG30056,fra
			CG30098
			CG30101
			CG30122
			CG30148
			CG30151
			CG30156,vimar
			CG30158
			CG30183
			CG30197
			CG30269,CG30273
			CG30272
			CG30278,Oatp58Da
			CG30289
			CG30344
			CG30345
			CG3036
			CG30377
			CG30389
			CG30413
			CG30421
			CG30424
			CG30427
			CG30440
			CG30467
			CG30486,antr
			CG3088
			CG3091
			CG3097
			CG31013
			CG31030
			CG31041
			CG31086,CG31323
			CG31087
			CG31102
			CG31104
			CG31108,CG31510
			CG31122
			CG31140
			CG31145
			CG31157
			CG31176
			CG31198
			CG31207
			CG31224
			CG31233
			CG31248
			CG31259
			CG31262
			CG31265,CG31269
			CG31272
			CG31288
			CG31300
			CG31313
			CG31324
			CG31326
			CG31342
			CG31343
			CG31365
			CG31368
			CG31407,Mical
			CG31414
			CG31427
			CG31431
			CG31445
			CG31457,hh
			CG31463
			CG31469
			CG31522
			CG31523
			CG3160
			CG31635
			CG31661
			CG31675,CG9338
			CG31676
			CG31678
			CG3168
			CG31681
			CG31688
			CG31697,CG33116
			CG31705
			CG31706
			CG31739
			CG31769
			CG31777
			CG31778
			CG31810
			CG31813
			CG31821
			CG31826,Ku80
			CG31869
			CG31886
			CG31897
			CG31928
			CG31997
			CG31998
			CG32023
			CG32024
			CG32032
			CG32066
			CG3209
			CG32091
			CG32113
			CG3214
			CG32196
			CG32198
			CG32202
			CG32206
			CG32221
			CG32280
			CG32284
			CG32295,Spn
			CG32350
			CG32365
			CG32368
			CG3238
			CG32407
			CG32425
			CG32452
			CG3246
			CG32479
			CG32483
			CG32485
			CG3253
			CG32549
			CG32557
			CG32625
			CG32633
			CG3264
			CG32645
			CG32667
			CG32676
			CG32687
			CG32695
			CG32750
			CG32751
			CG32758
			CG32767
			CG32772
			CG32809
			CG32833,CG32834
			CG3290
			CG3294
			CG32982
			CG33090
			CG33093
			CG33099
			CG33109
			CG33110
			CG33111,eIF4G2
			CG33120
			CG33123
			CG33144
			CG33172
			CG33217
			CG33258
			CG33275
			CG33298
			CG33301
			CG3332
			CG33337
			CG33346
			CG3344
			CG33468,CG33469
			CG33493,CG6463
			CG33494
			CG33509
			CG33510
			CG33511
			CG3356
			CG3368
			CG33695,cana
			CG3394
			CG3397
			CG33970
			CG3402
			CG34043
			CG34054
			CG34056,CG34057
			CG3408
			CG34113
			CG34114
			CG34120
			CG34126
			CG34133
			CG34136
			CG34148,CR45046,fit
			CG34166
			CG34172
			CG34176
			CG34198
			CG34203
			CG34211
			CG34212
			CG34215
			CG34216,tor
			CG34219,CG8248,Spt
			CG34227
			CG34232
			CG34234,fdl
			CG34236
			CG34253,CR32194,CR43253
			CG34256
			CG34279,CG34280,Sur-8
			CG34288
			CG34291
			CG3430
			CG34301
			CG34308,timeout
			CG34324
			CG34325
			CG34347
			CG34362
			CG34371
			CG34383
			CG34384
			CG34394
			CG34401
			CG34408
			CG34422
			CG34423,CG34424,CG9875
			CG34449
			CG34457
			CG3446
			CG3505
			CG3520
			CG3523
			CG3529
			CG3548
			CG3558
			CG3597
			CG3625
			CG3634
			CG3638
			CG3662
			CG3679,CR45485
			CG3680
			CG3690
			CG3699
			CG3726
			CG3731
			CG3744
			CG3764
			CG3815
			CG3819
			CG3823
			CG3829
			CG3835
			CG3841
			CG3847
			CG3868
			CG3902
			CG3906
			CG3907
			CG3921
			CG3961
			CG3964
			CG3987
			CG3999
			CG4000
			CG4009
			CG4019
			CG4020
			CG4036
			CG40485
			CG40486,CR45502
			CG4049
			CG4050
			CG4053
			CG4080
			CG4091
			CG4115,snmRNA:419
			CG4119
			CG4133
			CG4165
			CG4169
			CG42231,chif
			CG42232
			CG42238
			CG42240
			CG42249
			CG42255
			CG42260
			CG42261
			CG42265
			CG42271
			CG42319
			CG42327
			CG42335
			CG42340
			CG42364
			CG4238
			CG42388
			CG42389
			CG42397
			CG42450
			CG42494,Girdin
			CG4250
			CG42521
			CG42524
			CG42541
			CG42575
			CG42588
			CG42593
			CG42637,Gyc76C
			CG42656
			CG4266
			CG42668
			CG42671
			CG42672
			CG42674
			CG42684
			CG42697,GEFmeso
			CG42704
			CG42705
			CG42708
			CG42714
			CG42724
			CG42732
			CG42747
			CG42750
			CG42788
			CG42795
			CG42797
			CG42807,CG42808
			CG42813,CG42814
			CG4282
			CG42830,CadN2
			CG42855,Sik3
			CG4294
			CG4297
			CG4302
			CG43055
			CG4306
			CG43074
			CG43078
			CG43090
			CG43102
			CG43134
			CG43143
			CG43155
			CG43156
			CG43163
			CG43164
			CG43175
			CG43184
			CG43313
			CG43332,CG43333
			CG43342,CG43343
			CG43348
			CG43349
			CG4335
			CG43367
			CG43402
			CG43427
			CG43448
			CG4360
			CG4363
			CG43658
			CG43689
			CG43729
			CG43736
			CG43737
			CG43759
			CG4377
			CG43773,CG43774
			CG43777,tamo
			CG43783,orb2
			CG43867
			CG43901
			CG43921
			CG44006
			CG44013,CG44014
			CG4409
			CG44142
			CG4424
			CG44250,CG44251
			CG44261
			CG44385,Klp10A
			CG44437,sno
			CG4449
			CG4461
			CG4476
			CG44774
			CG44838
			CG4497
			CG45002
			CG45057
			CG45060,CG45061
			CG45076,CG45078,fau
			CG45080
			CG4511
			CG45186
			CG45263
			CG4554
			CG45544
			CG4557
			CG4570
			CG4577
			CG4586
			CG4592
			CG4607
			CG4612
			CG4623
			CG4666
			CG4670
			CG4702
			CG4716
			CG4729
			CG4734
			CG4751
			CG4768
			CG4769
			CG4781
			CG4797
			CG4858
			CG4880
			CG4911
			CG4935
			CG4949
			CG4962
			CG4996
			CG5001
			CG5002
			CG5004
			CG5004
			CG5009
			CG5010
			CG5011
			CG5023
			CG5026
			CG5059
			CG5080
			CG5087
			CG5096,gny
			CG5098
			CG5150
			CG5162
			CG5167
			CG5171
			CG5177
			CG5194
			CG5199
			CG5205
			CG5210
			CG5235
			CG5246
			CG5261
			CG5270
			CG5321
			CG5322
			CG5346
			CG5381
			CG5390
			CG5397
			CG5399
			CG5466
			CG5493
			CG5506
			CG5514
			CG5521
			CG5522
			CG5527
			CG5535
			CG5538,Desat1
			CG5550
			CG5577
			CG5590
			CG5597
			CG5604
			CG5626
			CG5646
			CG5674
			CG5687
			CG5694
			CG5697
			CG5703
			CG5707
			CG5724
			CG5726
			CG5728
			CG5746
			CG5758
			CG5767
			CG5770
			CG5776
			CG5778
			CG5787
			CG5789
			CG5807
			CG5819
			CG5823
			CG5844
			CG5849
			CG5853
			CG5867
			CG5877
			CG5886
			CG5895
			CG5909
			CG5913
			CG5916
			CG5921
			CG5937
			CG5945
			CG5953
			CG5955
			CG5958
			CG5966
			CG5973
			CG5999
			CG6012
			CG6020
			CG6040
			CG6048
			CG6051
			CG6066
			CG6067
			CG6074
			CG6115
			CG6125
			CG6142
			CG6175
			CG6188
			CG6225
			CG6227
			CG6230
			CG6231
			CG6259
			CG6272
			CG6295
			CG6325
			CG6347
			CG6357
			CG6385
			CG6403
			CG6409
			CG6420
			CG6422
			CG6425
			CG6426
			CG6454
			CG6479
			CG6484
			CG6495
			CG6498
			CG6503
			CG6509
			CG6511
			CG6568
			CG6574
			CG6602
			CG6656
			CG6660
			CG6664
			CG6686
			CG6695
			CG6701
			CG6734
			CG6745,CG6765
			CG6762
			CG6763,Cdc16
			CG6791
			CG6836
			CG6839
			CG6841
			CG6845
			CG6870
			CG6891
			CG6908
			CG6923
			CG6927
			CG6933
			CG6945,cp309
			CG6961
			CG6966
			CG6967
			CG6972
			CG7028
			CG7029,Usp12-46
			CG7065
			CG7110
			CG7139
			CG7149
			CG7154
			CG7156
			CG7158
			CG7182
			CG7185,CR45409
			CG7194
			CG7201
			CG7218
			CG7220
			CG7222
			CG7227
			CG7239
			CG7271
			CG7272
			CG7296
			CG7298
			CG7299
			CG7326
			CG7337
			CG7357
			CG7358
			CG7365
			CG7369
			CG7372
			CG7378
			CG7430
			CG7466
			CG7470
			CG7497
			CG7504
			CG7518
			CG7542
			CG7546
			CG7560
			CG7589
			CG7627
			CG7631
			CG7655
			CG7692
			CG7702
			CG7706
			CG7713
			CG7728
			CG7730
			CG7744
			CG7745
			CG7759
			CG7766
			CG7778
			CG7781
			CG7806
			CG7839
			CG7852
			CG7900
			CG7920
			CG7922
			CG7971
			CG7985
			CG7987
			CG8001
			CG8008
			CG8012
			CG8027
			CG8051,snmRNA:763
			CG8060
			CG8066
			CG8083
			CG8089
			CG8093
			CG8108
			CG8129
			CG8147
			CG8173
			CG8176,JHDM2
			CG8177
			CG8180
			CG8184
			CG8188
			CG8202
			CG8206
			CG8223,CR44228
			CG8243
			CG8273
			CG8290
			CG8301
			CG8303
			CG8306
			CG8312
			CG8317
			CG8319
			CG8334
			CG8353,CG8360
			CG8358
			CG8369
			CG8378
			CG8405
			CG8417
			CG8420
			CG8435
			CG8494,CG8503
			CG8516
			CG8520,CG8525
			CG8539
			CG8545
			CG8547
			CG8552
			CG8560
			CG8562
			CG8586
			CG8611
			CG8620
			CG8628
			CG8665
			CG8671
			CG8677,CR45713
			CG8679
			CG8712
			CG8735
			CG8736
			CG8738
			CG8745
			CG8768
			CG8771
			CG8773
			CG8774
			CG8785
			CG8833
			CG8834
			CG8837
			CG8839
			CG8841
			CG8858
			CG8861
			CG8878
			CG8888
			CG8892
			CG8907
			CG8924
			CG8925
			CG8944
			CG8949
			CG8950
			CG8952
			CG8963
			CG9004
			CG9005
			CG9034
			CG9062
			CG9065
			CG9086
			CG9090
			CG9095
			CG9098
			CG9135
			CG9140
			CG9172
			CG9184,CR45166
			CG9203
			CG9246
			CG9259
			CG9279
			CG9286
			CG9312
			CG9323
			CG9328
			CG9331
			CG9336
			CG9350
			CG9360
			CG9372
			CG9380
			CG9394
			CG9411
			CG9413
			CG9416
			CG9425
			CG9426
			CG9436
			CG9444
			CG9447,Spn42Da
			CG9451
			CG9452
			CG9458
			CG9463
			CG9465
			CG9466
			CG9468
			CG9498
			CG9505
			CG9527
			CG9555
			CG9568
			CG9572
			CG9593,nsl1
			CG9609
			CG9616
			CG9626
			CG9631
			CG9636
			CG9641
			CG9646
			CG9649
			CG9673
			CG9674
			CG9689
			CG9691
			CG9692
			CG9702
			CG9705
			CG9715
			CG9717
			CG9727
			CG9743
			CG9747
			CG9759
			CG9776
			CG9795
			CG9812
			CG9813
			CG9825
			CG9836
			CG9902
			CG9914
			CG9915
			CG9925
			CG9926
			CG9928
			CG9932
			CG9934
			CG9940
			CG9941
			CG9990
			CG9993
			Cha,VAChT
			chas
			chb
			Chd1
			Chd3
			Chd64
			CheB38c
			CheB42c,mim
			cher
			CHES-1-like
			chinmo
			CHKov1
			CHKov2
			chm
			Chmp1
			chn
			Chrac-14
			chrb
			Cht3
			Cht4
			Cht5
			Cht8
			Cht9
			ci
			cic
			cid
			cindr
			Cirl
			ck
			Cka
			ckd
			Cks30A
			Claspin
			ClC-a
			ClC-c
			Clect27
			cln3
			Clp
			clu
			cmet
			Cnb
			cnc
			Cngl
			cnk
			cnn
			cno
			Cnot4
			CoIV
			comm2
			Cont
			conu
			CoRest
			corto
			cos
			CoVIII
			Cp15
			Cp190
			cpo
			Cpr100A
			Cpr30B
			Cpr47Ee
			Cpr49Ab
			Cpr49Ae
			Cpr51A
			Cpr62Bb
			Cpr65Ea
			Cpr65Eb
			Cpr66D
			Cpr67B
			Cpr72Ec
			Cpsf160
			CR18228,CR18228-RB,CR18228-RC
			CR18854,CR18854-RB,CR18854-RC
			CR31781
			CR33963,Tis11
			CR42791
			CR42868
			CR43250
			CR43264
			CR43314
			CR43334
			CR43432
			CR43459
			CR43611
			CR43651
			CR43857
			CR43888
			CR43958,Thd1
			CR43963,Smr
			CR44092,mask
			CR44138
			CR44241,Trpm
			CR44392,tweek
			CR44404
			CR44620
			CR44832
			CR44957,mei-9
			CR44999,dm
			CR45033,Hph
			CR45040,Kaz-m1
			CR45054
			CR45102
			CR45168,sti
			CR45204,Imp
			CR45291
			CR45433
			CR45517
			CR45612
			CR45631
			CR45736
			CR45756,Ilp8
			Crag
			crb
			CREG
			crm
			CRMP
			crol
			crp
			Crtc,snmRNA:641
			Csas
			Csk
			Csp
			csul
			csw
			ct
			cta
			CtBP
			CTCF
			Ctf4
			CtsB1
			cu
			Cubn
			Cul1
			Cul5
			cutlet
			cv-2
			cv-c
			cyc
			CycA
			CycB
			CycB3
			CycD
			CycE
			CycT
			CycY
			CYLD
			Cyp12a4
			Cyp12a5
			Cyp12c1
			Cyp12e1
			Cyp18a1
			Cyp28a5
			Cyp28d1
			Cyp305a1
			Cyp309a1,Cyp309a2
			Cyp4ad1
			Cyp4d21
			Cyp4d8
			Cyp4e2
			Cyp4e3
			Cyp4g15
			Cyp4p1
			Cyp6a13
			Cyp6a14
			Cyp6a17
			Cyp6a18
			Cyp6a19
			Cyp6a2
			Cyp6a20
			Cyp6a21
			Cyp6a23
			Cyp6a8
			Cyp6d2
			Cyp6d4
			Cyp6g1
			Cyp6v1
			Cyp9b1
			Cyp9b2
			Cyp9c1
			Cyp9f2
			Cyp9h1
			cype
			Cys
			Cyt-b5-r
			D12
			D19A
			d4
			da
			DAAM
			Dab
			dah
			dalao
			Damm
			dap
			Dap160
			daw
			Dbi
			dbo
			dco
			Dcp2
			Dcr-1
			Dd
			Ddc
			Deaf1
			decay
			Dek
			deltaTry
			Det
			Df31
			Dg
			dgo
			dgt3
			dgt6
			Dh44
			Dhc36C
			Dhc93AB
			dhd
			dia
			Dic1
			didum
			dikar
			Dip-C
			DIP2
			Dip3
			disco
			disco-r
			disp
			Dl
			dlg1
			Dlic
			DLP
			dlp
			dmGlut
			dmpd
			DNA-ligI
			DnaJ-1
			DNApol-alpha180
			DNApol-alpha73
			DNApol-delta
			DNApol-epsilon
			DNApol-eta
			DNaseII
			dnc
			dnk
			dock
			dom,snmRNA:184,snoRNA:Me28S-G2596
			dome
			Dop1R1
			Dop2R
			DOR
			dos
			dp
			Dp1
			dpa
			dpr19
			Dpt
			DptB
			Drak
			Drat
			drd
			dre4
			Dref
			Drep-1
			Drep-2
			Drip
			drm
			Dro
			drosha
			Drs
			Drsl3
			Drsl4
			Drsl5
			Dscam1
			Dscam2
			Dscam4
			dsd
			dsh
			Dtg
			DUBAI
			Duox
			dup
			dwg
			dx
			Dys,snoRNA:Me18S-A1374
			dysc
			E(bx)
			E(Pc)
			E(spl)m7-HLH
			E(spl)mbeta-HLH
			E(var)3-9
			e(y)3
			E23
			E2f
			Eaf
			eag
			ear
			east
			eater
			ebd1
			ebi
			ebo
			eco
			EcR
			ect
			Ect3
			Ect4
			ed
			Edc3
			edl
			Ef1alpha100E
			Efa6
			egg
			egh
			egl
			Egm
			egr
			eIF4G
			eIF5B
			Eip63E
			Eip71CD
			Eip74EF
			Eip75B
			Eip93F
			Ela
			Elba2
[truncated: 1,410 more rows]

## Sheet: virgin_vs_mated
index	gene
3194	dec-1
866	18w
2517	2mit,CR45109
2670	4EHP,Syx1A
1990	7B2
895	a
1476	A2bp1
3124	a6
2667	Aats-glupro
1467	aay
2574	Abd-B
1820	Abp1
3309	Ac13E
996	ACC
1951	AcCoAS
134	Acer
2379	Acf1
1385	Ack
1091	Ack-like
873	Act57B,snoRNA:660
1619	Act79B
2108	Act87E
2132	Act88F
2592	Ada2a,Rpb4
2440	Ada2b
504	adat
3270	ade5
1813	AdenoK
1886	Adgf-A,Msi
2111	Adgf-C
2525	Adgf-D
1803	Adk1
1610	Aef1
2540	Afti
3301	Ag5r
3300	Ag5r2
743	AGBE
1694	ago
1108	AGO1
1632	AGO3
31	AIF,CG7261
403	AkhR
2708	Ald
2418	Alh
1157	Alk
2427	alpha-Est1
2421	alpha-Est10
2018	alpha-Est2
2426	alpha-Est3
2425	alpha-Est5
2424	alpha-Est7
2423	alpha-Est8
3233	alpha-Man-I
2042	alpha-Man-II
2137	alpha-Man-IIb
1659	alpha-Spec,dlt
1050	alphaTry
1472	alphaTub67C
2584	alt
3293	AMPdeam
3256	Amun
810	Amy-d
1168	Amy-p
674	ana
2251	ana1
729	ana3
217	Ance
218	Ance-3
1012	Ance-4
2804	Ank
3395	AnxB10
3325	AnxB11
2204	AnxB9
327	aop
954	ap
2943	AP-1gamma
313	AP-2alpha
2744	Apc
2242	Apc2
2942	APC4,HP1b
2366	Aph-4
153	Apoltp
1805	app
2826	Appl
1789	Aps
912	apt
1095	AQP
1118	Arc1
762	Arc2
199	aret
2825	arg
1766	Argk
3360	ari-1
896	ari-2
1379	armi
3356	Arp8
283	Arpc2
3342	Arpc3B
1102	arr
252	Arr1
1760	Arr2
960	Ars2
1000	Asap
1582	asf1
1922	ash1
2402	asl
2255	asp
788	Asph
473	AstC
2143	asun
764	Asx
3119	Atf3
1810	Atg1
1999	Atg17
1361	Atg2
3239	Atg8a
2991	ATP7
2618	att-ORFA,att-ORFB
768	AttA
769	AttB
749	AttC
1997	Atu
2131	Atx2
35	Atxn7
1972	aux
2347	Axn
1697	axo
34	Axud1
987	az2
216	b
503	B4
1648	bab1
1649	bab2
673	babo
1270	babos
434	Bace
2715	ball
612	Bap170
3277	Bap60
579	barr
3060	baz
2417	bcd,zen
83	bchs
1147	bdg
541	beat-IIIc
2447	bel
3064	beta-Spec
711	betaTry
936	betaTub60D
2738	betaTub97EF
1296	bgcn,wibg
1754	BI-1
160	bib
543	BicD
2987	bif
2122	BigH1
2565	Bin1
609	bin3
1749	bip1
2809	bip2
1401	Blimp-1
2494	Blm
1878	blot
1829	blue
2716	BM-40-SPARC
1835	bmm
3371	bnb
1837	BobA
3137	boi
1768	bol
2194	bon
2222	bond
2566	bor
1570	bora
851	botv
1628	BoYb
978	Br140
266	brat
939	Brca2
1527	Brd
2331	Brd8
1707	Bre1
1848	brm
3273	Brms1
685	brp
581	bru
1821	bru-3
2477	Bruce
2248	BRWD3
937	bs
552	bsf
378	Bsg25D
452	bsk
2799	bt
2960	BTBD9
1365	BtbVII
426	Btk29A
2310	btz
78	Bub1
2757	Bub3
956	BubR1
488	bun
2462	by
1488	byn
2558	c(3)G
3220	c11.1
2949	c12.2
3188	C3G
2340	ca
237	Ca-alpha1D
3173	Ca-alpha1T
3263	cac
531	cact
287	cad
1876	Cad74A
2501	Cad87A
546	CadN
1034	Caf1-105
3210	Caf1-180
1493	CAH2
2034	CAHbeta
2155	cal1
861	CalpA
2820	Cals
2202	Calx
684	Camta
3329	CanA-14F
2365	CanA1
461	Cand1
3330	Cap
2336	Cap-D2
742	Cap-G
1901	Capr
365	capu
2635	CASK,CRG
1575	Cat
994	cathD
3042	caz
1440	Cbl
2168	Cbp20
804	Cbp53E
2530	CCHa1
2015	Ccp84Ag
1345	Cct1,Cct2
3406	Cda4
2357	CDase
462	cdc2
1734	Cdc27
2198	cdc2c
1639	Cdc5
1759	Cdc6
1986	Cdep
576	CdGAPr
1611	Cdk12
458	Cdk5alpha
1779	Cdk8
2351	CecA1
2352	CecA2
2353	CecC
583	Cen
2027	Cenp-C
1528	Cep135
1218	cer
370	Cf2
3219	Cfp1
760	cg
2741	CG10011
360	CG10031
2419	CG10055
859	CG10062
860	CG10073
2019	CG10086
1819	CG10116
2515	CG10126
766	CG10131
1818	CG10140
1723	CG10144
1817	CG10154
1721	CG10163
2656	CG10170
257	CG10178
2657	CG10182
2659	CG10184
573	CG10188
771	CG10205
2663	CG10208
1815	CG10222
1131	CG10253
2661	CG10254
1132	CG10265
553	CG10283
1717	CG10289
887	CG10321
1798	CG10361
604	CG10395
2147	CG10405
2563	CG10407
1255	CG10433
2435	CG10445
1715	CG10467,CG10469
1714	CG10472
1712	CG10477
1711	CG10479
265	CG10492
1608	CG10512
1537	CG10516
1244	CG10527
874	CG10543
2696	CG10550
2699	CG10553
2934	CG10555
2698	CG10559
2700	CG10562
1705	CG10592
560	CG10600,CG31752
563	CG10621
564	CG10623
574	CG10631
566	CG10650
1807	CG10657
578	CG10659
1806	CG10660
1700	CG10672
278	CG10680
567	CG10702
1507	CG10725
1509	CG10732
853	CG10737
1510	CG10738
2006	CG1077
3196	CG10777
747	CG10799
1099	CG10814
2623	CG10830
1685	CG10866
825	CG10910,CG5084
1188	CG10911
1189	CG10912
830	CG10915
1975	CG1092
844	CG10924
1811	CG10943
3211	CG10970,CG44325
2001	CG10979
2002	CG11000
94	CG11050
2260	CG11069
96	CG11070
1261	CG11073
2259	CG11089,CG31381
1998	CG1109
3247	CG11122
3267	CG11138
2816	CG11148
385	CG11149
3015	CG11151
2801	CG11155
3013	CG11162
3012	CG11164
2261	CG11168
3010	CG11178,CR44654
997	CG11191
1229	CG11192
1228	CG11200,CG13868
962	CG11211
98	CG11236
1987	CG1124
1967	CG11241
1613	CG11307
1954	CG11309
2775	CG11313
2781	CG11318
402	CG11327,Tsp
401	CG11329
2784	CG11334,lox
2783	CG11340
1393	CG11353
1625	CG11367
2833	CG11378
2834	CG11381
922	CG11388
813	CG11395
1946	CG11399
811	CG11400
2837	CG11417
1623	CG11425
1622	CG11426
1358	CG1143
2412	CG11459
1364	CG11486
2345	CG11504,CG34298
1370	CG11505
2786	CG11550
3021	CG11590
1688	CG11593
2091	CG11600
1989	CG1161
1910	CG11619
2024	CG11671
2444	CG11672
2102	CG11686
2982	CG11695
1991	CG1172
1979	CG11739
2028	CG11760,CG8116,CG8136
2266	CG11791
1942	CG11796
1033	CG11825
2322	CG11841
2323	CG11842
2268	CG11851
2269	CG11852
2325	CG11873
2326	CG11876
2274	CG11878
2278	CG11893
2329	CG11897
2330	CG11899
2280	CG11902
312	CG11911
2750	CG11951
858	CG11961
2035	CG11970
1378	CG12012
1349	CG12018
2947	CG12057
2003	CG1208,glob3
1656	CG12084
3216	CG12119
2004	CG1213
2925	CG12155
629	CG12164
3152	CG12179
70	CG12194
2504	CG12224
2891	CG12236
2889	CG12239
181	CG12253
194	CG12264
178	CG12299
1840	CG12316
703	CG12325
1330	CG1233
737	CG12374
1360	CG1240
1359	CG1246
2639	CG12499
383	CG12512
3090	CG12531
2065	CG12592
1687	CG12605
3232	CG12643
3274	CG12716
3271	CG12717
2885	CG12730
1995	CG12746
2939	CG12772
3121	CG12773
1005	CG12780
45	CG12795
2475	CG12814
638	CG12824
637	CG12825
1124	CG12868
2311	CG12877
1021	CG12926
699	CG12934
2468	CG12948,CG34409
784	CG12963
1953	CG12974
1386	CG1299
3338	CG13001
3332	CG13012
1868	CG13025
1866	CG13026
3400	CG1304
1855	CG13049
1546	CG13063
1545	CG13067
273	CG13077
272	CG13078
133	CG13091
140	CG13102
150	CG13113
151	CG13114
445	CG13124
174	CG13142
730	CG13159
723	CG13177
1060	CG13185
1042	CG13215
1601	CG13252
1605	CG13255
536	CG13280,Cas
537	CG13284
1716	CG13297
1454	CG13309
1459	CG13315
739	CG13321
1089	CG13323
1090	CG13324
741	CG13325
3113	CG13360
3111	CG13366
2823	CG13373
127	CG13384
431	CG13397
869	CG13422
1231	CG13428
1520	CG13482
891	CG13488
1258	CG13492
900	CG13506
903	CG13510,CG13511,CG42565
1277	CG13531
1297	CG13565
2237	CG13599
2243	CG13606
2671	CG13607
2250	CG13618
2681	CG13624
2682	CG13625
2256	CG13631
2687	CG13641
2692	CG13650
2277	CG13658
2279	CG13659
1395	CG13704
1699	CG13707
1877	CG13728
1019	CG13739,CG13954
414	CG13795
415	CG13796
1338	CG13905
1339	CG13912
1346	CG13917
1347	CG13921
1661	CG13936
10	CG13947
990	CG1399
391	CG13992
386	CG14005
384	CG14014
381	CG14022
379	CG14024
376	CG14036
1906	CG14073
1816	CG14105
1508	CG14109
1502	CG14120
1489	CG14125
3377	CG14195
3378	CG14196
3084	CG14200,Pfrx
3086	CG14205
3087	CG14207
3088	CG14215
2300	CG14252
124	CG14274
123	CG14275
2603	CG14292
2601	CG14299
2596	CG14309,CG7675
2161	CG14322
586	CG14400
587	CG14401
3302	CG14408
1029	CG1441
3028	CG14411
2914	CG14438
2913	CG14439
2927	CG1444
3185	CG14440
2912	CG14441
3184	CG14442
2898	CG14446
602	CG14464
815	CG14478
1186	CG14495
2327	CG14516
418	CG14535
1617	CG14562,CG7448
1961	CG14567
2420	CG14606
3024	CG1461
2832	CG14629
2382	CG14644
1978	CG14645
1981	CG14646
1982	CG14650
2388	CG14661
2951	CG1468
2484	CG14694
2486	CG14695
2487	CG14696
2078	CG14712
662	CG14749
998	CG14762
1010	CG14767
2840	CG14777,CG14778
2842	CG14803
3125	CG14812
3126	CG14814
1415	CG14820
1417	CG14823
1735	CG14830
1739	CG14834
184	CG14915
192	CG14931
1675	CG14949
1678	CG14965
1679	CG14967
1680	CG14968
1686	CG14984
1388	CG14997
1695	CG15022
3365	CG15043
3364	CG15044
837	CG15065
1196	CG15067
1197	CG15068
1207	CG15096
1208	CG15098
1209	CG15099
1210	CG15100
1214	CG15107
1215	CG15117
865	CG15126
253	CG15152
256	CG15155
1027	CG1516
258	CG15160
2970	CG15201
2967	CG15203
523	CG15254
522	CG15255
516	CG15279
511	CG15293
3229	CG15312
3206	CG15345
3207	CG15347
325	CG15356
37	CG15394
43	CG15406
350	CG15412
54	CG15422
55	CG15423
65	CG15435
66	CG15436
367	CG15439
2367	CG1544
2337	CG15506
3245	CG1552
2343	CG15523
2350	CG15530
2768	CG15531
2356	CG15533
2361	CG15543
2779	CG15546
2782	CG15556
809	CG15611
1160	CG15617
3391	CG15618
69	CG15629
1250	CG15661
3253	CG1572
2992	CG15739
3259	CG15740
3003	CG15744
2888	CG15767,CG42699
2887	CG15771
3258	CG1578
2884	CG15784
2332	CG15817
107	CG15818
3244	CG1582
1669	CG15820
1418	CG15829
1668	CG15879
2903	CG15894
2369	CG1607
985	CG1620
3004	CG1622
2933	CG1636
1024	CG1648
2972	CG1657
357	CG16704
1473	CG16711
359	CG16712
358	CG16713,CG43165
2184	CG16727
3005	CG1673
2794	CG1674
871	CG16742
180	CG16743
2458	CG16749
2882	CG16756
3192	CG1677,CR44357
1892	CG16775
2459	CG16779
3404	CG1678
1235	CG16799
205	CG16812
208	CG16820
209	CG16826
182	CG16833
836	CG16836
1544	CG16838
61	CG16857
1227	CG16868
1224	CG16898
1222	CG16926
3099	CG1695
3040	CG16952
502	CG16956
499	CG16972
498	CG16974
496	CG16978
689	CG1698
2830	CG16989
617	CG17002
302	CG17018
2984	CG1703
1536	CG17032
1098	CG17048,CR44206
308	CG17075
309	CG17078
177	CG17107
468	CG17108
469	CG17124
3401	CG1718
2608	CG17186
2611	CG17190
2719	CG17192
344	CG17224
1939	CG17233
330	CG17239
2229	CG17244
2624	CG17278
261	CG17323
2497	CG17360
2973	CG1737
405	CG17377
303	CG17494
605	CG17508
571	CG17544
570	CG17549
2149	CG17560
2148	CG17562
580	CG17571
1086	CG17574
559	CG17597
366	CG17612
155	CG17633
26	CG17646
1503	CG17672
255	CG17681
304	CG17715
726	CG17739
2850	CG17777
2824	CG17778
2827	CG17829
135	CG17834
1525	CG17839
148	CG17855
244	CG17928
1237	CG17999
704	CG18004
2995	CG1806
870	CG18067
687	CG1809
510	CG18095
3101	CG1812
1912	CG18135,CG3808
2375	CG1815
1658	CG18173
1471	CG18180
1211	CG18190
2602	CG18208
2577	CG18213
1899	CG18234
2434	CG18268,CG3014
1100	CG18278
406	CG18304
759	CG18324
758	CG18327,CG8323
2354	CG18404
233	CG18480
2182	CG18493
212	CG18507
2678	CG18528
2503	CG18547
1204	CG18609
166	CG18619
2575	CG18622
2433	CG18744
2430	CG18745
2432	CG18746
2429	CG18747
2431	CG18748
2233	CG18754,SPE
2727	CG18766
1698	CG18808,Dhc64C
640	CG1882
1384	CG18869
2954	CG1889
2796	CG1909
636	CG1942
2811	CG1970
2766	CG1983
3281	CG1998
2389	CG2016
2390	CG2022
3260	CG2025
635	CG2065
634	CG2070
2968	CG2076,Vago
2931	CG2129
2789	CG2135
631	CG2137,Cyt-b5
2965	CG2145
2405	CG2182
2962	CG2186
2787	CG2187
2961	CG2202
598	CG2225
3198	CG2233
3255	CG2247
3201	CG2254
3202	CG2258
3205	CG2278,slpr
2754	CG2321
1341	CG2469
2400	CG2519
73	Cg25C
2858	CG2662
2396	CG2663
3141	CG2685
3286	CG2691
2859	CG2694
1319	CG2736
2439	CG2747
1316	CG2765
2438	CG2767
2436	CG2781
8	CG2789
9	CG2807
3133	CG2865
2401	CG2926
3146	CG2938
2955	CG2990
690	CG30007
705	CG30020
1052	CG30022,sprt
1053	CG30026
1062	CG30037,CG33145
727	CG30046
735	CG30056,fra
1153	CG30098
1170	CG30101
1201	CG30122
1232	CG30148
1230	CG30151
971	CG30156,vimar
616	CG30158
1290	CG30183
765	CG30197
906	CG30269,CG30273
907	CG30272
1266	CG30278,Oatp58Da
1254	CG30289
677	CG30344
678	CG30345
71	CG3036
642	CG30377
1247	CG30389
1281	CG30413
943	CG30421
1317	CG30424
1315	CG30427
952	CG30440
782	CG30467
1085	CG30486,antr
1777	CG3088
3132	CG3091
3166	CG3097
2773	CG31013
2764	CG31030
2756	CG31041
2294	CG31086,CG31323
2697	CG31087
2694	CG31102
2276	CG31104
2693	CG31108,CG31510
2597	CG31122
2238	CG31140
2660	CG31145
2099	CG31157
2633	CG31176
2212	CG31198
2626	CG31207
2599	CG31224
2211	CG31233
2016	CG31248
2026	CG31259
2580	CG31262
2156	CG31265,CG31269
2482	CG31272
2695	CG31288
2275	CG31300
2543	CG31313
2292	CG31324
2533	CG31326
2096	CG31342
2210	CG31343
2650	CG31365
2081	CG31368
2472	CG31407,Mical
2234	CG31414
2751	CG31427
2214	CG31431
2752	CG31445
2651	CG31457,hh
2025	CG31463
2526	CG31469
2385	CG31522
2386	CG31523
3162	CG3160
400	CG31635
24	CG31661
292	CG31675,CG9338
290	CG31676
582	CG31678
3186	CG3168
332	CG31681
284	CG31688
271	CG31697,CG33116
480	CG31705
481	CG31706
246	CG31739
512	CG31769
362	CG31777
361	CG31778
538	CG31810
213	CG31813
527	CG31821
526	CG31826,Ku80
470	CG31869
439	CG31886
131	CG31897
23	CG31928
2805	CG31997
2806	CG31998
1761	CG32023
1453	CG32024
1458	CG32032
1785	CG32066
926	CG3209
1484	CG32091
1498	CG32113
337	CG3214
1897	CG32196
1568	CG32198
1573	CG32202
1917	CG32206
1585	CG32221
1366	CG32280
1368	CG32284
1673	CG32295,Spn
1970	CG32350
1429	CG32365
1430	CG32368
352	CG3238
1405	CG32407
1599	CG32425
1624	CG32452
351	CG3246
1336	CG32479
1646	CG32483
1363	CG32485
930	CG3253
3361	CG32549
3355	CG32557
3290	CG32625
3008	CG32633
1265	CG3264
3002	CG32645
3249	CG32667
3238	CG32676
3235	CG32687
3226	CG32695
3174	CG32750
3175	CG32751
3163	CG32758
3155	CG32767
2875	CG32772
3123	CG32809
1279	CG32833,CG32834
1264	CG3290
68	CG3294
141	CG32982
224	CG33090
2643	CG33093
2642	CG33099
2534	CG33109
2223	CG33110
2665	CG33111,eIF4G2
561	CG33120
353	CG33123
1038	CG33144
3039	CG33172
1630	CG33217
1541	CG33258
1427	CG33275
146	CG33298
162	CG33301
347	CG3332
2658	CG33337
2318	CG33346
1645	CG3344
1125	CG33468,CG33469
1786	CG33493,CG6463
2705	CG33494
592	CG33509
591	CG33510
590	CG33511
933	CG3356
2305	CG3368
188	CG33695,cana
935	CG3394
2505	CG3397
2295	CG33970
1643	CG3402
454	CG34043
1054	CG34054
1337	CG34056,CG34057
1776	CG3408
2409	CG34113
2071	CG34114
3105	CG34120
72	CG34126
2341	CG34133
294	CG34136
2636	CG34148,CR45046,fit
227	CG34166
328	CG34172
53	CG34176
1223	CG34198
1251	CG34203
608	CG34211
959	CG34212
968	CG34215
991	CG34216,tor
1011	CG34219,CG8248,Spt
707	CG34227
1069	CG34232
1075	CG34234,fdl
1105	CG34236
1895	CG34253,CR32194,CR43253
1911	CG34256
2582	CG34279,CG34280,Sur-8
2640	CG34288
2710	CG34291
103	CG3430
2031	CG34301
2101	CG34308,timeout
3282	CG34324
3334	CG34325
2368	CG34347
2315	CG34362
1280	CG34371
2112	CG34383
2020	CG34384
349	CG34394
3076	CG34401
2957	CG34408
3075	CG34422
909	CG34423,CG34424,CG9875
3221	CG34449
798	CG34457
3181	CG3446
2121	CG3505
1284	CG3520
42	CG3523
1468	CG3529
941	CG3548
40	CG3558
333	CG3597
310	CG3625
1948	CG3634
3118	CG3638
12	CG3662
3043	CG3679,CR45485
1604	CG3680
3117	CG3690
3116	CG3699
2892	CG3726
2124	CG3731
2689	CG3744
1870	CG3764
2901	CG3815
1909	CG3819
2902	CG3823
944	CG3829
2848	CG3835
152	CG3841
2905	CG3847
1831	CG3868
1908	CG3902
1286	CG3906
1299	CG3907
50	CG3921
1907	CG3961
52	CG3964
2126	CG3987
2062	CG3999
2620	CG4000
2576	CG4009
1288	CG4019
2890	CG4020
156	CG4036
3408	CG40485
3407	CG40486,CR45502
1301	CG4049
1245	CG4050
2579	CG4053
1774	CG4080
1291	CG4091
2084	CG4115,snmRNA:419
2886	CG4119
5	CG4133
2881	CG4165
1551	CG4169
532	CG42231,chif
2570	CG42232
589	CG42238
2904	CG42240
2969	CG42249
1799	CG42255
1275	CG42260
2287	CG42261
3161	CG42265
3295	CG42271
748	CG42319
2080	CG42327
2213	CG42335
3183	CG42340
888	CG42364
29	CG4238
2941	CG42388
241	CG42389
1801	CG42397
3074	CG42450
1367	CG42494,Girdin
904	CG4250
1784	CG42521
785	CG42524
3145	CG42541
1480	CG42575
1500	CG42588
2930	CG42593
1928	CG42637,Gyc76C
2422	CG42656
1248	CG4266
2191	CG42668
1481	CG42671
883	CG42672
1936	CG42674
3066	CG42684
1199	CG42697,GEFmeso
2921	CG42704
2922	CG42705
1080	CG42708
1720	CG42714
2415	CG42724
1032	CG42732
1413	CG42747
550	CG42750
2551	CG42788
2061	CG42795
2950	CG42797
1104	CG42807,CG42808
2726	CG42813,CG42814
794	CG4282
547	CG42830,CadN2
846	CG42855,Sik3
1272	CG4294
314	CG4297
1249	CG4302
64	CG43055
1898	CG4306
1683	CG43074
1446	CG43078
3176	CG43090
2586	CG43102
2871	CG43134
2063	CG43143
2978	CG43155
3262	CG43156
1758	CG43163
817	CG43164
2160	CG43175
1513	CG43184
3276	CG43313
513	CG43332,CG43333
2219	CG43342,CG43343
18	CG43348
19	CG43349
2615	CG4335
1387	CG43367
22	CG43402
1984	CG43427
2770	CG43448
2614	CG4360
1259	CG4363
3347	CG43658
2869	CG43689
781	CG43729
2918	CG43736
3031	CG43737
3078	CG43759
1260	CG4377
56	CG43773,CG43774
1302	CG43777,tamo
1762	CG43783,orb2
3115	CG43867
2963	CG43901
3266	CG43921
1894	CG44006
2557	CG44013,CG44014
796	CG4409
2518	CG44142
2612	CG4424
1087	CG44250,CG44251
2041	CG44261
3248	CG44385,Klp10A
3278	CG44437,sno
2653	CG4449
1464	CG4461
1460	CG4476
3154	CG44774
1469	CG44838
410	CG4497
3340	CG45002
1858	CG45057
3225	CG45060,CG45061
2483	CG45076,CG45078,fau
2519	CG45080
2069	CG4511
1355	CG45186
2446	CG45263
902	CG4554
2333	CG45544
2917	CG4557
2070	CG4570
16	CG4577
2919	CG4586
159	CG4592
2920	CG4607
1306	CG4612
1397	CG4623
3171	CG4666
1096	CG4670
2507	CG4702
746	CG4716
1861	CG4729
1097	CG4734
186	CG4751
3054	CG4768
1398	CG4769
1308	CG4781
1294	CG4797
1600	CG4858
3055	CG4880
1767	CG4911
238	CG4935
3057	CG4949
1856	CG4962
822	CG4996
17	CG5001
823	CG5002
3058	CG5004
3343	CG5004
824	CG5009
3059	CG5010
20	CG5011
2189	CG5023
1456	CG5026
1944	CG5059
319	CG5080
1457	CG5087
171	CG5096,gny
826	CG5098
1400	CG5150
3061	CG5162
2087	CG5167
105	CG5171
106	CG5177
1765	CG5194
1943	CG5199
2134	CG5205
799	CG5210
1853	CG5235
2157	CG5246
110	CG5261
2077	CG5270
3027	CG5321
464	CG5322
2641	CG5346
459	CG5381
457	CG5390
21	CG5397
2135	CG5399
2195	CG5466
1200	CG5493
1891	CG5506
2313	CG5514
2301	CG5521
800	CG5522
2314	CG5527
1890	CG5535
2090	CG5538,Desat1
801	CG5550
1888	CG5577
2309	CG5590
918	CG5597
455	CG5604
1804	CG5626
2731	CG5646
251	CG5674
1663	CG5687
450	CG5694
2203	CG5697
3063	CG5703
1670	CG5707
2095	CG5724
1192	CG5726
2676	CG5728
2677	CG5746
254	CG5758
1185	CG5767
1184	CG5770
489	CG5776
2637	CG5778
490	CG5787
2680	CG5789
2686	CG5807
897	CG5819
2583	CG5823
2089	CG5844
2209	CG5849
447	CG5853
206	CG5867
3032	CG5877
2284	CG5886
1539	CG5895
2303	CG5909
2286	CG5913
2141	CG5916
2897	CG5921
2896	CG5937
207	CG5945
533	CG5953
1597	CG5955
411	CG5958
2895	CG5966
111	CG5973
2514	CG5999
539	CG6012
1598	CG6020
2178	CG6040
2893	CG6048
2725	CG6051
2724	CG6066
2894	CG6067
2722	CG6074
540	CG6115
2556	CG6125
2293	CG6142
1795	CG6175
2094	CG6188
2093	CG6225
3036	CG6227
476	CG6230
2607	CG6231
1883	CG6259
1791	CG6272
2718	CG6295
2479	CG6325
753	CG6347
754	CG6357
1181	CG6385
2714	CG6403
1788	CG6409
2713	CG6420
2691	CG6422
2712	CG6425
803	CG6426
2249	CG6454
1875	CG6479
1175	CG6484
179	CG6495
1532	CG6498
2709	CG6503
479	CG6509
1450	CG6511
1169	CG6568
2485	CG6574
1411	CG6602
2215	CG6656
2228	CG6660
1871	CG6664
485	CG6686
2254	CG6695
1110	CG6701
486	CG6734
1442	CG6745,CG6765
3067	CG6762
2231	CG6763,Cdc16
2491	CG6791
1579	CG6836
1578	CG6839
1577	CG6841
1325	CG6845
545	CG6870
3073	CG6891
2493	CG6908
2495	CG6923
2874	CG6927
1938	CG6933
1839	CG6945,cp309
3370	CG6961
2550	CG6966
808	CG6967
2226	CG6972
1635	CG7028
2227	CG7029,Usp12-46
2944	CG7065
210	CG7110
1963	CG7139
416	CG7149
115	CG7154
2591	CG7156
1960	CG7158
1756	CG7182
1755	CG7185,CR45409
1753	CG7194
1752	CG7201
2589	CG7218
700	CG7220
702	CG7222
419	CG7227
82	CG7239
1569	CG7271
1530	CG7272
467	CG7296
1937	CG7298
466	CG7299
3372	CG7326
27	CG7337
2587	CG7357
3373	CG7358
1935	CG7365
1626	CG7369
1534	CG7372
3077	CG7378
1565	CG7430
119	CG7466
1618	CG7470
1564	CG7497
1750	CG7504
2097	CG7518
1563	CG7542
1426	CG7546
1482	CG7560
1561	CG7589
428	CG7627
232	CG7631
2162	CG7655
1560	CG7692
2171	CG7702
2172	CG7706
2164	CG7713
1556	CG7728
1558	CG7730
863	CG7744
709	CG7745
715	CG7759
3212	CG7766
125	CG7778
427	CG7781
122	CG7806
1479	CG7839
1344	CG7852
2022	CG7900
2762	CG7920
2208	CG7922
1657	CG7971
2169	CG7985
2546	CG7987
1348	CG8001
1014	CG8008
1435	CG8012
1016	CG8027
3380	CG8051,snmRNA:763
1152	CG8060
2544	CG8066
675	CG8083
1133	CG8089
1135	CG8093
1475	CG8108
2040	CG8129
2044	CG8147
3353	CG8173
2045	CG8176,JHDM2
1474	CG8177
1140	CG8180
3037	CG8184
3352	CG8188
2029	CG8202
3038	CG8206
2030	CG8223,CR44228
671	CG8243
2046	CG8273
719	CG8290
2047	CG8301
1156	CG8303
1155	CG8306
2048	CG8312
1154	CG8317
2049	CG8319
1588	CG8334
121	CG8353,CG8360
2051	CG8358
2032	CG8369
722	CG8378
787	CG8405
2054	CG8417
2037	CG8420
1149	CG8435
761	CG8494,CG8503
2055	CG8516
733	CG8520,CG8525
1745	CG8539
734	CG8545
1115	CG8547
425	CG8552
1743	CG8560
1425	CG8562
1009	CG8586
3346	CG8611
1421	CG8620
1419	CG8628
300	CG8665
299	CG8671
297	CG8677,CR45713
594	CG8679
999	CG8712
1008	CG8735
1007	CG8736
664	CG8738
1822	CG8745
1083	CG8768
1081	CG8771
2104	CG8773
2105	CG8774
1078	CG8785
1825	CG8833
1073	CG8834
44	CG8837
1072	CG8839
1071	CG8841
1070	CG8858
2457	CG8861
1067	CG8878
1065	CG8888
374	CG8892
2152	CG8907
3041	CG8924
2142	CG8925
3312	CG8944
3341	CG8949
1166	CG8950
3313	CG8952
1164	CG8963
1354	CG9004
1058	CG9005
3214	CG9034
1045	CG9062
3303	CG9065
3339	CG9086
1226	CG9090
3304	CG9095
394	CG9098
86	CG9135
395	CG9140
3318	CG9172
1654	CG9184,CR45166
3308	CG9203
295	CG9246
293	CG9259
1920	CG9279
2115	CG9286
2113	CG9312
584	CG9323
288	CG9328
289	CG9331
291	CG9336
876	CG9350
3257	CG9360
1581	CG9372
1322	CG9380
878	CG9394
3296	CG9411
3297	CG9413
1216	CG9416
1524	CG9425
500	CG9426
966	CG9436
2465	CG9444
969	CG9447,Spn42Da
1918	CG9451
1919	CG9452
2471	CG9458
435	CG9463
436	CG9465
437	CG9466
438	CG9468
397	CG9498
89	CG9505
398	CG9527
138	CG9555
139	CG9568
3093	CG9572
2136	CG9593,nsl1
3335	CG9609
2537	CG9616
2445	CG9626
2536	CG9631
2441	CG9636
341	CG9641
806	CG9646
2532	CG9649
3333	CG9673
1869	CG9674
2952	CG9689
2953	CG9691
1865	CG9692
2360	CG9702
1553	CG9705
1554	CG9715
2772	CG9717
2416	CG9727
2769	CG9743
2767	CG9747
2522	CG9759
2383	CG9776
1977	CG9795
1285	CG9812
2520	CG9813
908	CG9825
2449	CG9836
3327	CG9902
3323	CG9914
3324	CG9915
2528	CG9925
2527	CG9926
495	CG9928
494	CG9932
493	CG9934
3287	CG9940
3288	CG9941
2319	CG9990
1238	CG9993
2173	Cha,VAChT
3351	chas
1607	chb
342	Chd1
1580	Chd3
1690	Chd64
585	CheB38c
970	CheB42c,mim
2578	cher
3193	CHES-1-like
25	chinmo
2701	CHKov1
2702	CHKov2
108	chm
1903	Chmp1
777	chn
129	Chrac-14
1483	chrb
599	Cht3
1242	Cht4
2114	Cht5
877	Cht8
1243	Cht9
2803	ci
2190	cic
750	cid
2363	cindr
661	Cirl
518	ck
118	Cka
1371	ckd
144	Cks30A
1391	Claspin
2499	ClC-a
1542	ClC-c
369	Clect27
1887	cln3
11	Clp
790	clu
478	cmet
1352	Cnb
2652	cnc
3305	Cngl
1171	cnk
1101	cnn
2392	cno
173	Cnot4
277	CoIV
1843	comm2
1980	Cont
601	conu
3085	CoRest
2391	corto
980	cos
1957	CoVIII
1451	Cp15
2554	Cp190
2165	cpo
2364	Cpr100A
149	Cpr30B
708	Cpr47Ee
731	Cpr49Ab
732	Cpr49Ae
1121	Cpr51A
1660	Cpr62Bb
1731	Cpr65Ea
1732	Cpr65Eb
1448	Cpr66D
1466	Cpr67B
1859	Cpr72Ec
1120	Cpsf160
2442	CR18228,CR18228-RB,CR18228-RC
443	CR18854,CR18854-RB,CR18854-RC
248	CR31781
2999	CR33963,Tis11
235	CR42791
905	CR42868
1873	CR43250
3168	CR43264
484	CR43314
1333	CR43334
1838	CR43432
2059	CR43459
965	CR43611
686	CR43651
109	CR43857
1614	CR43888
2810	CR43958,Thd1
3269	CR43963,Smr
2244	CR44092,mask
2107	CR44138
1137	CR44241,Trpm
249	CR44392,tweek
821	CR44404
3280	CR44620
3167	CR44832
3150	CR44957,mei-9
2865	CR44999,dm
1988	CR45033,Hph
2289	CR45040,Kaz-m1
2058	CR45054
2867	CR45102
1808	CR45168,sti
3240	CR45204,Imp
377	CR45291
1587	CR45433
2883	CR45517
3108	CR45612
2146	CR45631
1971	CR45736
1872	CR45756,Ilp8
2938	Crag
2247	crb
2581	CREG
3142	crm
1996	CRMP
482	crol
529	crp
1885	Crtc,snmRNA:641
1934	Csas
2492	Csk
1621	Csp
791	csul
2847	csw
2923	ct
305	cta
2098	CtBP
1740	CTCF
1111	Ctf4
3291	CtsB1
2074	cu
3223	Cubn
643	Cul1
2746	Cul5
363	cutlet
1252	cv-2
2541	cv-c
1930	cyc
1800	CycA
1276	CycB
2688	CycB3
3316	CycD
524	CycE
1881	CycT
483	CycY
456	CYLD
2180	Cyp12a4
2179	Cyp12a5
1904	Cyp12c1
2067	Cyp12e1
3369	Cyp18a1
220	Cyp28a5
77	Cyp28d1
1929	Cyp305a1
334	Cyp309a1,Cyp309a2
1001	Cyp4ad1
112	Cyp4d21
1744	Cyp4d8
654	Cyp4e2
442	Cyp4e3
2979	Cyp4g15
680	Cyp4p1
659	Cyp6a13
1006	Cyp6a14
772	Cyp6a17
2306	Cyp6a18
774	Cyp6a19
967	Cyp6a2
775	Cyp6a20
1129	Cyp6a21
773	Cyp6a23
1130	Cyp6a8
1274	Cyp6d2
2225	Cyp6d4
725	Cyp6g1
3102	Cyp6v1
974	Cyp9b1
975	Cyp9b2
942	Cyp9c1
2510	Cyp9f2
1084	Cyp9h1
79	cype
2545	Cys
535	Cyt-b5-r
432	D12
1718	D19A
603	d4
172	da
3120	DAAM
1552	Dab
3035	dah
2945	dalao
1059	Damm
688	dap
593	Dap160
38	daw
1420	Dbi
1535	dbo
2780	dco
1845	Dcp2
2646	Dcr-1
3402	Dd
568	Ddc
1584	Deaf1
2571	decay
802	Dek
712	deltaTry
2158	Det
597	Df31
1148	Dg
1040	dgo
1240	dgt3
2748	dgt6
2050	Dh44
250	Dhc36C
2625	Dhc93AB
2879	dhd
286	dia
2106	Dic1
630	didum
1727	dikar
2511	Dip-C
1637	DIP2
828	Dip3
3322	disco
3321	disco-r
2408	disp
2605	Dl
2975	dlg1
2971	Dlic
92	DLP
1521	dlp
196	dmGlut
694	dmpd
919	DNA-ligI
1706	DnaJ-1
2632	DNApol-alpha180
2304	DNApol-alpha73
1849	DNApol-delta
2232	DNApol-epsilon
1962	DNApol-eta
2166	DNaseII
2864	dnc
2176	dnk
13	dock
884	dom,snmRNA:184,snoRNA:Me28S-G2596
3386	dome
2531	Dop1R1
3392	Dop2R
1392	DOR
1356	dos
368	dp
843	Dp1
986	dpa
170	dpr19
848	Dpt
849	DptB
2980	Drak
989	Drat
3030	drd
1662	dre4
448	Dref
721	Drep-1
681	Drep-2
1055	Drip
49	drm
767	Dro
644	drosha
1377	Drs
1372	Drsl3
1373	Drsl4
1374	Drsl5
979	Dscam1
1733	Dscam2
1436	Dscam4
2733	dsd
2974	dsh
2092	Dtg
1074	DUBAI
338	Duox
1139	dup
2862	dwg
2907	dx
2183	Dys,snoRNA:Me18S-A1374
1823	dysc
1636	E(bx)
716	E(Pc)
2290	E(spl)m7-HLH
2707	E(spl)mbeta-HLH
2451	E(var)3-9
3384	e(y)3
348	E23
2631	E2f
981	Eaf
3029	eag
2129	ear
2846	east
2721	eater
1644	ebd1
4	ebi
3110	ebo
1738	eco
961	EcR
1782	ect
2082	Ect3
1432	Ect4
57	ed
1880	Edc3
1202	edl
2377	Ef1alpha100E
2224	Efa6
1312	egg
2855	egh
1292	egl
1057	Egm
693	egr
2818	eIF4G
1682	eIF5B
1380	Eip63E
1531	Eip71CD
1882	Eip74EF
1893	Eip75B
2216	Eip93F
2258	Ela
36	Elba2
[truncated: 1,410 more rows]

## Sheet: comp_treatments_v2
mated	males	virgin	virgin_vs_mated
Ag5r2	Acp54A1	CG10345	dec-1
AttB	Act88F	CG10562	18w
AttC	AdSL	CG10910,CG5084	2mit,CR45109
CG10562	Ama	CG11407	4EHP,Syx1A
CG10591	Arc1	CG11893	7B2
CG1077	AttA	CG13084	a
CG11381	AttB	CG15043	A2bp1
CG1139	AttD	CG15065	a6
CG11893	BobA	CG15533	Aats-glupro
CG12716	Brd	CG15570	aay
CG13063	CecC	CG15571	Abd-B
CG13083	CG10211	CG16775	Abp1
CG13084	CG10226	CG17097	Ac13E
CG13113	CG10345	CG31926	ACC
CG13936	CG10516	CG3264	AcCoAS
CG13947	CG10553	CG32642	Acer
CG14110	CG10559	CG3604	Acf1
CG14205	CG10560	CG43348	Ack
CG15043	CG10562	CG4563	Ack-like
CG15155	CG10910,CG5084	CG4757	Act57B,snoRNA:660
CG15263	CG10912	CG5724	Act79B
CG15533	CG11671	CG6830	Act87E
CG15570	CG11796	CG7298	Act88F
CG15571	CG11892	CG8147	Ada2a,Rpb4
CG15721	CG11893	CR44620	Ada2b
CG16926	CG1246	CR45754	adat
CG1698	CG12780	Cyp12a5	ade5
CG17108	CG13067	Cyp28a5	AdenoK
CG17571	CG13321	Cyp4d21	Adgf-A,Msi
CG1979,Sodh-1	CG13323	Cyp6a14	Adgf-C
CG31041	CG13324	Cyp6a21	Adgf-D
CG31104	CG13325	Cyp6a23	Adk1
CG31300	CG13422	Cyp6a8	Aef1
CG31926	CG13482	Cyp9b2	Afti
CG31928	CG13510,CG13511,CG42565	Diedel3	Ag5r
CG3264	CG13659	Drsl3	Ag5r2
CG32642	CG13947	Femcoat	AGBE
CG33514	CG14151	IM1	ago
CG34040	CG14567	IM23	AGO1
CG4009	CG14661	Jon66Ci	AGO3
CG43402	CG15043	Lsp1beta	AIF,CG7261
CG4363	CG15126	Lsp2	AkhR
CG4702	CG15282	Mdr50	Ald
CG5246	CG15369	Peb	Alh
CG5550	CG15423	Pebp1	Alk
CG5724	CG15533	PGRP-SC1a	alpha-Est1
CG6830	CG15829	PGRP-SC1b	alpha-Est10
CG6834	CG16772	PGRP-SC2	alpha-Est2
CG6908	CG16926	pirk	alpha-Est3
CG6910	CG16978	RpL28,snoRNA:Or-CD11a,snoRNA:Or-CD11b	alpha-Est5
CG7227	CG17571	TotA	alpha-Est7
CG7298	CG17633	TotC	alpha-Est8
CG7631	CG18302	TotM	alpha-Man-I
CG8093	CG2022	Ugt36Bc	alpha-Man-II
CG8785	CG30090		alpha-Man-IIb
CG9463	CG30091		alpha-Spec,dlt
CG9465	CG32071		alphaTry
CG9466	CG32302		alphaTub67C
CG9468	CG32368		alt
Cht4	CG32984		AMPdeam
Cht9	CG33346		Amun
Cp15	CG3376		Amy-d
Cp16	CG33926		Amy-p
Cp18	CG34040		ana
Cp19	CG34212		ana1
Cpr72Ec	CG34454		ana3
CR43817	CG3999		Ance
CR45653	CG42329		Ance-3
Cyp12a5	CG42397		Ance-4
Cyp28a5	CG42782		Ank
Cyp4e3	CG42788		AnxB10
Cyp6a14	CG42807,CG42808		AnxB11
Cyp6a21	CG43348		AnxB9
Cyp6a23	CG43349		aop
Cyp9b2	CG4363		ap
Dpt	CG44013,CG44014		AP-1gamma
DptB	CG5150		AP-2alpha
Dro	CG5322		Apc
Femcoat	CG5724		Apc2
IM23	CG5767		APC4,HP1b
ImpE2	CG5999		Aph-4
Jon65Ai	CG6295		Apoltp
Jon65Aii	CG6830		app
Jon66Ci	CG6908		Appl
Jon99Ciii	CG7298		Aps
Jon99Fi	CG8147		apt
Lsp1beta	CG8708		AQP
Lsp2	CG9259		Arc1
Mal-A3	CG9463		Arc2
Mal-A4	CG9465		aret
Mal-A7	CG9466		arg
Mdr49	CG9468		Argk
Mdr50	CheB93a		ari-1
Mur11Da	CheB93b		ari-2
mxc	Cht4		armi
ninaD	Cpr72Ec		Arp8
Obp99b	CR44391		Arpc2
PH4alphaPV	CR44604		Arpc3B
Ptr	Cyp12a5		arr
Rh5	Cyp28a5		Arr1
tobi	Cyp313a1		Arr2
TotA	Cyp4d21		Ars2
TotC	Cyp4e3		Asap
Ugt36Bc	Cyp6a14		asf1
Ugt86Dd	Cyp6a21		ash1
vanin-like	Cyp6a23		asl
yellow-g	Cyp6d4		asp
yellow-g2	Cyp9b2		Asph
	dob		AstC
	Dpt		asun
	DptB		Asx
	Dro		Atf3
	Drs		Atg1
	Fad2		Atg17
	fon		Atg2
	GIIIspla2		Atg8a
	GlyS		ATP7
	GstD2		att-ORFA,att-ORFB
	GstZ2		AttA
	hgo		AttB
	Jon25Bi		AttC
	Jon99Cii		Atu
	Jon99Fi		Atx2
	Jon99Fii		Atxn7
	lcs		aux
	lectin-28C		Axn
	Listericin		axo
	Lsp1beta		Axud1
	Lsp2		az2
	Mal-A3		b
	Mal-A4		B4
	Mdr50		bab1
	MtnD		bab2
	Muc68E		babo
	NA		babos
	NA		Bace
	ninaD		ball
	Npc1b		Bap170
	Obp99b		Bap60
	Pdh		barr
	per		baz
	PGRP-SB1		bcd,zen
	pirk		bchs
	Prat2		bdg
	Smvt		beat-IIIc
	Sox21a		bel
	tim		beta-Spec
	TpnC73F		betaTry
	Tret1-1		betaTub60D
	Ugt35b		betaTub97EF
	Ugt36Bc		bgcn,wibg
	vri		BI-1
	Zmynd10		bib
			BicD
			bif
			BigH1
			Bin1
			bin3
			bip1
			bip2
			Blimp-1
			Blm
			blot
			blue
			BM-40-SPARC
			bmm
			bnb
			BobA
			boi
			bol
			bon
			bond
			bor
			bora
			botv
			BoYb
			Br140
			brat
			Brca2
			Brd
			Brd8
			Bre1
			brm
			Brms1
			brp
			bru
			bru-3
			Bruce
			BRWD3
			bs
			bsf
			Bsg25D
			bsk
			bt
			BTBD9
			BtbVII
			Btk29A
			btz
			Bub1
			Bub3
			BubR1
			bun
			by
			byn
			c(3)G
			c11.1
			c12.2
			C3G
			ca
			Ca-alpha1D
			Ca-alpha1T
			cac
			cact
			cad
			Cad74A
			Cad87A
			CadN
			Caf1-105
			Caf1-180
			CAH2
			CAHbeta
			cal1
			CalpA
			Cals
			Calx
			Camta
			CanA-14F
			CanA1
			Cand1
			Cap
			Cap-D2
			Cap-G
			Capr
			capu
			CASK,CRG
			Cat
			cathD
			caz
			Cbl
			Cbp20
			Cbp53E
			CCHa1
			Ccp84Ag
			Cct1,Cct2
			Cda4
			CDase
			cdc2
			Cdc27
			cdc2c
			Cdc5
			Cdc6
			Cdep
			CdGAPr
			Cdk12
			Cdk5alpha
			Cdk8
			CecA1
			CecA2
			CecC
			Cen
			Cenp-C
			Cep135
			cer
			Cf2
			Cfp1
			cg
			CG10011
			CG10031
			CG10055
			CG10062
			CG10073
			CG10086
			CG10116
			CG10126
			CG10131
			CG10140
			CG10144
			CG10154
			CG10163
			CG10170
			CG10178
			CG10182
			CG10184
			CG10188
			CG10205
			CG10208
			CG10222
			CG10253
			CG10254
			CG10265
			CG10283
			CG10289
			CG10321
			CG10361
			CG10395
			CG10405
			CG10407
			CG10433
			CG10445
			CG10467,CG10469
			CG10472
			CG10477
			CG10479
			CG10492
			CG10512
			CG10516
			CG10527
			CG10543
			CG10550
			CG10553
			CG10555
			CG10559
			CG10562
			CG10592
			CG10600,CG31752
			CG10621
			CG10623
			CG10631
			CG10650
			CG10657
			CG10659
			CG10660
			CG10672
			CG10680
			CG10702
			CG10725
			CG10732
			CG10737
			CG10738
			CG1077
			CG10777
			CG10799
			CG10814
			CG10830
			CG10866
			CG10910,CG5084
			CG10911
			CG10912
			CG10915
			CG1092
			CG10924
			CG10943
			CG10970,CG44325
			CG10979
			CG11000
			CG11050
			CG11069
			CG11070
			CG11073
			CG11089,CG31381
			CG1109
			CG11122
			CG11138
			CG11148
			CG11149
			CG11151
			CG11155
			CG11162
			CG11164
			CG11168
			CG11178,CR44654
			CG11191
			CG11192
			CG11200,CG13868
			CG11211
			CG11236
			CG1124
			CG11241
			CG11307
			CG11309
			CG11313
			CG11318
			CG11327,Tsp
			CG11329
			CG11334,lox
			CG11340
			CG11353
			CG11367
			CG11378
			CG11381
			CG11388
			CG11395
			CG11399
			CG11400
			CG11417
			CG11425
			CG11426
			CG1143
			CG11459
			CG11486
			CG11504,CG34298
			CG11505
			CG11550
			CG11590
			CG11593
			CG11600
			CG1161
			CG11619
			CG11671
			CG11672
			CG11686
			CG11695
			CG1172
			CG11739
			CG11760,CG8116,CG8136
			CG11791
			CG11796
			CG11825
			CG11841
			CG11842
			CG11851
			CG11852
			CG11873
			CG11876
			CG11878
			CG11893
			CG11897
			CG11899
			CG11902
			CG11911
			CG11951
			CG11961
			CG11970
			CG12012
			CG12018
			CG12057
			CG1208,glob3
			CG12084
			CG12119
			CG1213
			CG12155
			CG12164
			CG12179
			CG12194
			CG12224
			CG12236
			CG12239
			CG12253
			CG12264
			CG12299
			CG12316
			CG12325
			CG1233
			CG12374
			CG1240
			CG1246
			CG12499
			CG12512
			CG12531
			CG12592
			CG12605
			CG12643
			CG12716
			CG12717
			CG12730
			CG12746
			CG12772
			CG12773
			CG12780
			CG12795
			CG12814
			CG12824
			CG12825
			CG12868
			CG12877
			CG12926
			CG12934
			CG12948,CG34409
			CG12963
			CG12974
			CG1299
			CG13001
			CG13012
			CG13025
			CG13026
			CG1304
			CG13049
			CG13063
			CG13067
			CG13077
			CG13078
			CG13091
			CG13102
			CG13113
			CG13114
			CG13124
			CG13142
			CG13159
			CG13177
			CG13185
			CG13215
			CG13252
			CG13255
			CG13280,Cas
			CG13284
			CG13297
			CG13309
			CG13315
			CG13321
			CG13323
			CG13324
			CG13325
			CG13360
			CG13366
			CG13373
			CG13384
			CG13397
			CG13422
			CG13428
			CG13482
			CG13488
			CG13492
			CG13506
			CG13510,CG13511,CG42565
			CG13531
			CG13565
			CG13599
			CG13606
			CG13607
			CG13618
			CG13624
			CG13625
			CG13631
			CG13641
			CG13650
			CG13658
			CG13659
			CG13704
			CG13707
			CG13728
			CG13739,CG13954
			CG13795
			CG13796
			CG13905
			CG13912
			CG13917
			CG13921
			CG13936
			CG13947
			CG1399
			CG13992
			CG14005
			CG14014
			CG14022
			CG14024
			CG14036
			CG14073
			CG14105
			CG14109
			CG14120
			CG14125
			CG14195
			CG14196
			CG14200,Pfrx
			CG14205
			CG14207
			CG14215
			CG14252
			CG14274
			CG14275
			CG14292
			CG14299
			CG14309,CG7675
			CG14322
			CG14400
			CG14401
			CG14408
			CG1441
			CG14411
			CG14438
			CG14439
			CG1444
			CG14440
			CG14441
			CG14442
			CG14446
			CG14464
			CG14478
			CG14495
			CG14516
			CG14535
			CG14562,CG7448
			CG14567
			CG14606
			CG1461
			CG14629
			CG14644
			CG14645
			CG14646
			CG14650
			CG14661
			CG1468
			CG14694
			CG14695
			CG14696
			CG14712
			CG14749
			CG14762
			CG14767
			CG14777,CG14778
			CG14803
			CG14812
			CG14814
			CG14820
			CG14823
			CG14830
			CG14834
			CG14915
			CG14931
			CG14949
			CG14965
			CG14967
			CG14968
			CG14984
			CG14997
			CG15022
			CG15043
			CG15044
			CG15065
			CG15067
			CG15068
			CG15096
			CG15098
			CG15099
			CG15100
			CG15107
			CG15117
			CG15126
			CG15152
			CG15155
			CG1516
			CG15160
			CG15201
			CG15203
			CG15254
			CG15255
			CG15279
			CG15293
			CG15312
			CG15345
			CG15347
			CG15356
			CG15394
			CG15406
			CG15412
			CG15422
			CG15423
			CG15435
			CG15436
			CG15439
			CG1544
			CG15506
			CG1552
			CG15523
			CG15530
			CG15531
			CG15533
			CG15543
			CG15546
			CG15556
			CG15611
			CG15617
			CG15618
			CG15629
			CG15661
			CG1572
			CG15739
			CG15740
			CG15744
			CG15767,CG42699
			CG15771
			CG1578
			CG15784
			CG15817
			CG15818
			CG1582
			CG15820
			CG15829
			CG15879
			CG15894
			CG1607
			CG1620
			CG1622
			CG1636
			CG1648
			CG1657
			CG16704
			CG16711
			CG16712
			CG16713,CG43165
			CG16727
			CG1673
			CG1674
			CG16742
			CG16743
			CG16749
			CG16756
			CG1677,CR44357
			CG16775
			CG16779
			CG1678
			CG16799
			CG16812
			CG16820
			CG16826
			CG16833
			CG16836
			CG16838
			CG16857
			CG16868
			CG16898
			CG16926
			CG1695
			CG16952
			CG16956
			CG16972
			CG16974
			CG16978
			CG1698
			CG16989
			CG17002
			CG17018
			CG1703
			CG17032
			CG17048,CR44206
			CG17075
			CG17078
			CG17107
			CG17108
			CG17124
			CG1718
			CG17186
			CG17190
			CG17192
			CG17224
			CG17233
			CG17239
			CG17244
			CG17278
			CG17323
			CG17360
			CG1737
			CG17377
			CG17494
			CG17508
			CG17544
			CG17549
			CG17560
			CG17562
			CG17571
			CG17574
			CG17597
			CG17612
			CG17633
			CG17646
			CG17672
			CG17681
			CG17715
			CG17739
			CG17777
			CG17778
			CG17829
			CG17834
			CG17839
			CG17855
			CG17928
			CG17999
			CG18004
			CG1806
			CG18067
			CG1809
			CG18095
			CG1812
			CG18135,CG3808
			CG1815
			CG18173
			CG18180
			CG18190
			CG18208
			CG18213
			CG18234
			CG18268,CG3014
			CG18278
			CG18304
			CG18324
			CG18327,CG8323
			CG18404
			CG18480
			CG18493
			CG18507
			CG18528
			CG18547
			CG18609
			CG18619
			CG18622
			CG18744
			CG18745
			CG18746
			CG18747
			CG18748
			CG18754,SPE
			CG18766
			CG18808,Dhc64C
			CG1882
			CG18869
			CG1889
			CG1909
			CG1942
			CG1970
			CG1983
			CG1998
			CG2016
			CG2022
			CG2025
			CG2065
			CG2070
			CG2076,Vago
			CG2129
			CG2135
			CG2137,Cyt-b5
			CG2145
			CG2182
			CG2186
			CG2187
			CG2202
			CG2225
			CG2233
			CG2247
			CG2254
			CG2258
			CG2278,slpr
			CG2321
			CG2469
			CG2519
			Cg25C
			CG2662
			CG2663
			CG2685
			CG2691
			CG2694
			CG2736
			CG2747
			CG2765
			CG2767
			CG2781
			CG2789
			CG2807
			CG2865
			CG2926
			CG2938
			CG2990
			CG30007
			CG30020
			CG30022,sprt
			CG30026
			CG30037,CG33145
			CG30046
			CG30056,fra
			CG30098
			CG30101
			CG30122
			CG30148
			CG30151
			CG30156,vimar
			CG30158
			CG30183
			CG30197
			CG30269,CG30273
			CG30272
			CG30278,Oatp58Da
			CG30289
			CG30344
			CG30345
			CG3036
			CG30377
			CG30389
			CG30413
			CG30421
			CG30424
			CG30427
			CG30440
			CG30467
			CG30486,antr
			CG3088
			CG3091
			CG3097
			CG31013
			CG31030
			CG31041
			CG31086,CG31323
			CG31087
			CG31102
			CG31104
			CG31108,CG31510
			CG31122
			CG31140
			CG31145
			CG31157
			CG31176
			CG31198
			CG31207
			CG31224
			CG31233
			CG31248
			CG31259
			CG31262
			CG31265,CG31269
			CG31272
			CG31288
			CG31300
			CG31313
			CG31324
			CG31326
			CG31342
			CG31343
			CG31365
			CG31368
			CG31407,Mical
			CG31414
			CG31427
			CG31431
			CG31445
			CG31457,hh
			CG31463
			CG31469
			CG31522
			CG31523
			CG3160
			CG31635
			CG31661
			CG31675,CG9338
			CG31676
			CG31678
			CG3168
			CG31681
			CG31688
			CG31697,CG33116
			CG31705
			CG31706
			CG31739
			CG31769
			CG31777
			CG31778
			CG31810
			CG31813
			CG31821
			CG31826,Ku80
			CG31869
			CG31886
			CG31897
			CG31928
			CG31997
			CG31998
			CG32023
			CG32024
			CG32032
			CG32066
			CG3209
			CG32091
			CG32113
			CG3214
			CG32196
			CG32198
			CG32202
			CG32206
			CG32221
			CG32280
			CG32284
			CG32295,Spn
			CG32350
			CG32365
			CG32368
			CG3238
			CG32407
			CG32425
			CG32452
			CG3246
			CG32479
			CG32483
			CG32485
			CG3253
			CG32549
			CG32557
			CG32625
			CG32633
			CG3264
			CG32645
			CG32667
			CG32676
			CG32687
			CG32695
			CG32750
			CG32751
			CG32758
			CG32767
			CG32772
			CG32809
			CG32833,CG32834
			CG3290
			CG3294
			CG32982
			CG33090
			CG33093
			CG33099
			CG33109
			CG33110
			CG33111,eIF4G2
			CG33120
			CG33123
			CG33144
			CG33172
			CG33217
			CG33258
			CG33275
			CG33298
			CG33301
			CG3332
			CG33337
			CG33346
			CG3344
			CG33468,CG33469
			CG33493,CG6463
			CG33494
			CG33509
			CG33510
			CG33511
			CG3356
			CG3368
			CG33695,cana
			CG3394
			CG3397
			CG33970
			CG3402
			CG34043
			CG34054
			CG34056,CG34057
			CG3408
			CG34113
			CG34114
			CG34120
			CG34126
			CG34133
			CG34136
			CG34148,CR45046,fit
			CG34166
			CG34172
			CG34176
			CG34198
			CG34203
			CG34211
			CG34212
			CG34215
			CG34216,tor
			CG34219,CG8248,Spt
			CG34227
			CG34232
			CG34234,fdl
			CG34236
			CG34253,CR32194,CR43253
			CG34256
			CG34279,CG34280,Sur-8
			CG34288
			CG34291
			CG3430
			CG34301
			CG34308,timeout
			CG34324
			CG34325
			CG34347
			CG34362
			CG34371
			CG34383
			CG34384
			CG34394
			CG34401
			CG34408
			CG34422
			CG34423,CG34424,CG9875
			CG34449
			CG34457
			CG3446
			CG3505
			CG3520
			CG3523
			CG3529
			CG3548
			CG3558
			CG3597
			CG3625
			CG3634
			CG3638
			CG3662
			CG3679,CR45485
			CG3680
			CG3690
			CG3699
			CG3726
			CG3731
			CG3744
			CG3764
			CG3815
			CG3819
			CG3823
			CG3829
			CG3835
			CG3841
			CG3847
			CG3868
			CG3902
			CG3906
			CG3907
			CG3921
			CG3961
			CG3964
			CG3987
			CG3999
			CG4000
			CG4009
			CG4019
			CG4020
			CG4036
			CG40485
			CG40486,CR45502
			CG4049
			CG4050
			CG4053
			CG4080
			CG4091
			CG4115,snmRNA:419
			CG4119
			CG4133
			CG4165
			CG4169
			CG42231,chif
			CG42232
			CG42238
			CG42240
			CG42249
			CG42255
			CG42260
			CG42261
			CG42265
			CG42271
			CG42319
			CG42327
			CG42335
			CG42340
			CG42364
			CG4238
			CG42388
			CG42389
			CG42397
			CG42450
			CG42494,Girdin
			CG4250
			CG42521
			CG42524
			CG42541
			CG42575
			CG42588
			CG42593
			CG42637,Gyc76C
			CG42656
			CG4266
			CG42668
			CG42671
			CG42672
			CG42674
			CG42684
			CG42697,GEFmeso
			CG42704
			CG42705
			CG42708
			CG42714
			CG42724
			CG42732
			CG42747
			CG42750
			CG42788
			CG42795
			CG42797
			CG42807,CG42808
			CG42813,CG42814
			CG4282
			CG42830,CadN2
			CG42855,Sik3
			CG4294
			CG4297
			CG4302
			CG43055
			CG4306
			CG43074
			CG43078
			CG43090
			CG43102
			CG43134
			CG43143
			CG43155
			CG43156
			CG43163
			CG43164
			CG43175
			CG43184
			CG43313
			CG43332,CG43333
			CG43342,CG43343
			CG43348
			CG43349
			CG4335
			CG43367
			CG43402
			CG43427
			CG43448
			CG4360
			CG4363
			CG43658
			CG43689
			CG43729
			CG43736
			CG43737
			CG43759
			CG4377
			CG43773,CG43774
			CG43777,tamo
			CG43783,orb2
			CG43867
			CG43901
			CG43921
			CG44006
			CG44013,CG44014
			CG4409
			CG44142
			CG4424
			CG44250,CG44251
			CG44261
			CG44385,Klp10A
			CG44437,sno
			CG4449
			CG4461
			CG4476
			CG44774
			CG44838
			CG4497
			CG45002
			CG45057
			CG45060,CG45061
			CG45076,CG45078,fau
			CG45080
			CG4511
			CG45186
			CG45263
			CG4554
			CG45544
			CG4557
			CG4570
			CG4577
			CG4586
			CG4592
			CG4607
			CG4612
			CG4623
			CG4666
			CG4670
			CG4702
			CG4716
			CG4729
			CG4734
			CG4751
			CG4768
			CG4769
			CG4781
			CG4797
			CG4858
			CG4880
			CG4911
			CG4935
			CG4949
			CG4962
			CG4996
			CG5001
			CG5002
			CG5004
			CG5004
			CG5009
			CG5010
			CG5011
			CG5023
			CG5026
			CG5059
			CG5080
			CG5087
			CG5096,gny
			CG5098
			CG5150
			CG5162
			CG5167
			CG5171
			CG5177
			CG5194
			CG5199
			CG5205
			CG5210
			CG5235
			CG5246
			CG5261
			CG5270
			CG5321
			CG5322
			CG5346
			CG5381
			CG5390
			CG5397
			CG5399
			CG5466
			CG5493
			CG5506
			CG5514
			CG5521
			CG5522
			CG5527
			CG5535
			CG5538,Desat1
			CG5550
			CG5577
			CG5590
			CG5597
			CG5604
			CG5626
			CG5646
			CG5674
			CG5687
			CG5694
			CG5697
			CG5703
			CG5707
			CG5724
			CG5726
			CG5728
			CG5746
			CG5758
			CG5767
			CG5770
			CG5776
			CG5778
			CG5787
			CG5789
			CG5807
			CG5819
			CG5823
			CG5844
			CG5849
			CG5853
			CG5867
			CG5877
			CG5886
			CG5895
			CG5909
			CG5913
			CG5916
			CG5921
			CG5937
			CG5945
			CG5953
			CG5955
			CG5958
			CG5966
			CG5973
			CG5999
			CG6012
			CG6020
			CG6040
			CG6048
			CG6051
			CG6066
			CG6067
			CG6074
			CG6115
			CG6125
			CG6142
			CG6175
			CG6188
			CG6225
			CG6227
			CG6230
			CG6231
			CG6259
			CG6272
			CG6295
			CG6325
			CG6347
			CG6357
			CG6385
			CG6403
			CG6409
			CG6420
			CG6422
			CG6425
			CG6426
			CG6454
			CG6479
			CG6484
			CG6495
			CG6498
			CG6503
			CG6509
			CG6511
			CG6568
			CG6574
			CG6602
			CG6656
			CG6660
			CG6664
			CG6686
			CG6695
			CG6701
			CG6734
			CG6745,CG6765
			CG6762
			CG6763,Cdc16
			CG6791
			CG6836
			CG6839
			CG6841
			CG6845
			CG6870
			CG6891
			CG6908
			CG6923
			CG6927
			CG6933
			CG6945,cp309
			CG6961
			CG6966
			CG6967
			CG6972
			CG7028
			CG7029,Usp12-46
			CG7065
			CG7110
			CG7139
			CG7149
			CG7154
			CG7156
			CG7158
			CG7182
			CG7185,CR45409
			CG7194
			CG7201
			CG7218
			CG7220
			CG7222
			CG7227
			CG7239
			CG7271
			CG7272
			CG7296
			CG7298
			CG7299
			CG7326
			CG7337
			CG7357
			CG7358
			CG7365
			CG7369
			CG7372
			CG7378
			CG7430
			CG7466
			CG7470
			CG7497
			CG7504
			CG7518
			CG7542
			CG7546
			CG7560
			CG7589
			CG7627
			CG7631
			CG7655
			CG7692
			CG7702
			CG7706
			CG7713
			CG7728
			CG7730
			CG7744
			CG7745
			CG7759
			CG7766
			CG7778
			CG7781
			CG7806
			CG7839
			CG7852
			CG7900
			CG7920
			CG7922
			CG7971
			CG7985
			CG7987
			CG8001
			CG8008
			CG8012
			CG8027
			CG8051,snmRNA:763
			CG8060
			CG8066
			CG8083
			CG8089
			CG8093
			CG8108
			CG8129
			CG8147
			CG8173
			CG8176,JHDM2
			CG8177
			CG8180
			CG8184
			CG8188
			CG8202
			CG8206
			CG8223,CR44228
			CG8243
			CG8273
			CG8290
			CG8301
			CG8303
			CG8306
			CG8312
			CG8317
			CG8319
			CG8334
			CG8353,CG8360
			CG8358
			CG8369
			CG8378
			CG8405
			CG8417
			CG8420
			CG8435
			CG8494,CG8503
			CG8516
			CG8520,CG8525
			CG8539
			CG8545
			CG8547
			CG8552
			CG8560
			CG8562
			CG8586
			CG8611
			CG8620
			CG8628
			CG8665
			CG8671
			CG8677,CR45713
			CG8679
			CG8712
			CG8735
			CG8736
			CG8738
			CG8745
			CG8768
			CG8771
			CG8773
			CG8774
			CG8785
			CG8833
			CG8834
			CG8837
			CG8839
			CG8841
			CG8858
			CG8861
			CG8878
			CG8888
			CG8892
			CG8907
			CG8924
			CG8925
			CG8944
			CG8949
			CG8950
			CG8952
			CG8963
			CG9004
			CG9005
			CG9034
			CG9062
			CG9065
			CG9086
			CG9090
			CG9095
			CG9098
			CG9135
			CG9140
			CG9172
			CG9184,CR45166
			CG9203
			CG9246
			CG9259
			CG9279
			CG9286
			CG9312
			CG9323
			CG9328
			CG9331
			CG9336
			CG9350
			CG9360
			CG9372
			CG9380
			CG9394
			CG9411
			CG9413
			CG9416
			CG9425
			CG9426
			CG9436
			CG9444
			CG9447,Spn42Da
			CG9451
			CG9452
			CG9458
			CG9463
			CG9465
			CG9466
			CG9468
			CG9498
			CG9505
			CG9527
			CG9555
			CG9568
			CG9572
			CG9593,nsl1
			CG9609
			CG9616
			CG9626
			CG9631
			CG9636
			CG9641
			CG9646
			CG9649
			CG9673
			CG9674
			CG9689
			CG9691
			CG9692
			CG9702
			CG9705
			CG9715
			CG9717
			CG9727
			CG9743
			CG9747
			CG9759
			CG9776
			CG9795
			CG9812
			CG9813
			CG9825
			CG9836
			CG9902
			CG9914
			CG9915
			CG9925
			CG9926
			CG9928
			CG9932
			CG9934
			CG9940
			CG9941
			CG9990
			CG9993
			Cha,VAChT
			chas
			chb
			Chd1
			Chd3
			Chd64
			CheB38c
			CheB42c,mim
			cher
			CHES-1-like
			chinmo
			CHKov1
			CHKov2
			chm
			Chmp1
			chn
			Chrac-14
			chrb
			Cht3
			Cht4
			Cht5
			Cht8
			Cht9
			ci
			cic
			cid
			cindr
			Cirl
			ck
			Cka
			ckd
			Cks30A
			Claspin
			ClC-a
			ClC-c
			Clect27
			cln3
			Clp
			clu
			cmet
			Cnb
			cnc
			Cngl
			cnk
			cnn
			cno
			Cnot4
			CoIV
			comm2
			Cont
			conu
			CoRest
			corto
			cos
			CoVIII
			Cp15
			Cp190
			cpo
			Cpr100A
			Cpr30B
			Cpr47Ee
			Cpr49Ab
			Cpr49Ae
			Cpr51A
			Cpr62Bb
			Cpr65Ea
			Cpr65Eb
			Cpr66D
			Cpr67B
			Cpr72Ec
			Cpsf160
			CR18228,CR18228-RB,CR18228-RC
			CR18854,CR18854-RB,CR18854-RC
			CR31781
			CR33963,Tis11
			CR42791
			CR42868
			CR43250
			CR43264
			CR43314
			CR43334
			CR43432
			CR43459
			CR43611
			CR43651
			CR43857
			CR43888
			CR43958,Thd1
			CR43963,Smr
			CR44092,mask
			CR44138
			CR44241,Trpm
			CR44392,tweek
			CR44404
			CR44620
			CR44832
			CR44957,mei-9
			CR44999,dm
			CR45033,Hph
			CR45040,Kaz-m1
			CR45054
			CR45102
			CR45168,sti
			CR45204,Imp
			CR45291
			CR45433
			CR45517
			CR45612
			CR45631
			CR45736
			CR45756,Ilp8
			Crag
			crb
			CREG
			crm
			CRMP
			crol
			crp
			Crtc,snmRNA:641
			Csas
			Csk
			Csp
			csul
			csw
			ct
			cta
			CtBP
			CTCF
			Ctf4
			CtsB1
			cu
			Cubn
			Cul1
			Cul5
			cutlet
			cv-2
			cv-c
			cyc
			CycA
			CycB
			CycB3
			CycD
			CycE
			CycT
			CycY
			CYLD
			Cyp12a4
			Cyp12a5
			Cyp12c1
			Cyp12e1
			Cyp18a1
			Cyp28a5
			Cyp28d1
			Cyp305a1
			Cyp309a1,Cyp309a2
			Cyp4ad1
			Cyp4d21
			Cyp4d8
			Cyp4e2
			Cyp4e3
			Cyp4g15
			Cyp4p1
			Cyp6a13
			Cyp6a14
			Cyp6a17
			Cyp6a18
			Cyp6a19
			Cyp6a2
			Cyp6a20
			Cyp6a21
			Cyp6a23
			Cyp6a8
			Cyp6d2
			Cyp6d4
			Cyp6g1
			Cyp6v1
			Cyp9b1
			Cyp9b2
			Cyp9c1
			Cyp9f2
			Cyp9h1
			cype
			Cys
			Cyt-b5-r
			D12
			D19A
			d4
			da
			DAAM
			Dab
			dah
			dalao
			Damm
			dap
			Dap160
			daw
			Dbi
			dbo
			dco
			Dcp2
			Dcr-1
			Dd
			Ddc
			Deaf1
			decay
			Dek
			deltaTry
			Det
			Df31
			Dg
			dgo
			dgt3
			dgt6
			Dh44
			Dhc36C
			Dhc93AB
			dhd
			dia
			Dic1
			didum
			dikar
			Dip-C
			DIP2
			Dip3
			disco
			disco-r
			disp
			Dl
			dlg1
			Dlic
			DLP
			dlp
			dmGlut
			dmpd
			DNA-ligI
			DnaJ-1
			DNApol-alpha180
			DNApol-alpha73
			DNApol-delta
			DNApol-epsilon
			DNApol-eta
			DNaseII
			dnc
			dnk
			dock
			dom,snmRNA:184,snoRNA:Me28S-G2596
			dome
			Dop1R1
			Dop2R
			DOR
			dos
			dp
			Dp1
			dpa
			dpr19
			Dpt
			DptB
			Drak
			Drat
			drd
			dre4
			Dref
			Drep-1
			Drep-2
			Drip
			drm
			Dro
			drosha
			Drs
			Drsl3
			Drsl4
			Drsl5
			Dscam1
			Dscam2
			Dscam4
			dsd
			dsh
			Dtg
			DUBAI
			Duox
			dup
			dwg
			dx
			Dys,snoRNA:Me18S-A1374
			dysc
			E(bx)
			E(Pc)
			E(spl)m7-HLH
			E(spl)mbeta-HLH
			E(var)3-9
			e(y)3
			E23
			E2f
			Eaf
			eag
			ear
			east
			eater
			ebd1
			ebi
			ebo
			eco
			EcR
			ect
			Ect3
			Ect4
			ed
			Edc3
			edl
			Ef1alpha100E
			Efa6
			egg
			egh
			egl
			Egm
			egr
			eIF4G
			eIF5B
			Eip63E
			Eip71CD
			Eip74EF
			Eip75B
			Eip93F
			Ela
			Elba2
[truncated: 1,410 more rows]

## Sheet: virgin_NEW
gene_id	sample_1	sample_2	status	value_1	value_2	log2_fold_change	test_stat	p_value	q_value	significant	tracking_id	gene_short_name
XLOC_000061	ND	D	OK	70.1045	28.8076	-1.28305	-5.70369	5e-05	0.0132705	yes	XLOC_000061	Lsp1beta
XLOC_000095	ND	D	OK	10.3191	5.42967	-0.926375	-2.54709	5e-05	0.0132705	yes	XLOC_000095	CG31926
XLOC_000330	ND	D	OK	33.689	3.58312	-3.23299	-6.00474	5e-05	0.0132705	yes	XLOC_000330	TotM
XLOC_000460	ND	D	OK	2.10948	0.785283	-1.4256	-2.63344	5e-05	0.0132705	yes	XLOC_000460	Cyp4d21
XLOC_000698	ND	D	OK	0.340861	1.04282	1.61323	2.5253	5e-05	0.0132705	yes	XLOC_000698	CG17097
XLOC_000896	ND	D	OK	11.6951	22.0505	0.914903	3.56508	5e-05	0.0132705	yes	XLOC_000896	Cyp28a5
XLOC_001026	ND	D	OK	22.7765	31.3662	0.461662	2.07638	0.00015	0.0316867	yes	XLOC_001026	Ugt36Bc
XLOC_001145	ND	D	OK	35.6238	20.8248	-0.774539	-3.15769	5e-05	0.0132705	yes	XLOC_001145	CG13084
XLOC_001146	ND	D	OK	69.3267	45.3881	-0.611097	-2.58097	5e-05	0.0132705	yes	XLOC_001146	CG13083
XLOC_002895	ND	D	OK	0.50147	7.56108	3.91436	3.82123	0.00015	0.0316867	yes	XLOC_002895	PGRP-SC1a
XLOC_002896	ND	D	OK	2.47188	15.035	2.60464	4.66774	5e-05	0.0132705	yes	XLOC_002896	PGRP-SC1b
XLOC_003294	ND	D	OK	9.85821	21.7323	1.14045	5.08193	5e-05	0.0132705	yes	XLOC_003294	Mdr50
XLOC_003350	ND	D	OK	25.6171	45.9143	0.841835	3.85188	5e-05	0.0132705	yes	XLOC_003350	Cyp6a23
XLOC_003595	ND	D	OK	13.4891	20.2929	0.589178	2.43079	5e-05	0.0132705	yes	XLOC_003595	CG10910
XLOC_003624	ND	D	OK	341.501	188.45	-0.857709	-3.36636	5e-05	0.0132705	yes	XLOC_003624	IM1
XLOC_003629	ND	D	OK	636.612	395.195	-0.687851	-2.29797	0.0001	0.023525	yes	XLOC_003629	CG15065
XLOC_004252	ND	D	OK	39.5958	69.1738	0.804878	3.72024	5e-05	0.0132705	yes	XLOC_004252	Cyp9b2
XLOC_004368	ND	D	OK	6.42141	10.9368	0.768224	2.53048	5e-05	0.0132705	yes	XLOC_004368	Cyp6a14
XLOC_004810	ND	D	OK	17.4435	27.5773	0.660787	2.71157	5e-05	0.0132705	yes	XLOC_004810	Cyp6a21
XLOC_004811	ND	D	OK	33.9808	49.4755	0.541993	2.50751	0.0001	0.023525	yes	XLOC_004811	Cyp6a8
XLOC_005042	ND	D	OK	33.3329	12.9023	-1.36932	-3.29537	5e-05	0.0132705	yes	XLOC_005042	IM23
XLOC_005355	ND	D	OK	1.31006	7.29389	2.47705	5.153	5e-05	0.0132705	yes	XLOC_005355	pirk
XLOC_005399	ND	D	OK	1.72494	5.67808	1.71885	4.19506	5e-05	0.0132705	yes	XLOC_005399	CG3264
XLOC_005581	ND	D	OK	0.910188	2.81499	1.62889	3.26917	5e-05	0.0132705	yes	XLOC_005581	CG4563
XLOC_005640	ND	D	OK	2.18287	4.9466	1.18021	2.38933	0.0001	0.023525	yes	XLOC_005640	Peb
XLOC_005882	ND	D	OK	0	1.65407	Inf	NA	5e-05	0.0132705	yes	XLOC_005882	dro3
XLOC_006078	ND	D	OK	1.75358	8.7584	2.32036	2.85642	0.0002	0.0390604	yes	XLOC_006078	CG15829
XLOC_006157	ND	D	OK	2.95647	7.61563	1.36509	2.82023	5e-05	0.0132705	yes	XLOC_006157	Jon66Ci
XLOC_006177	ND	D	OK	0.796798	1.88081	1.23907	2.26568	0.00015	0.0316867	yes	XLOC_006177	CG6372
XLOC_006184	ND	D	OK	1069.85	713.018	-0.585392	-2.27213	0.0002	0.0390604	yes	XLOC_006184	Cp18
XLOC_006398	ND	D	OK	8.43201	4.99762	-0.754634	-2.62008	5e-05	0.0132705	yes	XLOC_006398	Lsp2
XLOC_007245	ND	D	OK	1689.96	66860.8	5.3061	28.4126	5e-05	0.0132705	yes	XLOC_007245	RpL28,snoRNA:Or-CD11a,snoRNA:Or-CD11b,snoRNA:Or-CD12
XLOC_008124	ND	D	OK	19.8907	31.9927	0.68565	2.20827	5e-05	0.0132705	yes	XLOC_008124	CG16775
XLOC_008259	ND	D	OK	3.84164	7.12101	0.890359	2.16718	0.0002	0.0390604	yes	XLOC_008259	CG7298
XLOC_008763	ND	D	OK	63.8442	131.242	1.0396	4.42064	5e-05	0.0132705	yes	XLOC_008763	CG8147
XLOC_008866	ND	D	OK	17.4662	10.152	-0.782798	-2.76811	5e-05	0.0132705	yes	XLOC_008866	CG4757
XLOC_008984	ND	D	OK	16.2543	43.659	1.42546	6.01107	5e-05	0.0132705	yes	XLOC_008984	CG5724
XLOC_009353	ND	D	OK	11.2318	17.7355	0.659046	2.62061	5e-05	0.0132705	yes	XLOC_009353	Cyp12a5
XLOC_009384	ND	D	OK	20.9891	14.5887	-0.524787	-2.19249	0.0001	0.023525	yes	XLOC_009384	CG11407
XLOC_009444	ND	D	OK	448.124	187.222	-1.25915	-5.21287	5e-05	0.0132705	yes	XLOC_009444	TotA
XLOC_009445	ND	D	OK	252.911	106.733	-1.24463	-5.02084	5e-05	0.0132705	yes	XLOC_009445	TotC
XLOC_009541	ND	D	OK	167.299	235.032	0.490427	2.19609	5e-05	0.0132705	yes	XLOC_009541	CG18594
XLOC_009763	ND	D	OK	16.9039	32.2424	0.931607	3.82092	5e-05	0.0132705	yes	XLOC_009763	CG11893
XLOC_010060	ND	D	OK	3.41566	6.15237	0.84898	2.61366	5e-05	0.0132705	yes	XLOC_010060	CG15533
XLOC_010627	ND	D	OK	13.0859	22.9307	0.809268	2.4601	5e-05	0.0132705	yes	XLOC_010627	CG6830
XLOC_011488	ND	D	OK	106.324	77.1186	-0.463316	-2.09696	0.00015	0.0316867	yes	XLOC_011488	tobi
XLOC_012304	ND	D	OK	34.313	20.6934	-0.729584	-3.14595	5e-05	0.0132705	yes	XLOC_012304	CG15570
XLOC_012729	ND	D	OK	32.0782	20.0347	-0.679092	-2.61723	5e-05	0.0132705	yes	XLOC_012729	CG32642
XLOC_013027	ND	D	OK	356.356	250.7	-0.507356	-2.06485	0.00025	0.0479213	yes	XLOC_013027	Tsf1
XLOC_013058	ND	D	OK	485.088	336.42	-0.527981	-2.43394	5e-05	0.0132705	yes	XLOC_013058	CG34329
XLOC_013379	ND	D	OK	21.2456	10.8695	-0.966872	-2.1841	0.00015	0.0316867	yes	XLOC_013379	CG15571
XLOC_013380	ND	D	OK	62.0609	39.818	-0.640263	-2.5945	5e-05	0.0132705	yes	XLOC_013380	Femcoat
XLOC_013652	ND	D	OK	10.401	14.967	0.52506	2.11498	0.0002	0.0390604	yes	XLOC_013652	CG3106
XLOC_014137	ND	D	OK	60.6176	88.5136	0.546163	2.20053	0.0001	0.023525	yes	XLOC_014137	CG15043

## Sheet: mated_NEW
gene_id	sample_1	sample_2	status	value_1	value_2	log2_fold_change	test_stat	p_value	q_value	significant	tracking_id	gene_short_name
XLOC_000047	ND	D	OK	64.345	157.566	1.29205	4.27258	5e-05	0.00613841	yes	XLOC_000047	CG13947
XLOC_000061	ND	D	OK	227.935	67.819	-1.74886	-6.85015	5e-05	0.00613841	yes	XLOC_000061	Lsp1beta
XLOC_000093	ND	D	OK	26.7314	14.1672	-0.915975	-3.02057	5e-05	0.00613841	yes	XLOC_000093	CG31928
XLOC_000095	ND	D	OK	12.5513	5.157	-1.28324	-2.95294	5e-05	0.00613841	yes	XLOC_000095	CG31926
XLOC_000596	ND	D	OK	33.6673	17.3802	-0.953903	-2.53865	5e-05	0.00613841	yes	XLOC_000596	CG13113
XLOC_000776	ND	D	OK	21.0643	13.2984	-0.663547	-2.16059	0.0004	0.0369431	yes	XLOC_000776	Rh5
XLOC_000872	ND	D	OK	18.9364	31.5892	0.738268	2.09388	0.00035	0.0332401	yes	XLOC_000872	CG31813
XLOC_000896	ND	D	OK	23.4502	53.3351	1.18549	4.80574	5e-05	0.00613841	yes	XLOC_000896	Cyp28a5
XLOC_000958	ND	D	OK	23.9892	13.0222	-0.881414	-2.34182	0.0002	0.0209729	yes	XLOC_000958	CG7631
XLOC_001026	ND	D	OK	38.056	59.4921	0.644575	2.78112	5e-05	0.00613841	yes	XLOC_001026	Ugt36Bc
XLOC_001033	ND	D	OK	18.1149	25.4557	0.490812	2.00421	0.00035	0.0332401	yes	XLOC_001033	CG42555
XLOC_001068	ND	D	OK	11.7458	20.7905	0.82378	2.7374	5e-05	0.00613841	yes	XLOC_001068	ninaD
XLOC_001074	ND	D	OK	167.598	119.584	-0.486985	-2.08196	0.0003	0.029902	yes	XLOC_001074	CG15155
XLOC_001145	ND	D	OK	49.1952	22.661	-1.11831	-4.30455	5e-05	0.00613841	yes	XLOC_001145	CG13084
XLOC_001146	ND	D	OK	97.2978	43.4434	-1.16327	-4.60234	5e-05	0.00613841	yes	XLOC_001146	CG13083
XLOC_001672	ND	D	OK	178.918	125.215	-0.514891	-2.15758	0.00035	0.0332401	yes	XLOC_001672	Jon25Bii
XLOC_001877	ND	D	OK	8.34255	4.99735	-0.739325	-2.17927	0.0004	0.0369431	yes	XLOC_001877	CG7227
XLOC_001941	ND	D	OK	6.90367	17.9382	1.3776	4.95373	5e-05	0.00613841	yes	XLOC_001941	CG9463
XLOC_001942	ND	D	OK	0.931706	2.86273	1.61945	2.82749	5e-05	0.00613841	yes	XLOC_001942	CG9465
XLOC_001943	ND	D	OK	39.1297	66.0696	0.75572	3.13354	5e-05	0.00613841	yes	XLOC_001943	CG9466
XLOC_001944	ND	D	OK	46.9953	78.7373	0.744532	3.06454	5e-05	0.00613841	yes	XLOC_001944	CG9468
XLOC_001975	ND	D	OK	89.4444	29.8141	-1.585	-6.47229	5e-05	0.00613841	yes	XLOC_001975	Cyp4e3
XLOC_002072	ND	D	OK	469.145	740.229	0.657937	2.56438	5e-05	0.00613841	yes	XLOC_002072	CG17108
XLOC_002206	ND	D	OK	0	1.54949	Inf	NA	5e-05	0.00613841	yes	XLOC_002206	CG31730
XLOC_002539	ND	D	OK	230.103	148.267	-0.634079	-2.70981	5e-05	0.00613841	yes	XLOC_002539	CG17571
XLOC_002877	ND	D	OK	22.5449	35.1457	0.640545	2.60574	5e-05	0.00613841	yes	XLOC_002877	CG8693
XLOC_002977	ND	D	OK	8.4873	4.77828	-0.828814	-2.67486	5e-05	0.00613841	yes	XLOC_002977	CG1698
XLOC_003238	ND	D	OK	83.7109	41.2002	-1.02277	-4.0372	5e-05	0.00613841	yes	XLOC_003238	AttC
XLOC_003294	ND	D	OK	9.8163	23.1311	1.23658	5.10114	5e-05	0.00613841	yes	XLOC_003294	Mdr50
XLOC_003338	ND	D	OK	59.4545	21.1078	-1.49401	-2.86425	5e-05	0.00613841	yes	XLOC_003338	Dro
XLOC_003350	ND	D	OK	54.0754	110.733	1.03405	4.42287	5e-05	0.00613841	yes	XLOC_003350	Cyp6a23
XLOC_003478	ND	D	OK	41.0567	15.9337	-1.36554	-4.31636	5e-05	0.00613841	yes	XLOC_003478	CG5550
XLOC_003595	ND	D	OK	48.805	35.1465	-0.473648	-1.96389	0.0005	0.0441535	yes	XLOC_003595	CG10910
XLOC_003673	ND	D	OK	34.0258	5.17714	-2.7164	-4.2296	5e-05	0.00613841	yes	XLOC_003673	Dpt
XLOC_003674	ND	D	OK	70.2968	22.9823	-1.61293	-3.61331	5e-05	0.00613841	yes	XLOC_003674	DptB
XLOC_004199	ND	D	OK	1.09837	2.26526	1.04431	2.24793	0.0002	0.0209729	yes	XLOC_004199	Ptr
XLOC_004252	ND	D	OK	84.3866	146.856	0.799313	3.37593	5e-05	0.00613841	yes	XLOC_004252	Cyp9b2
XLOC_004343	ND	D	OK	2.71394	7.33861	1.43512	2.41866	0.00015	0.0162371	yes	XLOC_004343	CG14756
XLOC_004364	ND	D	OK	26.078	43.5947	0.74132	3.11108	5e-05	0.00613841	yes	XLOC_004364	LvpL
XLOC_004368	ND	D	OK	13.2693	27.7199	1.06283	3.86133	5e-05	0.00613841	yes	XLOC_004368	Cyp6a14
XLOC_004655	ND	D	OK	19.1092	9.06787	-1.07543	-3.48846	5e-05	0.00613841	yes	XLOC_004655	CG8785
XLOC_004677	ND	D	OK	15.6139	23.8884	0.613481	2.54839	5e-05	0.00613841	yes	XLOC_004677	Mdr49
XLOC_004810	ND	D	OK	40.4253	62.9089	0.638007	2.72065	5e-05	0.00613841	yes	XLOC_004810	Cyp6a21
XLOC_004826	ND	D	OK	24.2746	51.3349	1.08049	4.02981	5e-05	0.00613841	yes	XLOC_004826	CG8093
XLOC_005042	ND	D	OK	95.831	54.1775	-0.822799	-2.48882	5e-05	0.00613841	yes	XLOC_005042	IM23
XLOC_005111	ND	D	OK	1838.46	1130.11	-0.702044	-2.44427	0.00015	0.0162371	yes	XLOC_005111	CG16926
XLOC_005305	ND	D	OK	8.95046	15.9172	0.83055	2.42026	0.0001	0.0115713	yes	XLOC_005305	Cht4
XLOC_005306	ND	D	OK	41.1869	27.6912	-0.572756	-2.15648	0.0003	0.029902	yes	XLOC_005306	Cht9
XLOC_005368	ND	D	OK	9.06848	19.7068	1.11976	3.00865	5e-05	0.00613841	yes	XLOC_005368	CG34040
XLOC_005399	ND	D	OK	14.7972	8.99455	-0.718202	-2.40744	5e-05	0.00613841	yes	XLOC_005399	CG3264
XLOC_005799	ND	D	OK	5.64805	10.9344	0.953056	2.35015	0.0002	0.0209729	yes	XLOC_005799	CG1139
XLOC_005813	ND	D	OK	98.6119	69.3675	-0.507502	-2.07828	0.0001	0.0115713	yes	XLOC_005813	yellow-g2
XLOC_005957	ND	D	OK	17.7828	29.6474	0.737421	2.34498	0.0001	0.0115713	yes	XLOC_005957	CG33514
XLOC_006027	ND	D	OK	204.59	134.46	-0.605558	-2.58499	5e-05	0.00613841	yes	XLOC_006027	Jon65Aii
XLOC_006157	ND	D	OK	18.4563	10.3028	-0.841073	-2.11966	0.0005	0.0441535	yes	XLOC_006157	Jon66Ci
XLOC_006184	ND	D	OK	1311.1	644.905	-1.02361	-3.7547	5e-05	0.00613841	yes	XLOC_006184	Cp18
XLOC_006185	ND	D	OK	4755.65	2402.49	-0.98511	-3.35384	5e-05	0.00613841	yes	XLOC_006185	Cp15
XLOC_006186	ND	D	OK	932.668	472.12	-0.982209	-3.67792	5e-05	0.00613841	yes	XLOC_006186	Cp19
XLOC_006187	ND	D	OK	559.568	270.236	-1.0501	-3.96022	5e-05	0.00613841	yes	XLOC_006187	Cp16
XLOC_006405	ND	D	OK	122.71	175.563	0.516734	2.17023	0.00035	0.0332401	yes	XLOC_006405	CG6910
XLOC_006478	ND	D	OK	1.05833	4.02131	1.92587	2.60207	0.0001	0.0115713	yes	XLOC_006478	CG14110
XLOC_007152	ND	D	OK	11.0898	17.0184	0.617862	2.04536	0.00035	0.0332401	yes	XLOC_007152	CG18173
XLOC_007162	ND	D	OK	17.4244	6.87663	-1.34134	-3.5951	5e-05	0.00613841	yes	XLOC_007162	CG13936
XLOC_007191	ND	D	OK	76.2597	53.093	-0.522399	-2.08952	5e-05	0.00613841	yes	XLOC_007191	yellow-g
XLOC_007261	ND	D	OK	1.71808	6.27865	1.86966	3.44176	5e-05	0.00613841	yes	XLOC_007261	ImpE2
XLOC_007276	ND	D	OK	5.17599	10.1533	0.972044	2.14665	0.00055	0.0469225	yes	XLOC_007276	CG12766
XLOC_007374	ND	D	OK	2.49886	10.777	2.10862	3.62496	5e-05	0.00613841	yes	XLOC_007374	CG10591
XLOC_007404	ND	D	OK	118.954	63.2892	-0.910378	-3.7377	5e-05	0.00613841	yes	XLOC_007404	Jon65Ai
XLOC_007430	ND	D	OK	8.0996	11.4613	0.500844	1.97665	0.00045	0.0408122	yes	XLOC_007430	CG10226
XLOC_007566	ND	D	OK	36.4628	56.4663	0.630968	2.61045	5e-05	0.00613841	yes	XLOC_007566	CR32028
XLOC_008020	ND	D	OK	12.638	20.3912	0.690177	2.59063	5e-05	0.00613841	yes	XLOC_008020	Cpr72Ec
XLOC_008259	ND	D	OK	43.1502	21.7029	-0.991479	-3.67491	5e-05	0.00613841	yes	XLOC_008259	CG7298
XLOC_008538	ND	D	OK	18.0928	26.2609	0.537499	2.08985	0.0003	0.029902	yes	XLOC_008538	CG1208,glob3
XLOC_008547	ND	D	OK	13.6868	8.53581	-0.68118	-2.28637	5e-05	0.00613841	yes	XLOC_008547	CG1077
XLOC_008606	ND	D	OK	23.9762	37.1145	0.630378	2.35455	5e-05	0.00613841	yes	XLOC_008606	CG1979,Sodh-1
XLOC_008808	ND	D	OK	39.8761	18.6433	-1.09687	-2.63814	5e-05	0.00613841	yes	XLOC_008808	Npc2e
XLOC_008984	ND	D	OK	30.5651	114.493	1.9053	7.96117	5e-05	0.00613841	yes	XLOC_008984	CG5724
XLOC_009237	ND	D	OK	36.598	22.2106	-0.720514	-2.57493	5e-05	0.00613841	yes	XLOC_009237	CG5246
XLOC_009287	ND	D	OK	1.67284	2.80258	0.744454	2.00913	0.0005	0.0441535	yes	XLOC_009287	tinc
XLOC_009353	ND	D	OK	20.6737	43.5181	1.07382	4.43728	5e-05	0.00613841	yes	XLOC_009353	Cyp12a5
XLOC_009444	ND	D	OK	566.659	918.32	0.696516	2.73066	5e-05	0.00613841	yes	XLOC_009444	TotA
XLOC_009445	ND	D	OK	216.83	533.394	1.29864	5.48853	5e-05	0.00613841	yes	XLOC_009445	TotC
XLOC_009760	ND	D	OK	40.7771	59.2739	0.539639	2.30619	0.00015	0.0162371	yes	XLOC_009760	CG31300
XLOC_009761	ND	D	OK	35.6706	58.992	0.725782	3.07083	5e-05	0.00613841	yes	XLOC_009761	CG31104
XLOC_009763	ND	D	OK	45.6239	98.7832	1.11448	4.62867	5e-05	0.00613841	yes	XLOC_009763	CG11893
XLOC_009819	ND	D	OK	9.8053	5.7837	-0.761567	-2.17951	0.00025	0.0256811	yes	XLOC_009819	CG31324
XLOC_010060	ND	D	OK	7.51757	12.0791	0.68417	2.34279	5e-05	0.00613841	yes	XLOC_010060	CG15533
XLOC_010065	ND	D	OK	139.009	93.9841	-0.564687	-2.44799	5e-05	0.00613841	yes	XLOC_010065	Jon99Fi
XLOC_010481	ND	D	OK	18.2646	28.5149	0.642667	2.19038	0.00025	0.0256811	yes	XLOC_010481	CG9363
XLOC_010591	ND	D	OK	16.8282	29.4725	0.808491	3.04219	5e-05	0.00613841	yes	XLOC_010591	Ugt86Dd
XLOC_010627	ND	D	OK	17.1707	41.0445	1.25724	4.12517	5e-05	0.00613841	yes	XLOC_010627	CG6830
XLOC_010628	ND	D	OK	7.55154	11.5833	0.617199	2.26448	5e-05	0.00613841	yes	XLOC_010628	CG6834
XLOC_010629	ND	D	OK	49.3507	72.2838	0.5506	2.35714	0.00015	0.0162371	yes	XLOC_010629	CG6908
XLOC_010662	ND	D	OK	0.842392	4.03503	2.26002	2.86552	5e-05	0.00613841	yes	XLOC_010662	CG4702
XLOC_010942	ND	D	OK	13.803	9.15648	-0.592117	-2.06822	0.00015	0.0162371	yes	XLOC_010942	CG10345
XLOC_010962	ND	D	OK	49.983	33.2298	-0.588958	-2.37852	5e-05	0.00613841	yes	XLOC_010962	CG4009
XLOC_011232	ND	D	OK	503.01	349.03	-0.527237	-2.24919	0.0001	0.0115713	yes	XLOC_011232	fit
XLOC_011484	ND	D	OK	21.4627	36.3416	0.759795	2.95584	5e-05	0.00613841	yes	XLOC_011484	CG10562
XLOC_011566	ND	D	OK	104.418	57.6372	-0.857303	-3.60161	5e-05	0.00613841	yes	XLOC_011566	CG17192
XLOC_011569	ND	D	OK	13.6692	29.0877	1.08948	3.56326	5e-05	0.00613841	yes	XLOC_011569	CG6277
XLOC_011686	ND	D	OK	41.7384	20.1432	-1.05108	-3.11915	5e-05	0.00613841	yes	XLOC_011686	CG31041
XLOC_011694	ND	D	OK	125.876	69.6169	-0.854498	-3.25422	5e-05	0.00613841	yes	XLOC_011694	Obp99b
XLOC_011783	ND	D	OK	11.2897	6.5925	-0.776116	-2.36368	5e-05	0.00613841	yes	XLOC_011783	PH4alphaPV
XLOC_012161	ND	D	OK	37.0996	24.7689	-0.582874	-2.30328	5e-05	0.00613841	yes	XLOC_012161	CG11381
XLOC_012304	ND	D	OK	41.258	25.6466	-0.685905	-2.8704	5e-05	0.00613841	yes	XLOC_012304	CG15570
XLOC_012729	ND	D	OK	42.178	17.4837	-1.27048	-4.33467	5e-05	0.00613841	yes	XLOC_012729	CG32642
XLOC_012731	ND	D	OK	18.6391	11.8869	-0.648953	-2.57565	5e-05	0.00613841	yes	XLOC_012731	CG15721
XLOC_013081	ND	D	OK	20.5847	11.8754	-0.793593	-2.92217	5e-05	0.00613841	yes	XLOC_013081	CG14205
XLOC_013089	ND	D	OK	15.3605	21.4174	0.479553	1.99051	0.00045	0.0408122	yes	XLOC_013089	CG14215
XLOC_013379	ND	D	OK	30.1904	12.5198	-1.26988	-2.40494	0.0004	0.0369431	yes	XLOC_013379	CG15571
XLOC_013380	ND	D	OK	94.3093	39.9081	-1.24072	-4.69425	5e-05	0.00613841	yes	XLOC_013380	Femcoat
XLOC_013466	ND	D	OK	24.5669	13.1074	-0.906333	-3.36223	5e-05	0.00613841	yes	XLOC_013466	vanin-like
XLOC_013634	ND	D	OK	18.2274	25.7687	0.499506	2.04283	0.00055	0.0469225	yes	XLOC_013634	mxc
XLOC_013818	ND	D	OK	12.3313	3.66872	-1.74897	-4.00114	5e-05	0.00613841	yes	XLOC_013818	CG12716
XLOC_013900	ND	D	OK	142.704	86.7123	-0.718721	-3.02158	5e-05	0.00613841	yes	XLOC_013900	Ag5r2
XLOC_014082	ND	D	OK	98.2303	70.1345	-0.486044	-1.94392	0.00055	0.0469225	yes	XLOC_014082	CG8661
XLOC_014137	ND	D	OK	212.714	153.418	-0.471446	-1.97846	0.00055	0.0469225	yes	XLOC_014137	CG15043
XLOC_014225	ND	D	OK	0.829126	1.87241	1.17523	2.03352	0.00015	0.0162371	yes	XLOC_014225	D2R

## Sheet: males_NEW
gene_id	sample_1	sample_2	status	value_1	value_2	log2_fold_change	test_stat	p_value	q_value	significant	tracking_id	gene_short_name
XLOC_000047	ND	D	OK	44.4026	85.938	0.952651	3.92814	5e-05	0.00542909	yes	XLOC_000047	CG13947
XLOC_000061	ND	D	OK	62.355	34.3322	-0.860942	-5.21644	5e-05	0.00542909	yes	XLOC_000061	Lsp1beta
XLOC_000083	ND	D	OK	115.971	151.871	0.389091	2.34845	5e-05	0.00542909	yes	XLOC_000083	CG5011
XLOC_000085	ND	D	OK	12.8354	18.6346	0.53786	2.67971	5e-05	0.00542909	yes	XLOC_000085	CG42329
XLOC_000251	ND	D	OK	63.3449	85.039	0.424896	2.16769	0.00025	0.0224511	yes	XLOC_000251	CG15423
XLOC_000328	ND	D	OK	52.3097	34.4537	-0.602417	-3.64789	5e-05	0.00542909	yes	XLOC_000328	vri
XLOC_000389	ND	D	OK	15.4172	20.0535	0.379314	1.97433	0.00065	0.0494497	yes	XLOC_000389	Ugt37b1
XLOC_000460	ND	D	OK	122.481	90.2267	-0.440927	-2.6756	5e-05	0.00542909	yes	XLOC_000460	Cyp4d21
XLOC_000477	ND	D	OK	175.275	231.855	0.403602	2.4521	5e-05	0.00542909	yes	XLOC_000477	lectin-28C
XLOC_000502	ND	D	OK	15.3437	22.8488	0.574465	2.30118	5e-05	0.00542909	yes	XLOC_000502	CG8353
XLOC_000562	ND	D	OK	2.23416	4.75229	1.08889	3.56015	5e-05	0.00542909	yes	XLOC_000562	CG32984
XLOC_000612	ND	D	OK	161.515	127.762	-0.338204	-2.05202	0.00025	0.0224511	yes	XLOC_000612	CG17633
XLOC_000692	ND	D	OK	38.0768	24.9212	-0.61154	-3.19461	5e-05	0.00542909	yes	XLOC_000692	CG18302
XLOC_000737	ND	D	OK	52.1085	73.8739	0.503547	2.94469	5e-05	0.00542909	yes	XLOC_000737	hgo
XLOC_000746	ND	D	OK	1.83513	0	#NAME?	NA	5e-05	0.00542909	yes	XLOC_000746	sala
XLOC_000896	ND	D	OK	37.0461	67.3511	0.862381	4.95029	5e-05	0.00542909	yes	XLOC_000896	Cyp28a5
XLOC_000899	ND	D	OK	2.0952	3.40394	0.700117	2.273	0.0001	0.010122	yes	XLOC_000899	CG4500
XLOC_000919	ND	D	OK	2.33655	6.87038	1.55601	2.57938	0.0001	0.010122	yes	XLOC_000919	CG15282
XLOC_001068	ND	D	OK	25.6605	41.2742	0.685695	3.83748	5e-05	0.00542909	yes	XLOC_001068	ninaD
XLOC_001086	ND	D	OK	5.60936	3.92094	-0.516635	-2.5271	5e-05	0.00542909	yes	XLOC_001086	CG10211
XLOC_001172	ND	D	OK	229.137	289.564	0.337669	2.05425	0.0003	0.0255943	yes	XLOC_001172	CG16772
XLOC_001248	ND	D	OK	69.0055	49.3644	-0.48324	-2.8266	5e-05	0.00542909	yes	XLOC_001248	CG9259
XLOC_001598	ND	D	OK	81.4218	63.7085	-0.353929	-2.11253	5e-05	0.00542909	yes	XLOC_001598	tim
XLOC_001673	ND	D	OK	56.6074	43.012	-0.396252	-2.20749	0.0003	0.0255943	yes	XLOC_001673	Jon25Bi
XLOC_001941	ND	D	OK	12.5653	21.7148	0.78923	4.33844	5e-05	0.00542909	yes	XLOC_001941	CG9463
XLOC_001942	ND	D	OK	1.45106	3.0418	1.06781	3.57231	5e-05	0.00542909	yes	XLOC_001942	CG9465
XLOC_001943	ND	D	OK	32.2803	53.2573	0.722326	4.31313	5e-05	0.00542909	yes	XLOC_001943	CG9466
XLOC_001944	ND	D	OK	54.6251	84.3994	0.627671	3.80197	5e-05	0.00542909	yes	XLOC_001944	CG9468
XLOC_001975	ND	D	OK	45.4538	33.6156	-0.435268	-2.53493	5e-05	0.00542909	yes	XLOC_001975	Cyp4e3
XLOC_002059	ND	D	OK	10.9987	15.0283	0.450353	2.4376	5e-05	0.00542909	yes	XLOC_002059	CG5322
XLOC_002069	ND	D	OK	12.8248	8.52657	-0.588896	-2.00405	0.0005	0.0387792	yes	XLOC_002069	CG7299
XLOC_002192	ND	D	OK	83.0124	60.9722	-0.445175	-2.18828	0.0001	0.010122	yes	XLOC_002192	CG16978
XLOC_002485	ND	D	OK	68.4739	86.8377	0.342767	2.05182	0.0005	0.0387792	yes	XLOC_002485	fon
XLOC_002539	ND	D	OK	135.597	102.235	-0.407432	-2.43517	5e-05	0.00542909	yes	XLOC_002539	CG17571
XLOC_002877	ND	D	OK	45.8823	63.569	0.470384	2.78506	5e-05	0.00542909	yes	XLOC_002877	CG8693
XLOC_003093	ND	D	OK	292.928	388.784	0.408421	2.19108	0.00015	0.0144484	yes	XLOC_003093	CG30035
XLOC_003216	ND	D	OK	87.4116	110.963	0.344185	2.04603	0.00025	0.0224511	yes	XLOC_003216	CG13321
XLOC_003219	ND	D	OK	10.8539	15.3152	0.496754	2.59151	5e-05	0.00542909	yes	XLOC_003219	CG13325
XLOC_003294	ND	D	OK	11.6955	21.6825	0.890583	5.10398	5e-05	0.00542909	yes	XLOC_003294	Mdr50
XLOC_003338	ND	D	OK	2.96347	154.223	5.70159	9.0226	5e-05	0.00542909	yes	XLOC_003338	Dro
XLOC_003339	ND	D	OK	0.278081	5.7678	4.37444	4.32261	0.00035	0.0288303	yes	XLOC_003339	AttA
XLOC_003350	ND	D	OK	89.2694	178.38	0.998713	5.97904	5e-05	0.00542909	yes	XLOC_003350	Cyp6a23
XLOC_003375	ND	D	OK	15.3992	179.896	3.54624	7.5688	5e-05	0.00542909	yes	XLOC_003375	Mtk
XLOC_003392	ND	D	OK	0.808781	2.61729	1.69425	3.63215	5e-05	0.00542909	yes	XLOC_003392	CG30091
XLOC_003394	ND	D	OK	6.42667	10.908	0.763244	2.67804	5e-05	0.00542909	yes	XLOC_003394	CG30090
XLOC_003512	ND	D	OK	11078.5	8452.47	-0.390322	-2.11614	0.0003	0.0255943	yes	XLOC_003512	Acp54A1
XLOC_003595	ND	D	OK	55.4709	81.0696	0.547428	3.2367	5e-05	0.00542909	yes	XLOC_003595	CG10910
XLOC_003649	ND	D	OK	670.069	863.62	0.366087	2.07516	0.00035	0.0288303	yes	XLOC_003649	Pepck
XLOC_003673	ND	D	OK	2.53296	160.99	5.99	11.6187	5e-05	0.00542909	yes	XLOC_003673	Dpt
XLOC_003674	ND	D	OK	4.09853	66.7942	4.02655	8.02406	5e-05	0.00542909	yes	XLOC_003674	DptB
XLOC_003726	ND	D	OK	417.639	665.648	0.672504	2.4078	0.0001	0.010122	yes	XLOC_003726	CG15126
XLOC_003764	ND	D	OK	93.6501	123.713	0.401643	2.13349	0.00025	0.0224511	yes	XLOC_003764	CG13422
XLOC_003932	ND	D	OK	149.95	201.807	0.4285	2.53262	0.0001	0.010122	yes	XLOC_003932	CG13510
XLOC_004080	ND	D	OK	16.15	21.3477	0.402544	2.32907	5e-05	0.00542909	yes	XLOC_004080	CG3376
XLOC_004252	ND	D	OK	148.528	244.284	0.71783	4.31369	5e-05	0.00542909	yes	XLOC_004252	Cyp9b2
XLOC_004339	ND	D	OK	17.365	32.3566	0.897876	4.80354	5e-05	0.00542909	yes	XLOC_004339	CG8708
XLOC_004364	ND	D	OK	55.7953	74.768	0.422278	2.53179	5e-05	0.00542909	yes	XLOC_004364	LvpL
XLOC_004367	ND	D	OK	225.556	314.042	0.477472	2.44301	5e-05	0.00542909	yes	XLOC_004367	CG12780
XLOC_004368	ND	D	OK	10.7959	15.4311	0.515355	2.45912	5e-05	0.00542909	yes	XLOC_004368	Cyp6a14
XLOC_004680	ND	D	OK	325.699	423.734	0.379619	2.28328	5e-05	0.00542909	yes	XLOC_004680	CG13323
XLOC_004681	ND	D	OK	28.2876	45.7773	0.694461	2.8481	5e-05	0.00542909	yes	XLOC_004681	CG13324
XLOC_004727	ND	D	OK	124.508	186.938	0.586319	3.08963	5e-05	0.00542909	yes	XLOC_004727	CG13335
XLOC_004769	ND	D	OK	80.1126	110.623	0.465549	2.79212	5e-05	0.00542909	yes	XLOC_004769	Arc1
XLOC_004810	ND	D	OK	38.1513	57.6566	0.595751	3.47305	5e-05	0.00542909	yes	XLOC_004810	Cyp6a21
XLOC_005022	ND	D	OK	12.5403	21.1731	0.755666	3.12231	5e-05	0.00542909	yes	XLOC_005022	CG5767
XLOC_005026	ND	D	OK	118.957	255.315	1.10184	6.50998	5e-05	0.00542909	yes	XLOC_005026	CG10912
XLOC_005111	ND	D	OK	1520.59	1138.17	-0.417924	-2.44927	5e-05	0.00542909	yes	XLOC_005111	CG16926
XLOC_005305	ND	D	OK	7.83526	21.9818	1.48826	6.28318	5e-05	0.00542909	yes	XLOC_005305	Cht4
XLOC_005355	ND	D	OK	5.06602	11.1655	1.14012	4.22705	5e-05	0.00542909	yes	XLOC_005355	pirk
XLOC_005368	ND	D	OK	92.6137	131.938	0.510561	3.00479	5e-05	0.00542909	yes	XLOC_005368	CG34040
XLOC_005369	ND	D	OK	278.718	352.806	0.340067	2.0565	0.00015	0.0144484	yes	XLOC_005369	CG4363
XLOC_005506	ND	D	OK	66.2498	95.6131	0.529293	2.85232	5e-05	0.00542909	yes	XLOC_005506	IM18
XLOC_005811	ND	D	OK	6.14081	10.1456	0.724355	2.42412	5e-05	0.00542909	yes	XLOC_005811	CG32302
XLOC_005830	ND	D	OK	22.4105	31.4586	0.489284	2.39594	5e-05	0.00542909	yes	XLOC_005830	CG1246
XLOC_005889	ND	D	OK	152.533	220.399	0.530999	2.53869	5e-05	0.00542909	yes	XLOC_005889	Drs
XLOC_006003	ND	D	OK	21.4042	15.1649	-0.497157	-2.67759	5e-05	0.00542909	yes	XLOC_006003	CG5150
XLOC_006078	ND	D	OK	5.25555	14.6761	1.48155	3.25002	5e-05	0.00542909	yes	XLOC_006078	CG15829
XLOC_006123	ND	D	OK	31.9965	56.9805	0.832554	3.3947	5e-05	0.00542909	yes	XLOC_006123	CG32368
XLOC_006240	ND	D	OK	18.1171	25.1977	0.475944	2.11165	0.0002	0.0188094	yes	XLOC_006240	CG33926
XLOC_006317	ND	D	OK	1.61682	0.387347	-2.06146	-2.82201	0.00015	0.0144484	yes	XLOC_006317	Fad2
XLOC_006398	ND	D	OK	60.2954	38.8885	-0.632706	-3.56516	5e-05	0.00542909	yes	XLOC_006398	Lsp2
XLOC_006536	ND	D	OK	1.32949	0	#NAME?	NA	5e-05	0.00542909	yes	XLOC_006536	Brd
XLOC_006593	ND	D	OK	49.0323	75.2652	0.618251	3.5437	5e-05	0.00542909	yes	XLOC_006593	CG10516
XLOC_006627	ND	D	OK	28.2847	43.6548	0.62612	2.59009	5e-05	0.00542909	yes	XLOC_006627	CG13067
XLOC_006694	ND	D	OK	60.6499	78.3254	0.368974	2.08778	0.00035	0.0288303	yes	XLOC_006694	TpnC73F
XLOC_007043	ND	D	OK	48.743	34.0719	-0.516611	-2.09768	0.0004	0.0318507	yes	XLOC_007043	CG34454
XLOC_007373	ND	D	OK	24.8365	19.4365	-0.353688	-1.92556	0.00055	0.0423819	yes	XLOC_007373	CG10592
XLOC_007410	ND	D	OK	409.965	321.587	-0.350292	-2.09214	0.0003	0.0255943	yes	XLOC_007410	Cpr65Au
XLOC_007430	ND	D	OK	25.4264	38.3095	0.591377	3.57498	5e-05	0.00542909	yes	XLOC_007430	CG10226
XLOC_007451	ND	D	OK	123.741	154.902	0.324032	1.96159	0.0005	0.0387792	yes	XLOC_007451	Prat2
XLOC_007669	ND	D	OK	23.1307	32.351	0.484	2.60743	5e-05	0.00542909	yes	XLOC_007669	CG6640
XLOC_007684	ND	D	OK	38.0349	27.1645	-0.4856	-2.11905	0.0003	0.0255943	yes	XLOC_007684	CG14151
XLOC_007708	ND	D	OK	0.891106	0	#NAME?	NA	5e-05	0.00542909	yes	XLOC_007708	CG32071
XLOC_007774	ND	D	OK	3.18031	4.96985	0.644034	3.49544	5e-05	0.00542909	yes	XLOC_007774	Muc68E
XLOC_007775	ND	D	OK	76.1924	118.854	0.641471	3.52112	5e-05	0.00542909	yes	XLOC_007775	CG42397
XLOC_007839	ND	D	OK	23.1494	17.319	-0.418622	-2.09836	0.0004	0.0318507	yes	XLOC_007839	CG11253
XLOC_007913	ND	D	OK	1.9769	0	#NAME?	NA	5e-05	0.00542909	yes	XLOC_007913	BobA
XLOC_008017	ND	D	OK	374.435	477.569	0.350992	2.1	0.0002	0.0188094	yes	XLOC_008017	Pdh
XLOC_008020	ND	D	OK	19.2235	37.2599	0.954751	5.30501	5e-05	0.00542909	yes	XLOC_008020	Cpr72Ec
XLOC_008050	ND	D	OK	48.5969	76.4924	0.654452	3.18957	5e-05	0.00542909	yes	XLOC_008050	PGRP-SB1
XLOC_008259	ND	D	OK	2.0385	4.79533	1.23412	3.1815	5e-05	0.00542909	yes	XLOC_008259	CG7298
XLOC_008283	ND	D	OK	215.908	309.45	0.51929	3.0039	5e-05	0.00542909	yes	XLOC_008283	CG11796
XLOC_008370	ND	D	OK	19.0159	30.8555	0.698321	2.76691	5e-05	0.00542909	yes	XLOC_008370	CG14567
XLOC_008600	ND	D	OK	1.70169	0.251948	-2.75577	-3.3944	5e-05	0.00542909	yes	XLOC_008600	Ama
XLOC_008683	ND	D	OK	7.19892	18.1677	1.33552	4.19241	5e-05	0.00542909	yes	XLOC_008683	CG11671
XLOC_008763	ND	D	OK	9.66382	16.5513	0.776276	3.70456	5e-05	0.00542909	yes	XLOC_008763	CG8147
XLOC_008827	ND	D	OK	3.50733	5.12105	0.546065	2.39959	0.0001	0.010122	yes	XLOC_008827	CG3999
XLOC_008944	ND	D	OK	4.42969	8.24063	0.895549	2.48179	5e-05	0.00542909	yes	XLOC_008944	GstD2
XLOC_008984	ND	D	OK	24.3665	84.3732	1.79189	10.0012	5e-05	0.00542909	yes	XLOC_008984	CG5724
XLOC_009069	ND	D	OK	201.489	152.558	-0.401343	-2.19391	0.00015	0.0144484	yes	XLOC_009069	Cyp313a1
XLOC_009126	ND	D	OK	16.9544	26.0213	0.618031	3.20923	5e-05	0.00542909	yes	XLOC_009126	Act88F
XLOC_009270	ND	D	OK	0.513981	4.16584	3.01882	3.49356	5e-05	0.00542909	yes	XLOC_009270	AttD
XLOC_009353	ND	D	OK	34.6141	47.0433	0.442627	2.59498	5e-05	0.00542909	yes	XLOC_009353	Cyp12a5
XLOC_009420	ND	D	OK	96.2017	171.641	0.835259	2.39181	5e-05	0.00542909	yes	XLOC_009420	MtnD
XLOC_009482	ND	D	OK	13.4653	5.91731	-1.18623	-3.21054	5e-05	0.00542909	yes	XLOC_009482	CheB93b
XLOC_009541	ND	D	OK	165.367	128.737	-0.361246	-2.1286	0.0004	0.0318507	yes	XLOC_009541	CG18594
XLOC_009759	ND	D	OK	247.315	181.261	-0.44828	-2.71618	5e-05	0.00542909	yes	XLOC_009759	CG11892
XLOC_009761	ND	D	OK	117.272	148.2	0.337683	2.05722	0.00035	0.0288303	yes	XLOC_009761	CG31104
XLOC_009763	ND	D	OK	36.8554	85.2469	1.20977	6.98722	5e-05	0.00542909	yes	XLOC_009763	CG11893
XLOC_009764	ND	D	OK	10.6257	21.2175	0.997699	2.22852	0.0003	0.0255943	yes	XLOC_009764	CG13659
XLOC_009800	ND	D	OK	2.1142	3.9525	0.902656	2.41381	0.00015	0.0144484	yes	XLOC_009800	CG31089
XLOC_009943	ND	D	OK	17.0102	25.9965	0.611919	2.85035	5e-05	0.00542909	yes	XLOC_009943	CG33346
XLOC_010053	ND	D	OK	2.90809	10.65	1.87271	2.70181	0.0004	0.0318507	yes	XLOC_010053	CecC
XLOC_010065	ND	D	OK	39.5637	23.8556	-0.729849	-3.61837	5e-05	0.00542909	yes	XLOC_010065	Jon99Fi
XLOC_010187	ND	D	OK	50.348	65.5601	0.380884	2.06451	0.00025	0.0224511	yes	XLOC_010187	CG2022
XLOC_010446	ND	D	OK	33.5492	24.2656	-0.467365	-2.28583	5e-05	0.00542909	yes	XLOC_010446	CG9837
XLOC_010481	ND	D	OK	48.5265	62.3244	0.361023	2.04098	0.00045	0.0355947	yes	XLOC_010481	CG9363
XLOC_010596	ND	D	OK	94.8256	119.12	0.32907	1.99742	0.00065	0.0494497	yes	XLOC_010596	Ugt35b
XLOC_010627	ND	D	OK	41.0268	69.2085	0.754384	3.62411	5e-05	0.00542909	yes	XLOC_010627	CG6830
XLOC_010629	ND	D	OK	45.3267	61.9711	0.451233	2.62998	5e-05	0.00542909	yes	XLOC_010629	CG6908
XLOC_010707	ND	D	OK	5.3917	9.93579	0.881894	3.58801	5e-05	0.00542909	yes	XLOC_010707	CG5999
XLOC_010846	ND	D	OK	25.0074	36.2755	0.536645	3.24775	5e-05	0.00542909	yes	XLOC_010846	CG31304
XLOC_010847	ND	D	OK	24.1395	36.0021	0.576689	2.85804	5e-05	0.00542909	yes	XLOC_010847	CG6934
XLOC_010848	ND	D	OK	7.56531	11.1119	0.554638	2.47901	5e-05	0.00542909	yes	XLOC_010848	CG6912
XLOC_010885	ND	D	OK	88.254	120.341	0.44739	2.54352	5e-05	0.00542909	yes	XLOC_010885	CG14872
XLOC_010942	ND	D	OK	50.9275	31.1974	-0.707017	-4.17825	5e-05	0.00542909	yes	XLOC_010942	CG10345
XLOC_010961	ND	D	OK	11.3247	16.0243	0.500789	2.56344	5e-05	0.00542909	yes	XLOC_010961	CG3590
XLOC_011232	ND	D	OK	121.779	81.1306	-0.585943	-3.08177	5e-05	0.00542909	yes	XLOC_011232	fit
XLOC_011481	ND	D	OK	7.65671	11.0219	0.525581	2.2043	0.00015	0.0144484	yes	XLOC_011481	CG10559
XLOC_011482	ND	D	OK	141.175	178.385	0.337506	2.05399	0.0001	0.010122	yes	XLOC_011482	CG10553
XLOC_011483	ND	D	OK	136.118	185.83	0.449128	2.73266	5e-05	0.00542909	yes	XLOC_011483	CG10560
XLOC_011484	ND	D	OK	29.4146	48.8814	0.732756	4.13538	5e-05	0.00542909	yes	XLOC_011484	CG10562
XLOC_011565	ND	D	OK	376.205	215.756	-0.802118	-4.83658	5e-05	0.00542909	yes	XLOC_011565	CG6295
XLOC_011566	ND	D	OK	23.848	9.59239	-1.31391	-5.59184	5e-05	0.00542909	yes	XLOC_011566	CG17192
XLOC_011569	ND	D	OK	59.0705	84.4421	0.515524	3.01389	5e-05	0.00542909	yes	XLOC_011569	CG6277
XLOC_011694	ND	D	OK	907.701	529.713	-0.777007	-4.63963	5e-05	0.00542909	yes	XLOC_011694	Obp99b
XLOC_011715	ND	D	OK	538.956	425.999	-0.339319	-2.06072	0.00035	0.0288303	yes	XLOC_011715	Jon99Cii
XLOC_011769	ND	D	OK	391.121	306.514	-0.351665	-2.1376	0.0002	0.0188094	yes	XLOC_011769	Jon99Fii
XLOC_011833	ND	D	OK	105.713	82.0266	-0.365982	-2.20204	0.00025	0.0224511	yes	XLOC_011833	salt
XLOC_011835	ND	D	OK	79.7807	115.724	0.536573	3.2482	5e-05	0.00542909	yes	XLOC_011835	Smvt
XLOC_012242	ND	D	OK	9.85264	7.18599	-0.455323	-2.21368	0.0001	0.010122	yes	XLOC_012242	per
XLOC_012498	ND	D	OK	46.1405	67.9051	0.557486	3.21167	5e-05	0.00542909	yes	XLOC_012498	GIIIspla2
XLOC_012550	ND	D	OK	15.9551	6.1691	-1.37089	-2.91078	5e-05	0.00542909	yes	XLOC_012550	CG15369
XLOC_012836	ND	D	OK	38.0441	28.1358	-0.435264	-2.51453	5e-05	0.00542909	yes	XLOC_012836	dob
XLOC_013144	ND	D	OK	8.92523	6.74302	-0.404494	-2.08112	0.0004	0.0318507	yes	XLOC_013144	NPC1b
XLOC_014137	ND	D	OK	107.894	179.372	0.733336	4.27987	5e-05	0.00542909	yes	XLOC_014137	CG15043
XLOC_014295	ND	D	OK	2495.66	3195.13	0.356452	2.06938	0.0003	0.0255943	yes	XLOC_014295	lcs

## Sheet: virgin.vs.mated_NEW
gene_id	sample_1	sample_2	status	value_1	value_2	log2_fold_change	test_stat	p_value	q_value	significant	tracking_id	gene_short_name
XLOC_000002	ND	D	OK	19.5067	14.9969	-0.379303	-1.70091	0.0035	0.0123856	yes	XLOC_000002	dbr
XLOC_000005	ND	D	OK	26.1331	17.3244	-0.593073	-2.68574	5e-05	0.000273369	yes	XLOC_000005	CG11376
XLOC_000011	ND	D	OK	89.8617	38.8984	-1.20799	-4.3047	5e-05	0.000273369	yes	XLOC_000011	spen
XLOC_000017	ND	D	OK	21.1103	14.4987	-0.542023	-2.03659	0.0003	0.00140992	yes	XLOC_000017	smo
XLOC_000020	ND	D	OK	45.3832	32.6161	-0.476574	-2.14636	0.00015	0.000751259	yes	XLOC_000020	Pi3K21B
XLOC_000021	ND	D	OK	35.9415	20.2072	-0.83078	-1.54781	0.01625	0.0458308	yes	XLOC_000021	Plc21C
XLOC_000025	ND	D	OK	51.5633	33.6801	-0.614445	-2.45582	5e-05	0.000273369	yes	XLOC_000025	ebi
XLOC_000031	ND	D	OK	0.67647	1.38122	1.02985	1.84374	0.00275	0.0100398	yes	XLOC_000031	CG4133
XLOC_000032	ND	D	OK	27.4327	20.7462	-0.403048	-1.78653	0.0019	0.00724974	yes	XLOC_000032	MED15
XLOC_000033	ND	D	OK	13.6715	8.84505	-0.62823	-2.73709	5e-05	0.000273369	yes	XLOC_000033	ush
XLOC_000034	ND	D	OK	6.1992	9.83291	0.665538	2.05959	0.0006	0.00262067	yes	XLOC_000034	nAcRbeta-21C
XLOC_000035	ND	D	OK	173.932	252.373	0.537039	2.43948	5e-05	0.000273369	yes	XLOC_000035	CG2789
XLOC_000037	ND	D	OK	24.4375	15.4429	-0.662152	-2.97749	5e-05	0.000273369	yes	XLOC_000037	CG2807
XLOC_000047	ND	D	OK	31.9328	61.2093	0.938713	2.5102	5e-05	0.000273369	yes	XLOC_000047	CG13947
XLOC_000053	ND	D	OK	25.6004	18.6823	-0.454496	-1.70608	0.00295	0.0106777	yes	XLOC_000053	Clp
XLOC_000054	ND	D	OK	181.998	233.579	0.359982	1.47739	0.00945	0.0287124	yes	XLOC_000054	CG3662
XLOC_000055	ND	D	OK	29.2795	17.8886	-0.710846	-3.19399	5e-05	0.000273369	yes	XLOC_000055	dock
XLOC_000056	ND	D	OK	65.9923	92.5988	0.488696	2.21445	0.00015	0.000751259	yes	XLOC_000056	kraken
XLOC_000061	ND	D	OK	73.6808	216.586	1.55558	6.5096	5e-05	0.000273369	yes	XLOC_000061	Lsp1beta
XLOC_000071	ND	D	OK	11.955	15.3002	0.355941	1.4697	0.0114	0.0338463	yes	XLOC_000071	CG4577
XLOC_000082	ND	D	OK	7.92888	12.2244	0.624573	2.22619	0.0001	0.000521172	yes	XLOC_000082	CG5001
XLOC_000083	ND	D	OK	78.6082	143.514	0.868439	3.90835	5e-05	0.000273369	yes	XLOC_000083	CG5011
XLOC_000086	ND	D	OK	9.31184	12.9166	0.472091	1.7522	0.00235	0.00873349	yes	XLOC_000086	CG5397
XLOC_000093	ND	D	OK	19.254	25.3536	0.397031	1.44837	0.0116	0.0343696	yes	XLOC_000093	CG31928
XLOC_000096	ND	D	OK	17.7332	25.4319	0.520191	1.86624	0.00095	0.00393422	yes	XLOC_000096	CG31661
XLOC_000100	ND	D	OK	21.7084	14.7112	-0.561342	-1.90916	0.001	0.00411942	yes	XLOC_000100	CG14352
XLOC_000106	ND	D	OK	51.6954	67.4697	0.384204	1.70463	0.00285	0.0103675	yes	XLOC_000106	CG17646
XLOC_000111	ND	D	OK	69.2046	37.315	-0.891113	-3.70236	5e-05	0.000273369	yes	XLOC_000111	CG7337
XLOC_000116	ND	D	OK	163.085	229.512	0.49294	2.24837	0.0003	0.00140992	yes	XLOC_000116	Npc2a
XLOC_000120	ND	D	OK	24.0074	16.727	-0.521296	-2.33157	5e-05	0.000273369	yes	XLOC_000120	CG4238
XLOC_000122	ND	D	OK	59.9511	39.3007	-0.609231	-2.66897	5e-05	0.000273369	yes	XLOC_000122	Su(dx)
XLOC_000127	ND	D	OK	58.0078	42.68	-0.442687	-1.81352	0.0018	0.00691238	yes	XLOC_000127	AIF,CG7261
XLOC_000131	ND	D	OK	13.4338	8.72316	-0.622947	-2.47043	5e-05	0.000273369	yes	XLOC_000131	mio
XLOC_000140	ND	D	OK	1.17631	5.51792	2.22986	2.16081	0.0039	0.0135598	yes	XLOC_000140	CG16995
XLOC_000141	ND	D	OK	7.00499	4.54731	-0.623369	-2.23166	0.00015	0.000751259	yes	XLOC_000141	eys
XLOC_000142	ND	D	OK	26.1157	11.0583	-1.23978	-2.39123	0.0004	0.00182656	yes	XLOC_000142	CG4272
XLOC_000144	ND	D	OK	12.6809	9.62117	-0.398371	-1.68555	0.00385	0.0134135	yes	XLOC_000144	CG9866
XLOC_000147	ND	D	OK	3.60349	2.66878	-0.433213	-1.4209	0.0146	0.0418286	yes	XLOC_000147	VGlut
XLOC_000151	ND	D	OK	35.768	27.4441	-0.382173	-1.63047	0.00465	0.0156939	yes	XLOC_000151	oaf
XLOC_000152	ND	D	OK	31.9494	23.7703	-0.426629	-1.77819	0.00185	0.00708026	yes	XLOC_000152	CG9883
XLOC_000154	ND	D	OK	9.03136	16.9111	0.904959	2.07173	0.0006	0.00262067	yes	XLOC_000154	CG15394
XLOC_000164	ND	D	OK	396.329	522.821	0.399619	1.65081	0.0046	0.0155614	yes	XLOC_000164	CG9894
XLOC_000169	ND	D	OK	15.38	26.5052	0.785223	3.41657	5e-05	0.000273369	yes	XLOC_000169	daw
XLOC_000180	ND	D	OK	49.3523	18.8564	-1.38806	-5.59748	5e-05	0.000273369	yes	XLOC_000180	lilli
XLOC_000185	ND	D	OK	37.2541	25.3338	-0.556334	-2.49425	5e-05	0.000273369	yes	XLOC_000185	CG3558
XLOC_000188	ND	D	OK	21.2865	15.3201	-0.474519	-2.09442	0.00035	0.00161865	yes	XLOC_000188	CG3542
XLOC_000193	ND	D	OK	62.6621	37.2073	-0.752008	-3.11435	5e-05	0.000273369	yes	XLOC_000193	v(2)k05816
XLOC_000195	ND	D	OK	701.24	491.958	-0.511372	-1.58579	0.00645	0.020767	yes	XLOC_000195	CG3523
XLOC_000204	ND	D	OK	30.3093	44.652	0.558966	2.40467	5e-05	0.000273369	yes	XLOC_000204	CG15406
XLOC_000205	ND	D	OK	1.88331	2.83947	0.592351	1.39416	0.0166	0.0466622	yes	XLOC_000205	CG3277
XLOC_000206	ND	D	OK	5.80672	12.2452	1.07642	3.18234	5e-05	0.000273369	yes	XLOC_000206	CG8837
XLOC_000217	ND	D	OK	62.4077	46.492	-0.42474	-1.79361	0.0013	0.00518263	yes	XLOC_000217	CG12795
XLOC_000219	ND	D	OK	198	243.834	0.300395	1.37011	0.01665	0.0467768	yes	XLOC_000219	Pdsw
XLOC_000221	ND	D	OK	5.75825	9.0375	0.650294	2.27121	0.0002	0.000976131	yes	XLOC_000221	pgant4
XLOC_000222	ND	D	OK	381.106	583.497	0.614532	2.64231	5e-05	0.000273369	yes	XLOC_000222	Thor
XLOC_000227	ND	D	OK	3.07209	5.48629	0.836612	2.47378	0.0001	0.000521172	yes	XLOC_000227	drm
XLOC_000243	ND	D	OK	9.78922	7.43755	-0.396366	-1.75152	0.0023	0.00856651	yes	XLOC_000243	CG3921
XLOC_000244	ND	D	OK	26.5133	19.0853	-0.474255	-2.04553	0.0004	0.00182656	yes	XLOC_000244	l(2)k16918
XLOC_000247	ND	D	OK	1.86959	1.16445	-0.683069	-1.60107	0.0075	0.0236007	yes	XLOC_000247	CG3964
XLOC_000248	ND	D	OK	13.0276	9.84972	-0.403417	-1.64274	0.0038	0.0132575	yes	XLOC_000248	Cep97
XLOC_000249	ND	D	OK	94.4573	126.588	0.422404	1.55365	0.0078	0.0243483	yes	XLOC_000249	CG34176
XLOC_000250	ND	D	OK	70.4092	107.808	0.614632	1.78102	0.0036	0.0127084	yes	XLOC_000250	CG15422
XLOC_000251	ND	D	OK	43.8519	73.0515	0.736274	2.64652	5e-05	0.000273369	yes	XLOC_000251	CG15423
XLOC_000253	ND	D	OK	63.7437	30.5545	-1.0609	-4.52092	5e-05	0.000273369	yes	XLOC_000253	ed
XLOC_000256	ND	D	OK	3.08243	4.70667	0.61064	1.77555	0.00275	0.0100398	yes	XLOC_000256	Sr-CI
XLOC_000258	ND	D	OK	5.49784	8.6616	0.655767	1.74552	0.00235	0.00873349	yes	XLOC_000258	lectin-24Db
XLOC_000261	ND	D	OK	9.26248	5.9851	-0.630023	-2.54617	5e-05	0.000273369	yes	XLOC_000261	tutl
XLOC_000262	ND	D	OK	7.12244	10.1109	0.505465	1.86836	0.00105	0.00429572	yes	XLOC_000262	CG16857
XLOC_000266	ND	D	OK	297.39	490.355	0.72147	2.72313	5e-05	0.000273369	yes	XLOC_000266	Tps1
XLOC_000267	ND	D	OK	38.6215	24.228	-0.672729	-3.02579	5e-05	0.000273369	yes	XLOC_000267	l(2)k05819
XLOC_000274	ND	D	OK	11.0771	7.19391	-0.622728	-1.64242	0.0069	0.0220062	yes	XLOC_000274	CG15435
XLOC_000275	ND	D	OK	15.7539	10.9032	-0.530958	-1.79052	0.0015	0.00588283	yes	XLOC_000275	CG15436
XLOC_000281	ND	D	OK	0	1.74143	Inf	NA	5e-05	0.000273369	yes	XLOC_000281	CG15634
XLOC_000284	ND	D	OK	2.6122	4.38506	0.747331	1.74115	0.00375	0.0131147	yes	XLOC_000284	CG3294
XLOC_000285	ND	D	OK	3.46537	5.94094	0.77768	1.50074	0.00985	0.0297672	yes	XLOC_000285	CG15629
XLOC_000287	ND	D	OK	10.6938	21.6181	1.01547	3.71877	5e-05	0.000273369	yes	XLOC_000287	CG12194
XLOC_000293	ND	D	OK	40.6281	69.3614	0.771655	3.41024	5e-05	0.000273369	yes	XLOC_000293	CG3036
XLOC_000304	ND	D	OK	43.5149	24.3388	-0.838253	-3.69942	5e-05	0.000273369	yes	XLOC_000304	CG34126
XLOC_000306	ND	D	OK	92.1983	71.1522	-0.373831	-1.5177	0.00805	0.0250132	yes	XLOC_000306	Cg25C
XLOC_000310	ND	D	OK	200.928	249.104	0.310074	1.36677	0.01615	0.0455741	yes	XLOC_000310	His3.3A
XLOC_000311	ND	D	OK	14.0223	18.8052	0.423403	1.77087	0.0018	0.00691238	yes	XLOC_000311	qtc
XLOC_000315	ND	D	OK	7.11943	3.7116	-0.939719	-2.15297	0.00015	0.000751259	yes	XLOC_000315	CG14035
XLOC_000316	ND	D	OK	76.7631	48.4878	-0.662792	-1.5849	0.00445	0.0151297	yes	XLOC_000316	Msp-300,snmRNA:128,snmRNA:765
XLOC_000321	ND	D	OK	121.86	161.581	0.407034	1.78694	0.0015	0.00588283	yes	XLOC_000321	Cyp28d1
XLOC_000327	ND	D	OK	22.4076	11.3814	-0.977305	-4.29275	5e-05	0.000273369	yes	XLOC_000327	Bub1
XLOC_000329	ND	D	OK	712.547	919.259	0.367487	1.53875	0.0076	0.023834	yes	XLOC_000329	cype
XLOC_000340	ND	D	OK	71.9631	55.386	-0.377738	-1.6537	0.00425	0.0145571	yes	XLOC_000340	Lam
XLOC_000341	ND	D	OK	13.7974	27.5899	0.999742	3.61088	5e-05	0.000273369	yes	XLOC_000341	Oscillin
XLOC_000355	ND	D	OK	14.976	10.4036	-0.525572	-1.94376	0.001	0.00411942	yes	XLOC_000355	CG7239
XLOC_000359	ND	D	OK	8.79189	5.13592	-0.775551	-3.36351	5e-05	0.000273369	yes	XLOC_000359	bchs
XLOC_000361	ND	D	OK	343.032	437.958	0.352451	1.40508	0.01475	0.0421868	yes	XLOC_000361	Gpdh
XLOC_000363	ND	D	OK	904.089	1566.83	0.79331	3.39536	5e-05	0.000273369	yes	XLOC_000363	Vm26Ab
XLOC_000372	ND	D	OK	102.823	78.5052	-0.389296	-1.74501	0.0025	0.00922335	yes	XLOC_000372	CG9135
XLOC_000381	ND	D	OK	187.445	145.865	-0.361832	-1.55383	0.00675	0.0216026	yes	XLOC_000381	stai
XLOC_000393	ND	D	OK	61.8466	21.9134	-1.49688	-6.39435	5e-05	0.000273369	yes	XLOC_000393	Gef26
XLOC_000396	ND	D	OK	6.98832	11.3131	0.694981	2.47695	5e-05	0.000273369	yes	XLOC_000396	CG9505
XLOC_000397	ND	D	OK	22.0829	11.0291	-1.00162	-4.4409	5e-05	0.000273369	yes	XLOC_000397	slam
XLOC_000401	ND	D	OK	28.9309	36.3587	0.329692	1.44947	0.01165	0.0344775	yes	XLOC_000401	CG9526
XLOC_000402	ND	D	OK	49.5842	19.1601	-1.37177	-5.84611	5e-05	0.000273369	yes	XLOC_000402	DLP
XLOC_000403	ND	D	OK	41.7367	55.8126	0.419273	1.39223	0.016	0.0452389	yes	XLOC_000403	epsilonCOP
XLOC_000410	ND	D	OK	66.5279	89.9391	0.434989	1.9398	0.0005	0.00222999	yes	XLOC_000410	CG11050
XLOC_000412	ND	D	OK	48.9068	32.9956	-0.567762	-2.49193	5e-05	0.000273369	yes	XLOC_000412	Tango1
XLOC_000413	ND	D	OK	27.3879	19.676	-0.477099	-2.13515	0.00015	0.000751259	yes	XLOC_000413	CG11070
XLOC_000416	ND	D	OK	40.5994	16.8152	-1.27169	-5.61173	5e-05	0.000273369	yes	XLOC_000416	Liprin-alpha
XLOC_000422	ND	D	OK	17.2223	32.9542	0.936181	3.46934	5e-05	0.000273369	yes	XLOC_000422	CG11236
XLOC_000424	ND	D	OK	57.9177	39.7356	-0.543575	-2.42132	5e-05	0.000273369	yes	XLOC_000424	Rca1
XLOC_000425	ND	D	OK	39.7961	19.5591	-1.02478	-4.52327	5e-05	0.000273369	yes	XLOC_000425	l(2)k09022
XLOC_000427	ND	D	OK	23.7207	15.7983	-0.586381	-1.99225	0.0005	0.00222999	yes	XLOC_000427	Rat1
XLOC_000428	ND	D	OK	373.635	288.72	-0.371961	-1.47108	0.01105	0.0329228	yes	XLOC_000428	Hrb27C
XLOC_000429	ND	D	OK	17.6514	12.2497	-0.527032	-2.17362	5e-05	0.000273369	yes	XLOC_000429	SA
XLOC_000430	ND	D	OK	35.9629	25.9683	-0.469754	-1.91165	0.0007	0.00300059	yes	XLOC_000430	CG3430
XLOC_000437	ND	D	OK	76.8056	46.8249	-0.713937	-2.91308	5e-05	0.000273369	yes	XLOC_000437	milt
XLOC_000439	ND	D	OK	40.8316	22.8672	-0.836402	-3.41394	5e-05	0.000273369	yes	XLOC_000439	Mnn1
XLOC_000449	ND	D	OK	40.4123	75.9927	0.911067	3.97543	5e-05	0.000273369	yes	XLOC_000449	CG5171
XLOC_000450	ND	D	OK	35.0836	52.3033	0.576104	2.46235	5e-05	0.000273369	yes	XLOC_000450	CG5177
XLOC_000451	ND	D	OK	10.2543	14.9541	0.544316	1.82008	0.0016	0.00623883	yes	XLOC_000451	CG15818
XLOC_000452	ND	D	OK	18.0771	12.3586	-0.548645	-2.36203	0.0001	0.000521172	yes	XLOC_000452	chm
XLOC_000455	ND	D	OK	80.7106	102.178	0.34025	1.50693	0.0096	0.0291158	yes	XLOC_000455	CG5261
XLOC_000456	ND	D	OK	76.6403	112.384	0.55226	2.45694	0.0001	0.000521172	yes	XLOC_000456	CG5973
XLOC_000460	ND	D	OK	2.21983	3.69129	0.733678	1.61282	0.00445	0.0151297	yes	XLOC_000460	Cyp4d21
XLOC_000463	ND	D	OK	4.69481	6.90177	0.5559	2.16344	0.0002	0.000976131	yes	XLOC_000463	TepIII
XLOC_000469	ND	D	OK	17.1733	58.4269	1.76646	6.98907	5e-05	0.000273369	yes	XLOC_000469	Uro
XLOC_000471	ND	D	OK	33.1282	21.1846	-0.64504	-2.89127	5e-05	0.000273369	yes	XLOC_000471	CG7154
XLOC_000474	ND	D	OK	42.5177	31.4228	-0.436253	-1.94749	0.0006	0.00262067	yes	XLOC_000474	CG7115
XLOC_000477	ND	D	OK	39.122	63.4256	0.697083	2.89769	5e-05	0.000273369	yes	XLOC_000477	lectin-28C
XLOC_000481	ND	D	OK	128.211	189.711	0.565284	2.29413	0.0002	0.000976131	yes	XLOC_000481	CG7224
XLOC_000484	ND	D	OK	53.9366	32.3098	-0.739291	-2.357	0.0001	0.000521172	yes	XLOC_000484	Cka
XLOC_000486	ND	D	OK	23.7961	9.34647	-1.34823	-1.58612	0.0063	0.0203421	yes	XLOC_000486	CG7466
XLOC_000495	ND	D	OK	18.7031	11.1933	-0.740641	-3.27081	5e-05	0.000273369	yes	XLOC_000495	CG8486
XLOC_000501	ND	D	OK	44.7432	82.8481	0.8888	3.39314	5e-05	0.000273369	yes	XLOC_000501	CG8360
XLOC_000502	ND	D	OK	8.7768	16.7756	0.934599	2.2589	0.0003	0.00140992	yes	XLOC_000502	CG8353
XLOC_000509	ND	D	OK	22.0641	14.714	-0.58451	-2.58658	5e-05	0.000273369	yes	XLOC_000509	CG7806
XLOC_000511	ND	D	OK	27.0684	39.8972	0.559676	2.02602	0.00025	0.00119769	yes	XLOC_000511	CG14275
XLOC_000512	ND	D	OK	1.31134	2.59636	0.985443	1.71595	0.0062	0.0201024	yes	XLOC_000512	CG14274
XLOC_000514	ND	D	OK	43.6787	76.7268	0.812801	3.62859	5e-05	0.000273369	yes	XLOC_000514	CG7778
XLOC_000515	ND	D	OK	8.39215	15.3615	0.872206	3.0126	5e-05	0.000273369	yes	XLOC_000515	Mur29B
XLOC_000522	ND	D	OK	33.0825	44.1576	0.416592	1.84903	0.00165	0.00640425	yes	XLOC_000522	CG13384
XLOC_000527	ND	D	OK	83.8531	54.5245	-0.620961	-2.64568	5e-05	0.000273369	yes	XLOC_000527	emb
XLOC_000529	ND	D	OK	108.489	77.33	-0.488453	-1.42737	0.01395	0.0402277	yes	XLOC_000529	Chrac-14,mus201
XLOC_000531	ND	D	OK	20.6802	15.7874	-0.389476	-1.58206	0.00665	0.0213162	yes	XLOC_000531	fu2
XLOC_000539	ND	D	OK	108.02	182.655	0.757823	3.3546	5e-05	0.000273369	yes	XLOC_000539	CG13091
XLOC_000540	ND	D	OK	55.5034	81.19	0.548726	2.43777	5e-05	0.000273369	yes	XLOC_000540	Acer
XLOC_000541	ND	D	OK	16.765	23.4845	0.48626	1.85348	0.00125	0.00500493	yes	XLOC_000541	CG17834
XLOC_000543	ND	D	OK	10.4314	5.38494	-0.953925	-3.90144	5e-05	0.000273369	yes	XLOC_000543	Sema-1a
XLOC_000559	ND	D	OK	68.2529	100.15	0.553203	2.42344	5e-05	0.000273369	yes	XLOC_000559	Tsp29Fa
XLOC_000560	ND	D	OK	163.038	257.582	0.659823	2.96027	5e-05	0.000273369	yes	XLOC_000560	Tsp29Fb
XLOC_000565	ND	D	OK	13.0936	25.8771	0.982821	3.08994	5e-05	0.000273369	yes	XLOC_000565	CG9555
XLOC_000568	ND	D	OK	148.039	294.006	0.989873	4.33749	5e-05	0.000273369	yes	XLOC_000568	CG9568
XLOC_000569	ND	D	OK	13.1077	19.6523	0.584287	2.16971	0.00035	0.00161865	yes	XLOC_000569	CG13102
XLOC_000574	ND	D	OK	4.57142	7.02821	0.620516	1.99382	0.0006	0.00262067	yes	XLOC_000574	CG32982
XLOC_000576	ND	D	OK	23.3077	13.6213	-0.77494	-3.39418	5e-05	0.000273369	yes	XLOC_000576	tai
XLOC_000577	ND	D	OK	91.1672	137.782	0.595799	1.93737	0.0009	0.00375012	yes	XLOC_000577	Ggamma30A
XLOC_000579	ND	D	OK	83.6083	59.1838	-0.498443	-2.23744	0.0002	0.000976131	yes	XLOC_000579	Cks30A
XLOC_000584	ND	D	OK	247.928	315.01	0.345479	1.39841	0.0157	0.0445522	yes	XLOC_000584	Aldh
XLOC_000587	ND	D	OK	21.8846	14.0408	-0.640289	-2.82623	5e-05	0.000273369	yes	XLOC_000587	scat
XLOC_000591	ND	D	OK	53.0156	23.5398	-1.17132	-5.07203	5e-05	0.000273369	yes	XLOC_000591	CG33298
XLOC_000592	ND	D	OK	38.6173	23.9453	-0.689506	-3.08624	5e-05	0.000273369	yes	XLOC_000592	Oatp30B
XLOC_000594	ND	D	OK	3.74124	6.119	0.709778	1.87081	0.0019	0.00724974	yes	XLOC_000594	CG17855
XLOC_000596	ND	D	OK	16.5323	31.9685	0.951365	2.75727	5e-05	0.000273369	yes	XLOC_000596	CG13113
XLOC_000597	ND	D	OK	41.8818	73.1317	0.804175	3.34482	5e-05	0.000273369	yes	XLOC_000597	CG13114
XLOC_000599	ND	D	OK	5.46323	9.54478	0.80496	2.41906	5e-05	0.000273369	yes	XLOC_000599	CG3841
XLOC_000603	ND	D	OK	44.0821	30.5848	-0.52738	-2.11003	5e-05	0.000273369	yes	XLOC_000603	CG15828
XLOC_000608	ND	D	OK	23.9117	42.0271	0.813604	1.43608	0.014	0.0403146	yes	XLOC_000608	CG13117
XLOC_000609	ND	D	OK	28.7943	21.1549	-0.444789	-1.78138	0.0018	0.00691238	yes	XLOC_000609	zf30C
XLOC_000612	ND	D	OK	188.516	313.394	0.733292	3.11789	5e-05	0.000273369	yes	XLOC_000612	CG17633
XLOC_000614	ND	D	OK	7.36519	11.185	0.602771	1.54746	0.0078	0.0243483	yes	XLOC_000614	CG4036
XLOC_000618	ND	D	OK	53.6911	40.2266	-0.416533	-1.87217	0.00165	0.00640425	yes	XLOC_000618	Srp54
XLOC_000619	ND	D	OK	193.76	277.027	0.515759	1.72178	0.00235	0.00873349	yes	XLOC_000619	yip2
XLOC_000622	ND	D	OK	30.322	44.4578	0.552071	2.13694	0.0002	0.000976131	yes	XLOC_000622	CG4592
XLOC_000629	ND	D	OK	0.947009	1.8187	0.941457	1.93288	0.0016	0.00623883	yes	XLOC_000629	bib
XLOC_000631	ND	D	OK	44.1552	58.7299	0.411511	1.86011	0.0017	0.00657066	yes	XLOC_000631	Trp1
XLOC_000634	ND	D	OK	31.8576	47.4012	0.573288	2.45804	5e-05	0.000273369	yes	XLOC_000634	CG33301
XLOC_000636	ND	D	OK	372.207	258.059	-0.528404	-2.0569	0.0002	0.000976131	yes	XLOC_000636	Pen
XLOC_000637	ND	D	OK	4.58242	8.10179	0.822131	1.92448	0.00095	0.00393422	yes	XLOC_000637	CG4804
XLOC_000646	ND	D	OK	1383.02	1060.57	-0.382993	-1.39657	0.01685	0.047234	yes	XLOC_000646	me31B
XLOC_000649	ND	D	OK	84.9033	110.691	0.382643	1.6379	0.00495	0.0165304	yes	XLOC_000649	CG18619
XLOC_000656	ND	D	OK	2.03128	3.91809	0.947762	1.71865	0.00395	0.0136914	yes	XLOC_000656	CG4995
XLOC_000658	ND	D	OK	31.0255	22.9917	-0.432337	-1.95279	0.00105	0.00429572	yes	XLOC_000658	GATAd
XLOC_000664	ND	D	OK	120.874	77.4483	-0.642196	-2.85388	5e-05	0.000273369	yes	XLOC_000664	pim
XLOC_000665	ND	D	OK	7.13851	11.6697	0.70907	2.007	0.00065	0.00281122	yes	XLOC_000665	lft
XLOC_000667	ND	D	OK	1.20858	2.42429	1.00425	1.97578	0.00145	0.00571103	yes	XLOC_000667	dpr19
XLOC_000668	ND	D	OK	42.5692	65.8154	0.628616	2.80533	5e-05	0.000273369	yes	XLOC_000668	CG5091,CG5096
XLOC_000670	ND	D	OK	55.2636	37.5254	-0.558463	-2.48844	5e-05	0.000273369	yes	XLOC_000670	da
XLOC_000671	ND	D	OK	70.5958	54.4108	-0.375689	-1.63422	0.00425	0.0145571	yes	XLOC_000671	CG31716
XLOC_000682	ND	D	OK	22.5557	16.0868	-0.487617	-1.70372	0.00365	0.0128402	yes	XLOC_000682	CG13142
XLOC_000683	ND	D	OK	1.36362	2.12893	0.642687	1.42918	0.01555	0.0441883	yes	XLOC_000683	CG6232
XLOC_000684	ND	D	OK	71.4265	108.319	0.600761	2.54642	5e-05	0.000273369	yes	XLOC_000684	CG6206
XLOC_000690	ND	D	OK	26.0811	54.7222	1.06912	4.6028	5e-05	0.000273369	yes	XLOC_000690	Lip4
XLOC_000703	ND	D	OK	10.0897	18.5187	0.876092	1.66228	0.0062	0.0201024	yes	XLOC_000703	CG17107
XLOC_000708	ND	D	OK	23.551	15.0876	-0.642427	-2.84195	5e-05	0.000273369	yes	XLOC_000708	CG12299
XLOC_000709	ND	D	OK	8.93944	13.3446	0.577999	2.24916	0.0004	0.00182656	yes	XLOC_000709	CG6495
XLOC_000719	ND	D	OK	24.8826	19.2155	-0.372866	-1.45888	0.012	0.0354306	yes	XLOC_000719	YL-1
XLOC_000720	ND	D	OK	22.7961	36.235	0.668597	2.35167	5e-05	0.000273369	yes	XLOC_000720	CG16743
XLOC_000722	ND	D	OK	22.4687	12.1864	-0.882648	-2.99245	5e-05	0.000273369	yes	XLOC_000722	CG12253
XLOC_000723	ND	D	OK	44.5954	32.695	-0.447824	-2.01595	0.00065	0.00281122	yes	XLOC_000723	CG16833
XLOC_000725	ND	D	OK	56.8966	33.6673	-0.756994	-3.16845	5e-05	0.000273369	yes	XLOC_000725	Nup154
XLOC_000730	ND	D	OK	0	2.2864	Inf	NA	5e-05	0.000273369	yes	XLOC_000730	CG14915
XLOC_000733	ND	D	OK	16.3642	12.1097	-0.434382	-1.60862	0.0054	0.0178161	yes	XLOC_000733	l(2)gd1
XLOC_000736	ND	D	OK	20.9825	9.66335	-1.11859	-4.91298	5e-05	0.000273369	yes	XLOC_000736	CG4751
XLOC_000737	ND	D	OK	13.7656	28.1025	1.02963	3.8012	5e-05	0.000273369	yes	XLOC_000737	hgo
XLOC_000738	ND	D	OK	25.7377	17.0345	-0.595421	-2.19795	0.00015	0.000751259	yes	XLOC_000738	CG4788
XLOC_000742	ND	D	OK	47.2576	27.1612	-0.799001	-2.667	5e-05	0.000273369	yes	XLOC_000742	CG33695
XLOC_000743	ND	D	OK	35.1729	44.4877	0.338941	1.43005	0.01285	0.0375359	yes	XLOC_000743	Ppt2
XLOC_000746	ND	D	OK	0	5.46497	Inf	NA	5e-05	0.000273369	yes	XLOC_000746	sala
XLOC_000753	ND	D	OK	16.8209	25.1696	0.581427	2.49813	5e-05	0.000273369	yes	XLOC_000753	CG12602
XLOC_000754	ND	D	OK	69.3385	48.9833	-0.501366	-2.10024	0.0005	0.00222999	yes	XLOC_000754	CG14931
XLOC_000760	ND	D	OK	112.643	182.721	0.697889	1.52889	0.00865	0.0266247	yes	XLOC_000760	CG14933
XLOC_000762	ND	D	OK	41.5968	65.8613	0.662958	1.44137	0.01425	0.0409299	yes	XLOC_000762	CG14935
XLOC_000768	ND	D	OK	3.96467	7.37763	0.895957	2.67565	5e-05	0.000273369	yes	XLOC_000768	CG16965
XLOC_000775	ND	D	OK	50.4143	69.8053	0.469503	1.43991	0.0141	0.0405565	yes	XLOC_000775	CG12264
XLOC_000776	ND	D	OK	12.2848	20.0341	0.705584	2.43195	0.0001	0.000521172	yes	XLOC_000776	Rh5
XLOC_000777	ND	D	OK	44.4141	56.154	0.338373	1.52496	0.00825	0.0255408	yes	XLOC_000777	l(2)01810
XLOC_000786	ND	D	OK	16.3259	38.4593	1.23617	4.32233	5e-05	0.000273369	yes	XLOC_000786	CG16996
XLOC_000787	ND	D	OK	29.5421	47.9154	0.697714	2.61261	5e-05	0.000273369	yes	XLOC_000787	CG16997
XLOC_000793	ND	D	OK	265.958	188.452	-0.497	-1.93936	0.00095	0.00393422	yes	XLOC_000793	aret
XLOC_000803	ND	D	OK	8.3878	12.5826	0.585068	2.1952	0.0003	0.00140992	yes	XLOC_000803	Oatp33Eb
XLOC_000805	ND	D	OK	4.73464	7.70881	0.703255	2.49786	5e-05	0.000273369	yes	XLOC_000805	nub
XLOC_000811	ND	D	OK	81.1893	62.179	-0.384862	-1.40226	0.0174	0.0486012	yes	XLOC_000811	MRP
XLOC_000818	ND	D	OK	39.2058	15.6038	-1.32917	-5.73213	5e-05	0.000273369	yes	XLOC_000818	Tor
XLOC_000823	ND	D	OK	39.7953	23.0407	-0.788412	-2.91244	5e-05	0.000273369	yes	XLOC_000823	Sir2
XLOC_000827	ND	D	OK	114.933	148.662	0.371237	1.55399	0.0058	0.0189509	yes	XLOC_000827	Pect
XLOC_000830	ND	D	OK	31.0841	23.5944	-0.397736	-1.70484	0.00305	0.0109692	yes	XLOC_000830	CG16812
XLOC_000834	ND	D	OK	76.2401	110.139	0.530708	2.39044	5e-05	0.000273369	yes	XLOC_000834	CG5867
XLOC_000835	ND	D	OK	163.99	220.505	0.427201	1.91854	0.00075	0.0031853	yes	XLOC_000835	CG5945
XLOC_000837	ND	D	OK	2.58594	4.56172	0.818892	1.79318	0.0027	0.00987857	yes	XLOC_000837	CG16820
XLOC_000846	ND	D	OK	1041.64	1587.47	0.607867	2.27278	0.0001	0.000521172	yes	XLOC_000846	CG16826
XLOC_000853	ND	D	OK	7.46314	3.34058	-1.15968	-4.49193	5e-05	0.000273369	yes	XLOC_000853	CG7099
XLOC_000854	ND	D	OK	23.0326	15.5073	-0.570729	-2.53196	5e-05	0.000273369	yes	XLOC_000854	CG7110
XLOC_000869	ND	D	OK	42.3139	20.8713	-1.01961	-4.44569	5e-05	0.000273369	yes	XLOC_000869	kuz
XLOC_000870	ND	D	OK	12.4499	16.5432	0.410103	1.56462	0.0079	0.0246226	yes	XLOC_000870	CG18507
XLOC_000872	ND	D	OK	0.314286	18.0046	5.84014	4.75626	0.00305	0.0109692	yes	XLOC_000872	CG31813
XLOC_000876	ND	D	OK	36.9852	27.561	-0.42432	-1.64777	0.0044	0.0149999	yes	XLOC_000876	CG31731
XLOC_000878	ND	D	OK	33.7937	16.9192	-0.998095	-4.44653	5e-05	0.000273369	yes	XLOC_000878	sec71
XLOC_000881	ND	D	OK	36.1561	14.0548	-1.36318	-5.96596	5e-05	0.000273369	yes	XLOC_000881	Sos
XLOC_000882	ND	D	OK	19.2072	26.3644	0.456944	1.95874	0.0007	0.00300059	yes	XLOC_000882	b
XLOC_000889	ND	D	OK	49.2924	72.34	0.553427	2.50212	5e-05	0.000273369	yes	XLOC_000889	Ance
XLOC_000892	ND	D	OK	2.93471	4.54903	0.63234	1.61731	0.00525	0.0173664	yes	XLOC_000892	Ance-3
XLOC_000895	ND	D	OK	6.7201	12.9827	0.950039	2.62373	5e-05	0.000273369	yes	XLOC_000895	nimB5
XLOC_000896	ND	D	OK	12.298	22.2845	0.857613	3.2238	5e-05	0.000273369	yes	XLOC_000896	Cyp28a5
XLOC_000897	ND	D	OK	1.22358	3.40406	1.47615	2.67803	5e-05	0.000273369	yes	XLOC_000897	nimC2
XLOC_000899	ND	D	OK	1.9688	3.66534	0.896629	2.04304	0.0008	0.00337364	yes	XLOC_000899	CG4500
XLOC_000904	ND	D	OK	3.87579	2.91806	-0.409483	-1.60628	0.00505	0.0168035	yes	XLOC_000904	wb
XLOC_000907	ND	D	OK	31.4946	22.0787	-0.51245	-2.30596	5e-05	0.000273369	yes	XLOC_000907	CG33090
XLOC_000911	ND	D	OK	20.7237	16.2489	-0.350941	-1.53957	0.0064	0.0206256	yes	XLOC_000911	spel1
XLOC_000912	ND	D	OK	8.79145	12.4392	0.500722	1.93964	0.00075	0.0031853	yes	XLOC_000912	noc
XLOC_000919	ND	D	OK	0.880269	3.60601	2.03439	1.81791	0.00935	0.0284853	yes	XLOC_000919	CG15282
XLOC_000923	ND	D	OK	1854.85	3130.29	0.754996	2.85442	5e-05	0.000273369	yes	XLOC_000923	CG34166
XLOC_000937	ND	D	OK	17.2061	9.88365	-0.799806	-3.29429	5e-05	0.000273369	yes	XLOC_000937	Su(H)
XLOC_000939	ND	D	OK	146.131	91.9491	-0.668354	-2.2998	0.00015	0.000751259	yes	XLOC_000939	vas
XLOC_000943	ND	D	OK	58.8172	33.1438	-0.827499	-3.67634	5e-05	0.000273369	yes	XLOC_000943	stc
XLOC_000950	ND	D	OK	0.962252	2.25138	1.22633	2.32559	0.00035	0.00161865	yes	XLOC_000950	esg
XLOC_000958	ND	D	OK	7.42181	22.782	1.61805	4.16758	5e-05	0.000273369	yes	XLOC_000958	CG7631
XLOC_000959	ND	D	OK	6.96311	10.4224	0.581889	2.01472	0.0005	0.00222999	yes	XLOC_000959	CG18480
XLOC_000964	ND	D	OK	22.7035	15.7634	-0.526336	-2.34812	5e-05	0.000273369	yes	XLOC_000964	l(2)35Df
XLOC_000978	ND	D	OK	401.394	216.943	-0.887702	-3.33849	5e-05	0.000273369	yes	XLOC_000978	BicC
XLOC_000982	ND	D	OK	9.06181	6.98915	-0.374683	-1.63692	0.00365	0.0128402	yes	XLOC_000982	Ca-alpha1D
XLOC_000986	ND	D	OK	10.7435	6.97388	-0.62343	-1.65434	0.00425	0.0145571	yes	XLOC_000986	CG4935
XLOC_000995	ND	D	OK	0	14.0945	Inf	NA	5e-05	0.000273369	yes	XLOC_000995	CG4440
XLOC_000999	ND	D	OK	79.7633	125.89	0.658368	2.45098	5e-05	0.000273369	yes	XLOC_000999	Idgf2
XLOC_001000	ND	D	OK	36.5828	74.4225	1.02457	4.52966	5e-05	0.000273369	yes	XLOC_001000	Idgf3
XLOC_001004	ND	D	OK	58.3155	27.8302	-1.06723	-4.32577	5e-05	0.000273369	yes	XLOC_001004	CG42389
XLOC_001021	ND	D	OK	6.07294	11.1022	0.870376	2.66955	5e-05	0.000273369	yes	XLOC_001021	yellow-b
XLOC_001022	ND	D	OK	153.717	112.366	-0.45207	-1.70502	0.0038	0.0132575	yes	XLOC_001022	Mhc
XLOC_001023	ND	D	OK	13.4977	24.5782	0.864666	3.50584	5e-05	0.000273369	yes	XLOC_001023	CG17928
XLOC_001026	ND	D	OK	23.9474	36.1776	0.595232	2.58894	5e-05	0.000273369	yes	XLOC_001026	Ugt36Bc
XLOC_001029	ND	D	OK	45.9377	28.0606	-0.711132	-3.1854	5e-05	0.000273369	yes	XLOC_001029	CG31739
XLOC_001030	ND	D	OK	41.8216	55.1937	0.400255	1.49291	0.00925	0.0282401	yes	XLOC_001030	pncr003:2L
XLOC_001031	ND	D	OK	43.9707	62.1215	0.498549	2.24572	0.0001	0.000521172	yes	XLOC_001031	CG31781
XLOC_001033	ND	D	OK	39.0798	17.264	-1.17866	-5.0251	5e-05	0.000273369	yes	XLOC_001033	CG42555
XLOC_001035	ND	D	OK	35.399	17.1868	-1.0424	-4.57201	5e-05	0.000273369	yes	XLOC_001035	CG15134
XLOC_001036	ND	D	OK	38.8399	21.6599	-0.842515	-3.65569	5e-05	0.000273369	yes	XLOC_001036	CG4841
XLOC_001055	ND	D	OK	2.02254	1.06512	-0.925157	-3.10445	5e-05	0.000273369	yes	XLOC_001055	Dhc36C
XLOC_001059	ND	D	OK	1.69163	2.82244	0.738528	1.47201	0.0138	0.0399086	yes	XLOC_001059	Sytalpha
XLOC_001060	ND	D	OK	17.0062	12.418	-0.453631	-1.82741	0.00165	0.00640425	yes	XLOC_001060	CG5674
XLOC_001067	ND	D	OK	232.769	312.563	0.425245	1.81225	0.00155	0.00606018	yes	XLOC_001067	Arr1
XLOC_001071	ND	D	OK	29.0792	42.0646	0.53262	1.80804	0.0028	0.010204	yes	XLOC_001071	CG15152
XLOC_001073	ND	D	OK	0.656912	2.087	1.66766	1.76104	0.0078	0.0243483	yes	XLOC_001073	CG17681
XLOC_001074	ND	D	OK	56.0253	159.281	1.50742	6.45013	5e-05	0.000273369	yes	XLOC_001074	CG15155
XLOC_001084	ND	D	OK	3.89286	6.08831	0.645211	1.66531	0.0055	0.0180872	yes	XLOC_001084	CG10176
XLOC_001085	ND	D	OK	20.2827	26.4152	0.381121	1.59713	0.00475	0.0159783	yes	XLOC_001085	CG10178
XLOC_001087	ND	D	OK	16.6718	10.7029	-0.6394	-2.78596	5e-05	0.000273369	yes	XLOC_001087	CG15160
XLOC_001089	ND	D	OK	17.7476	14.2645	-0.31519	-1.36501	0.0169	0.047348	yes	XLOC_001089	CG10333
XLOC_001090	ND	D	OK	27.326	36.2866	0.409163	1.77019	0.00205	0.00773766	yes	XLOC_001090	MESR3
XLOC_001099	ND	D	OK	129.781	169.733	0.387186	1.70579	0.00305	0.0109692	yes	XLOC_001099	CG17325
XLOC_001101	ND	D	OK	13.8731	20.6031	0.570574	2.23989	0.0002	0.000976131	yes	XLOC_001101	CG17323
XLOC_001103	ND	D	OK	36.5265	58.4624	0.678564	3.0447	5e-05	0.000273369	yes	XLOC_001103	ScpX
XLOC_001111	ND	D	OK	8.46275	6.46741	-0.387938	-1.5344	0.0076	0.023834	yes	XLOC_001111	CG31793
XLOC_001114	ND	D	OK	0.464488	1.04042	1.16345	1.68214	0.00815	0.0252929	yes	XLOC_001114	Side
XLOC_001115	ND	D	OK	31.3206	20.2595	-0.628512	-2.69076	5e-05	0.000273369	yes	XLOC_001115	mib2
XLOC_001120	ND	D	OK	67.4772	30.4844	-1.14633	-4.92891	5e-05	0.000273369	yes	XLOC_001120	CG10492
XLOC_001129	ND	D	OK	99.9887	38.2848	-1.38499	-5.81098	5e-05	0.000273369	yes	XLOC_001129	brat
XLOC_001141	ND	D	OK	17.9656	28.2019	0.650553	2.59453	5e-05	0.000273369	yes	XLOC_001141	Rab9
XLOC_001143	ND	D	OK	10.382	14.1724	0.449007	1.4554	0.01065	0.0318997	yes	XLOC_001143	CG10026
XLOC_001146	ND	D	OK	72.7958	92.3725	0.343608	1.40508	0.0139	0.0401292	yes	XLOC_001146	CG13083
XLOC_001148	ND	D	OK	64.7323	31.8174	-1.02467	-4.51388	5e-05	0.000273369	yes	XLOC_001148	swm
XLOC_001149	ND	D	OK	26.2036	11.8003	-1.15094	-5.06725	5e-05	0.000273369	yes	XLOC_001149	Top3alpha
XLOC_001152	ND	D	OK	51.7902	35.5708	-0.541986	-2.42943	5e-05	0.000273369	yes	XLOC_001152	CG31697,CG33116
XLOC_001158	ND	D	OK	1.40836	5.25649	1.90008	2.26659	0.00165	0.00640425	yes	XLOC_001158	CG13078
XLOC_001159	ND	D	OK	6.71371	10.4123	0.633106	1.6438	0.0047	0.0158363	yes	XLOC_001159	CG13077
XLOC_001160	ND	D	OK	51.5358	34.4333	-0.581771	-2.23881	0.0001	0.000521172	yes	XLOC_001160	msb1l
XLOC_001162	ND	D	OK	27.0144	12.4477	-1.11785	-4.91604	5e-05	0.000273369	yes	XLOC_001162	Lar
XLOC_001170	ND	D	OK	12.96	9.49554	-0.448741	-1.88661	0.0011	0.00447501	yes	XLOC_001170	sick
XLOC_001171	ND	D	OK	715.778	922.851	0.366586	1.53688	0.00705	0.0223931	yes	XLOC_001171	CG10664
XLOC_001173	ND	D	OK	154.042	263.158	0.772603	3.42226	5e-05	0.000273369	yes	XLOC_001173	CG10680
XLOC_001175	ND	D	OK	154.514	115.265	-0.422783	-1.72851	0.00275	0.0100398	yes	XLOC_001175	lok
XLOC_001177	ND	D	OK	10.506	4.73916	-1.14851	-1.71515	0.0074	0.0233658	yes	XLOC_001177	neb
XLOC_001180	ND	D	OK	5.75584	10.5068	0.868232	1.71315	0.0035	0.0123856	yes	XLOC_001180	Kua
XLOC_001186	ND	D	OK	55.5054	33.6352	-0.722656	-3.06909	5e-05	0.000273369	yes	XLOC_001186	spir
XLOC_001187	ND	D	OK	24.019	17.8722	-0.426456	-1.8422	0.0013	0.00518263	yes	XLOC_001187	rtGEF
XLOC_001189	ND	D	OK	190.714	152.739	-0.320341	-1.37512	0.01535	0.043718	yes	XLOC_001189	Arc-p34
XLOC_001208	ND	D	OK	30.0142	23.1962	-0.371758	-1.6687	0.00355	0.0125494	yes	XLOC_001208	CG31688
XLOC_001226	ND	D	OK	13.123	8.28558	-0.663418	-1.37027	0.01795	0.0499311	yes	XLOC_001226	CG2617
XLOC_001227	ND	D	OK	172.786	106.864	-0.693206	-2.86309	5e-05	0.000273369	yes	XLOC_001227	Fs(2)Ket
XLOC_001229	ND	D	OK	29.7501	19.7128	-0.593765	-2.6917	5e-05	0.000273369	yes	XLOC_001229	dia
XLOC_001230	ND	D	OK	68.5661	52.5857	-0.382824	-1.67932	0.0031	0.0111214	yes	XLOC_001230	cad
XLOC_001233	ND	D	OK	53.242	82.2724	0.627844	2.77919	5e-05	0.000273369	yes	XLOC_001233	CG9331
XLOC_001235	ND	D	OK	8.6401	12.6156	0.546094	1.42164	0.01495	0.0427107	yes	XLOC_001235	CG31674
XLOC_001236	ND	D	OK	19.6319	28.1459	0.519724	1.8358	0.0017	0.00657066	yes	XLOC_001236	CG31676
XLOC_001239	ND	D	OK	286.024	415.889	0.540064	2.42461	5e-05	0.000273369	yes	XLOC_001239	CG9336
XLOC_001240	ND	D	OK	37.1339	64.1072	0.78775	2.91907	5e-05	0.000273369	yes	XLOC_001240	CG9338
XLOC_001248	ND	D	OK	15.1233	8.52215	-0.827486	-2.63202	5e-05	0.000273369	yes	XLOC_001248	CG9259
XLOC_001250	ND	D	OK	38.9551	139.865	1.84416	3.69635	5e-05	0.000273369	yes	XLOC_001250	CG34136
XLOC_001257	ND	D	OK	50.0634	38.2172	-0.389534	-1.40231	0.01515	0.0431726	yes	XLOC_001257	CG9246
XLOC_001260	ND	D	OK	33.2855	19.6748	-0.758546	-3.30432	5e-05	0.000273369	yes	XLOC_001260	Mcm10
XLOC_001261	ND	D	OK	3.98762	5.36132	0.42706	1.41766	0.01345	0.0390077	yes	XLOC_001261	clumsy
XLOC_001262	ND	D	OK	67.2154	22.2866	-1.59262	-6.27554	5e-05	0.000273369	yes	XLOC_001262	CG8677
XLOC_001263	ND	D	OK	14.8318	9.58669	-0.629587	-2.57353	5e-05	0.000273369	yes	XLOC_001263	Hr39
XLOC_001265	ND	D	OK	47.0439	34.9148	-0.430172	-1.83806	0.0015	0.00588283	yes	XLOC_001265	CG8671
XLOC_001271	ND	D	OK	10.6862	16.9109	0.662203	2.80971	5e-05	0.000273369	yes	XLOC_001271	CG8665
XLOC_001276	ND	D	OK	4.123	1.42244	-1.53532	-2.19875	0.0011	0.00447501	yes	XLOC_001276	His1:CG33801
XLOC_001347	ND	D	OK	2.6692	3.9053	0.549025	1.47345	0.0128	0.0374438	yes	XLOC_001347	Ac3
XLOC_001362	ND	D	OK	41.1306	30.8204	-0.416326	-1.87641	0.0011	0.00447501	yes	XLOC_001362	CG3651
XLOC_001370	ND	D	OK	218.849	134.771	-0.699429	-2.82249	5e-05	0.000273369	yes	XLOC_001370	CG17018
XLOC_001373	ND	D	OK	65.9211	53.018	-0.314258	-1.41933	0.01685	0.047234	yes	XLOC_001373	CG17494
XLOC_001374	ND	D	OK	67.8199	52.3729	-0.37289	-1.65632	0.004	0.0138457	yes	XLOC_001374	CG17715
XLOC_001376	ND	D	OK	46.0554	36.6381	-0.330024	-1.5116	0.00985	0.0297672	yes	XLOC_001376	cta
XLOC_001377	ND	D	OK	97.7094	68.081	-0.521245	-2.21149	0.00015	0.000751259	yes	XLOC_001377	l(2)gl
XLOC_001383	ND	D	OK	28.0243	49.8751	0.831639	3.70687	5e-05	0.000273369	yes	XLOC_001383	CG4822
XLOC_001384	ND	D	OK	183.111	261.444	0.513785	2.09527	0.0001	0.000521172	yes	XLOC_001384	CG3164
XLOC_001385	ND	D	OK	3.53259	6.67798	0.918685	2.14231	0.00045	0.00203564	yes	XLOC_001385	CG31975
XLOC_001386	ND	D	OK	30.9883	60.8267	0.972982	4.29212	5e-05	0.000273369	yes	XLOC_001386	CG31974
XLOC_001391	ND	D	OK	197.352	91.356	-1.1112	-3.41144	5e-05	0.000273369	yes	XLOC_001391	kis
XLOC_001396	ND	D	OK	43.6859	29.7048	-0.556469	-1.4754	0.0102	0.0307516	yes	XLOC_001396	CG17078
XLOC_001398	ND	D	OK	49.6385	70.7723	0.511727	2.16964	0.0002	0.000976131	yes	XLOC_001398	CG3625
XLOC_001400	ND	D	OK	74.476	56.7032	-0.393346	-1.76372	0.002	0.00757148	yes	XLOC_001400	U2af38
XLOC_001402	ND	D	OK	182.455	367.54	1.01036	2.60261	5e-05	0.000273369	yes	XLOC_001402	CG11911
XLOC_001406	ND	D	OK	47.0509	66.7512	0.504572	2.27725	5e-05	0.000273369	yes	XLOC_001406	Ent1
XLOC_001408	ND	D	OK	58.3869	42.3724	-0.462519	-1.76443	0.0021	0.00789993	yes	XLOC_001408	alpha-Adaptin
XLOC_001412	ND	D	OK	6.56706	4.00585	-0.71314	-2.73047	5e-05	0.000273369	yes	XLOC_001412	CG4297
XLOC_001413	ND	D	OK	25.3248	33.272	0.393755	1.74279	0.0016	0.00623883	yes	XLOC_001413	cbt
XLOC_001425	ND	D	OK	12.4161	15.7103	0.339494	1.41457	0.0155	0.0440709	yes	XLOC_001425	Eaat2
XLOC_001437	ND	D	OK	48.6407	28.0067	-0.796391	-3.33191	5e-05	0.000273369	yes	XLOC_001437	ia2
XLOC_001439	ND	D	OK	44.4933	28.5159	-0.641824	-2.87864	5e-05	0.000273369	yes	XLOC_001439	S
XLOC_001441	ND	D	OK	17.6713	11.3941	-0.633117	-2.80735	5e-05	0.000273369	yes	XLOC_001441	CG4644
XLOC_001446	ND	D	OK	32.5457	63.2972	0.959676	4.37855	5e-05	0.000273369	yes	XLOC_001446	CG5080
XLOC_001456	ND	D	OK	90.5515	130.03	0.522036	2.33723	0.0001	0.000521172	yes	XLOC_001456	NLaz
XLOC_001461	ND	D	OK	0	4.10958	Inf	NA	5e-05	0.000273369	yes	XLOC_001461	halo
XLOC_001464	ND	D	OK	363.719	510.373	0.488727	2.0943	0.00035	0.00161865	yes	XLOC_001464	RFeSP
XLOC_001466	ND	D	OK	10.9861	7.01641	-0.646876	-2.08644	0.0004	0.00182656	yes	XLOC_001466	frtz
XLOC_001467	ND	D	OK	28.3402	36.5926	0.3687	1.62068	0.00445	0.0151297	yes	XLOC_001467	CG18317
XLOC_001486	ND	D	OK	31.3326	15.6893	-0.997887	-4.40446	5e-05	0.000273369	yes	XLOC_001486	CG15356
XLOC_001498	ND	D	OK	38.6888	21.7981	-0.827714	-3.6506	5e-05	0.000273369	yes	XLOC_001498	tho2
XLOC_001500	ND	D	OK	30.4605	19.9354	-0.611606	-2.71944	5e-05	0.000273369	yes	XLOC_001500	aop
XLOC_001502	ND	D	OK	191.615	322.848	0.752648	2.69303	5e-05	0.000273369	yes	XLOC_001502	CG34172
XLOC_001510	ND	D	OK	51.6031	33.4963	-0.623459	-2.76867	5e-05	0.000273369	yes	XLOC_001510	CG10882
XLOC_001514	ND	D	OK	6.00413	15.5648	1.37426	2.97682	5e-05	0.000273369	yes	XLOC_001514	CG17239
XLOC_001515	ND	D	OK	22.6409	51.9396	1.1979	4.31475	5e-05	0.000273369	yes	XLOC_001515	CG17012
XLOC_001518	ND	D	OK	52.1558	83.5927	0.680548	2.85273	5e-05	0.000273369	yes	XLOC_001518	CG31681
XLOC_001524	ND	D	OK	26.8695	34.8233	0.374083	1.5242	0.00835	0.0258031	yes	XLOC_001524	CG3597
XLOC_001536	ND	D	OK	8.40472	15.1163	0.846829	2.28826	0.00015	0.000751259	yes	XLOC_001536	Cyp309a1,Cyp309a2
XLOC_001537	ND	D	OK	14.7248	10.5697	-0.478319	-1.63232	0.00565	0.0185264	yes	XLOC_001537	CG34314
XLOC_001538	ND	D	OK	27.2492	18.5184	-0.557253	-2.32084	0.0001	0.000521172	yes	XLOC_001538	CG3227
XLOC_001539	ND	D	OK	183.888	240.24	0.385651	1.74785	0.00235	0.00873349	yes	XLOC_001539	CG3214
XLOC_001553	ND	D	OK	40.3323	22.018	-0.873253	-3.87326	5e-05	0.000273369	yes	XLOC_001553	Duox
XLOC_001559	ND	D	OK	3.47633	5.62129	0.693335	1.58042	0.0074	0.0233658	yes	XLOC_001559	CG3104
XLOC_001562	ND	D	OK	58.4336	79.1139	0.437132	1.82676	0.001	0.00411942	yes	XLOC_001562	NTPase
XLOC_001564	ND	D	OK	31.1953	22.9337	-0.443863	-2.0098	0.00065	0.00281122	yes	XLOC_001564	Rrp1
XLOC_001565	ND	D	OK	66.2061	37.7871	-0.809071	-3.20788	5e-05	0.000273369	yes	XLOC_001565	CG9641
XLOC_001567	ND	D	OK	107.322	38.5194	-1.47829	-5.93291	5e-05	0.000273369	yes	XLOC_001567	Chd1
XLOC_001568	ND	D	OK	14.2919	8.63915	-0.726238	-2.26843	0.00015	0.000751259	yes	XLOC_001568	okr
XLOC_001569	ND	D	OK	36.7679	65.4568	0.832097	3.60506	5e-05	0.000273369	yes	XLOC_001569	CG17224
XLOC_001571	ND	D	OK	33.657	24.9339	-0.432799	-1.94616	0.00095	0.00393422	yes	XLOC_001571	CG3605
XLOC_001575	ND	D	OK	60.2347	25.8738	-1.2191	-4.65967	5e-05	0.000273369	yes	XLOC_001575	toc
XLOC_001577	ND	D	OK	46.4575	33.5741	-0.468565	-2.11371	0.0004	0.00182656	yes	XLOC_001577	Mad
XLOC_001582	ND	D	OK	12.6047	17.5087	0.474113	1.91941	0.0008	0.00337364	yes	XLOC_001582	CG3332
XLOC_001585	ND	D	OK	8.65819	5.10434	-0.762339	-2.21621	0.00015	0.000751259	yes	XLOC_001585	CG3326
XLOC_001586	ND	D	OK	36.7433	17.2618	-1.0899	-4.80576	5e-05	0.000273369	yes	XLOC_001586	E23
XLOC_001587	ND	D	OK	36.9201	19.9367	-0.888976	-3.93351	5e-05	0.000273369	yes	XLOC_001587	CG34394
XLOC_001588	ND	D	OK	5.36907	8.08205	0.590048	1.77077	0.0031	0.0111214	yes	XLOC_001588	CG15412
XLOC_001594	ND	D	OK	22.8299	38.6419	0.759242	2.58748	5e-05	0.000273369	yes	XLOC_001594	CG3246
XLOC_001596	ND	D	OK	22.1416	16.0117	-0.467639	-1.99739	0.00025	0.00119769	yes	XLOC_001596	CG3238
XLOC_001600	ND	D	OK	71.1287	41.1284	-0.790299	-3.47079	5e-05	0.000273369	yes	XLOC_001600	CG33123
XLOC_001603	ND	D	OK	12.8615	8.91997	-0.527943	-1.87435	0.00125	0.00500493	yes	XLOC_001603	Spindly
XLOC_001604	ND	D	OK	0.466414	1.28338	1.46027	2.18054	0.0005	0.00222999	yes	XLOC_001604	sob
XLOC_001612	ND	D	OK	169.532	299.016	0.818668	3.14135	5e-05	0.000273369	yes	XLOC_001612	CG16704
XLOC_001615	ND	D	OK	454.998	766.994	0.753356	3.31694	5e-05	0.000273369	yes	XLOC_001615	CG16713
XLOC_001616	ND	D	OK	1404.94	2393.65	0.768709	3.32214	5e-05	0.000273369	yes	XLOC_001616	CG16712
XLOC_001618	ND	D	OK	56.4958	99.3706	0.814675	3.05662	5e-05	0.000273369	yes	XLOC_001618	CG10031
XLOC_001619	ND	D	OK	24.2928	43.5742	0.842944	3.19438	5e-05	0.000273369	yes	XLOC_001619	CG31778
XLOC_001620	ND	D	OK	55.5988	85.3967	0.619127	1.87193	0.00105	0.00429572	yes	XLOC_001620	CG31777
XLOC_001621	ND	D	OK	14.2292	8.93383	-0.671502	-2.76397	5e-05	0.000273369	yes	XLOC_001621	cutlet
XLOC_001622	ND	D	OK	12.2189	18.7068	0.61445	1.57012	0.0087	0.0267623	yes	XLOC_001622	CG31955
XLOC_001623	ND	D	OK	1.22163	6.90923	2.49971	3.69408	5e-05	0.000273369	yes	XLOC_001623	lectin-24A
XLOC_001625	ND	D	OK	44.0919	30.6171	-0.526174	-1.90839	0.0011	0.00447501	yes	XLOC_001625	CG31957
XLOC_001626	ND	D	OK	29.4636	17.9499	-0.714956	-3.16253	5e-05	0.000273369	yes	XLOC_001626	capu
XLOC_001639	ND	D	OK	2.79158	1.77546	-0.652893	-1.64	0.0051	0.0169365	yes	XLOC_001639	CG15431
XLOC_001644	ND	D	OK	17.4424	10.5238	-0.728942	-3.08688	5e-05	0.000273369	yes	XLOC_001644	CG15439
XLOC_001652	ND	D	OK	7.30485	4.60783	-0.664767	-2.61276	5e-05	0.000273369	yes	XLOC_001652	dp
XLOC_001659	ND	D	OK	24.1968	32.7924	0.438549	1.78349	0.0021	0.00789993	yes	XLOC_001659	CG3244
XLOC_001665	ND	D	OK	47.1968	27.006	-0.805409	-2.79929	5e-05	0.000273369	yes	XLOC_001665	Cf2
XLOC_001671	ND	D	OK	453.368	966.069	1.09144	4.51663	5e-05	0.000273369	yes	XLOC_001671	Jon25Biii
XLOC_001672	ND	D	OK	50.1755	169.705	1.75797	7.53109	5e-05	0.000273369	yes	XLOC_001672	Jon25Bii
XLOC_001673	ND	D	OK	35.535	98.4724	1.47048	6.13903	5e-05	0.000273369	yes	XLOC_001673	Jon25Bi
XLOC_001679	ND	D	OK	29.1487	22.0856	-0.400321	-1.69498	0.0029	0.0105192	yes	XLOC_001679	CG8892
XLOC_001682	ND	D	OK	68.0968	51.8301	-0.393797	-1.62269	0.00505	0.0168035	yes	XLOC_001682	vkg
XLOC_001686	ND	D	OK	315.964	246.644	-0.357329	-1.55721	0.00695	0.0221378	yes	XLOC_001686	CG14036
XLOC_001695	ND	D	OK	38.5708	20.721	-0.896417	-3.94339	5e-05	0.000273369	yes	XLOC_001695	Bsg25D
XLOC_001696	ND	D	OK	0.511561	1.31838	1.36578	1.75158	0.0041	0.0141532	yes	XLOC_001696	CG14024
XLOC_001697	ND	D	OK	74.3514	26.3136	-1.49855	-5.86746	5e-05	0.000273369	yes	XLOC_001697	CG14023
XLOC_001699	ND	D	OK	13.6553	18.6666	0.450996	1.84218	0.00095	0.00393422	yes	XLOC_001699	fusl
XLOC_001700	ND	D	OK	18.4805	27.5546	0.576288	2.41888	5e-05	0.000273369	yes	XLOC_001700	CG12512
XLOC_001709	ND	D	OK	0	1.02012	Inf	NA	5e-05	0.000273369	yes	XLOC_001709	CG14014
XLOC_001717	ND	D	OK	6.60901	10.0299	0.601798	1.95108	0.0009	0.00375012	yes	XLOC_001717	CG11149
XLOC_001719	ND	D	OK	26.2846	35.0494	0.415172	1.39229	0.01705	0.0477024	yes	XLOC_001719	CG11147
XLOC_001721	ND	D	OK	20.7839	16.1282	-0.36588	-1.59116	0.00565	0.0185264	yes	XLOC_001721	CG9171
XLOC_001722	ND	D	OK	38.4331	29.1954	-0.39661	-1.66087	0.00375	0.0131147	yes	XLOC_001722	CG14005
XLOC_001724	ND	D	OK	3.6711	5.6661	0.626144	1.79498	0.0021	0.00789993	yes	XLOC_001724	CG8965
XLOC_001733	ND	D	OK	17.0045	35.0253	1.04248	2.78451	5e-05	0.000273369	yes	XLOC_001733	Vm26Ac
XLOC_001734	ND	D	OK	1296.87	2465.44	0.926812	3.73472	5e-05	0.000273369	yes	XLOC_001734	Vm26Aa
XLOC_001735	ND	D	OK	27.5872	53.2261	0.948134	3.98055	5e-05	0.000273369	yes	XLOC_001735	psd
XLOC_001736	ND	D	OK	6.29554	9.20576	0.548208	1.83271	0.00205	0.00773766	yes	XLOC_001736	CG13992
XLOC_001738	ND	D	OK	140.605	50.0737	-1.48953	-5.8195	5e-05	0.000273369	yes	XLOC_001738	lid
XLOC_001739	ND	D	OK	17.8278	24.2773	0.445483	1.78309	0.00265	0.0097237	yes	XLOC_001739	Gal
XLOC_001740	ND	D	OK	3.15589	4.42015	0.486049	1.46383	0.0107	0.0320116	yes	XLOC_001740	CG9098
XLOC_001748	ND	D	OK	248.041	359.301	0.534613	2.21928	0.0002	0.000976131	yes	XLOC_001748	CG9140
XLOC_001757	ND	D	OK	31.0542	16.2254	-0.936529	-4.19752	5e-05	0.000273369	yes	XLOC_001757	Pez
XLOC_001759	ND	D	OK	26.7619	55.6802	1.05698	4.55711	5e-05	0.000273369	yes	XLOC_001759	CG9498
XLOC_001766	ND	D	OK	45.5719	74.0957	0.701245	3.13921	5e-05	0.000273369	yes	XLOC_001766	CG9527
XLOC_001767	ND	D	OK	28.1728	36.6593	0.379874	1.71242	0.00185	0.00708026	yes	XLOC_001767	retm
XLOC_001783	ND	D	OK	54.1132	21.7395	-1.31566	-5.5221	5e-05	0.000273369	yes	XLOC_001783	CG31635
XLOC_001790	ND	D	OK	24.3403	15.9904	-0.606143	-1.9437	0.00055	0.00242421	yes	XLOC_001790	CG11329
XLOC_001792	ND	D	OK	6.31347	10.1019	0.678122	2.28322	0.00015	0.000751259	yes	XLOC_001792	CG11327,Tsp
XLOC_001793	ND	D	OK	35.3604	55.3947	0.647611	2.85482	5e-05	0.000273369	yes	XLOC_001793	GRHR
XLOC_001800	ND	D	OK	22.3797	34.6904	0.632344	2.76111	5e-05	0.000273369	yes	XLOC_001800	nrv2
XLOC_001810	ND	D	OK	3.89742	2.82243	-0.465582	-1.74979	0.0031	0.0111214	yes	XLOC_001810	CG18304
XLOC_001812	ND	D	OK	13.13	6.87019	-0.934445	-3.67349	5e-05	0.000273369	yes	XLOC_001812	iHog
XLOC_001816	ND	D	OK	33.1651	22.5265	-0.55804	-2.19723	0.00015	0.000751259	yes	XLOC_001816	sip2
XLOC_001821	ND	D	OK	44.3301	35.561	-0.317992	-1.43787	0.0137	0.0396534	yes	XLOC_001821	CG31908
XLOC_001825	ND	D	OK	0.652437	1.54206	1.24095	1.96091	0.0028	0.010204	yes	XLOC_001825	Pvf2
XLOC_001830	ND	D	OK	100.483	76.2347	-0.398426	-1.50598	0.00925	0.0282401	yes	XLOC_001830	CG13784
XLOC_001838	ND	D	OK	125.812	267.867	1.09024	4.81643	5e-05	0.000273369	yes	XLOC_001838	CG5958
XLOC_001839	ND	D	OK	11.8687	19.4847	0.715182	2.79296	5e-05	0.000273369	yes	XLOC_001839	santa-maria
XLOC_001842	ND	D	OK	16.3912	9.0661	-0.854364	-3.80119	5e-05	0.000273369	yes	XLOC_001842	CG42533
XLOC_001844	ND	D	OK	18.0001	12.3594	-0.54239	-2.37424	5e-05	0.000273369	yes	XLOC_001844	Rapgap1
XLOC_001854	ND	D	OK	9.44003	15.4257	0.708475	2.44003	5e-05	0.000273369	yes	XLOC_001854	CG13795
XLOC_001855	ND	D	OK	5.07488	10.2377	1.01245	3.29918	5e-05	0.000273369	yes	XLOC_001855	CG13796
XLOC_001861	ND	D	OK	9.89432	13.6322	0.462345	1.74144	0.003	0.0108201	yes	XLOC_001861	CG7149
XLOC_001862	ND	D	OK	5.06026	9.36286	0.887737	3.17725	5e-05	0.000273369	yes	XLOC_001862	LKR
XLOC_001864	ND	D	OK	18.6013	14.0996	-0.399746	-1.74521	0.0021	0.00789993	yes	XLOC_001864	cdc14
XLOC_001867	ND	D	OK	0.760732	1.60608	1.07808	1.44787	0.01645	0.0463176	yes	XLOC_001867	TwdlE
XLOC_001874	ND	D	OK	17.4035	10.3892	-0.744301	-2.26355	0.00085	0.00356227	yes	XLOC_001874	Snoo
XLOC_001877	ND	D	OK	3.51518	7.93201	1.17409	3.46524	5e-05	0.000273369	yes	XLOC_001877	CG7227
XLOC_001879	ND	D	OK	7.85712	13.6559	0.797454	2.80386	5e-05	0.000273369	yes	XLOC_001879	Spn28D
XLOC_001885	ND	D	OK	98.4262	53.9932	-0.866266	-2.97057	5e-05	0.000273369	yes	XLOC_001885	poe
XLOC_001886	ND	D	OK	20.2703	14.8997	-0.444085	-1.48278	0.0108	0.0322917	yes	XLOC_001886	MED20
XLOC_001887	ND	D	OK	57.2631	27.5638	-1.05483	-4.57794	5e-05	0.000273369	yes	XLOC_001887	Mcr
XLOC_001888	ND	D	OK	29.1388	17.9973	-0.695158	-3.11193	5e-05	0.000273369	yes	XLOC_001888	CG8683
XLOC_001890	ND	D	OK	48.7946	24.5409	-0.991532	-3.84895	5e-05	0.000273369	yes	XLOC_001890	CG8552
XLOC_001903	ND	D	OK	61.6424	36.3141	-0.763394	-3.39393	5e-05	0.000273369	yes	XLOC_001903	Btk29A
XLOC_001908	ND	D	OK	14.7441	21.8206	0.565554	1.4982	0.01285	0.0375359	yes	XLOC_001908	CG7781
XLOC_001909	ND	D	OK	117.596	85.6468	-0.457368	-1.91456	0.0007	0.00300059	yes	XLOC_001909	CG7627
XLOC_001918	ND	D	OK	13.0162	37.6828	1.5336	2.53179	0.00025	0.00119769	yes	XLOC_001918	Peritrophin-15b
XLOC_001919	ND	D	OK	161.69	316.741	0.97007	3.87508	5e-05	0.000273369	yes	XLOC_001919	Peritrophin-15a
XLOC_001921	ND	D	OK	44.6787	35.7238	-0.322701	-1.45656	0.01055	0.0316469	yes	XLOC_001921	CG13397
XLOC_001924	ND	D	OK	16.6152	9.95153	-0.739515	-3.07162	5e-05	0.000273369	yes	XLOC_001924	D12
XLOC_001926	ND	D	OK	49.0311	61.3233	0.322737	1.44368	0.01205	0.0355575	yes	XLOC_001926	fu12
XLOC_001929	ND	D	OK	690.307	1206.41	0.805412	3.13378	5e-05	0.000273369	yes	XLOC_001929	Bace
XLOC_001933	ND	D	OK	32.2039	20.9715	-0.618805	-2.75832	5e-05	0.000273369	yes	XLOC_001933	CG34441
XLOC_001941	ND	D	OK	2.42728	6.55165	1.43252	4.01117	5e-05	0.000273369	yes	XLOC_001941	CG9463
XLOC_001942	ND	D	OK	0.222404	0.883873	1.99066	2.39045	0.0006	0.00262067	yes	XLOC_001942	CG9465
XLOC_001943	ND	D	OK	13.7726	37.1602	1.43195	5.99041	5e-05	0.000273369	yes	XLOC_001943	CG9466
XLOC_001944	ND	D	OK	21.0774	44.612	1.08173	4.71021	5e-05	0.000273369	yes	XLOC_001944	CG9468
XLOC_001947	ND	D	OK	14.2349	18.2928	0.361848	1.52575	0.0075	0.0236007	yes	XLOC_001947	CG31886
XLOC_001961	ND	D	OK	0.772955	0.343678	-1.16933	-1.62198	0.0109	0.0325524	yes	XLOC_001961	CG34366
XLOC_001971	ND	D	OK	60.5723	40.4179	-0.583666	-2.63232	5e-05	0.000273369	yes	XLOC_001971	Pka-C1
XLOC_001975	ND	D	OK	29.6469	85.0073	1.51971	6.63435	5e-05	0.000273369	yes	XLOC_001975	Cyp4e3
XLOC_001981	ND	D	OK	68.5519	88.5611	0.369476	1.56172	0.0071	0.0225378	yes	XLOC_001981	CR18854
XLOC_001983	ND	D	OK	2.30012	1.21917	-0.915807	-2.00132	0.00085	0.00356227	yes	XLOC_001983	nAcRalpha-30D
XLOC_001986	ND	D	OK	199.287	275.323	0.466279	1.97804	0.00035	0.00161865	yes	XLOC_001986	Uhg2
XLOC_001993	ND	D	OK	39.3047	57.0097	0.536507	2.37416	5e-05	0.000273369	yes	XLOC_001993	CG13124
XLOC_001994	ND	D	OK	42.3653	30.4059	-0.478534	-2.15634	0.00025	0.00119769	yes	XLOC_001994	CG5899
XLOC_001999	ND	D	OK	37.8	69.3344	0.875186	3.44802	5e-05	0.000273369	yes	XLOC_001999	CG5853
XLOC_002007	ND	D	OK	14.8719	8.8491	-0.74899	-3.23378	5e-05	0.000273369	yes	XLOC_002007	CG31755
XLOC_002016	ND	D	OK	61.8136	37.5667	-0.71847	-3.07723	5e-05	0.000273369	yes	XLOC_002016	Ripalpha
XLOC_002024	ND	D	OK	3.58426	6.06137	0.757969	2.18449	0.00025	0.00119769	yes	XLOC_002024	CG31720
XLOC_002026	ND	D	OK	28.0337	35.8371	0.354295	1.48806	0.00995	0.0300604	yes	XLOC_002026	bsk
XLOC_002028	ND	D	OK	21.5349	26.9304	0.322562	1.4384	0.01575	0.044669	yes	XLOC_002028	Pten
XLOC_002031	ND	D	OK	29.4792	20.6222	-0.515496	-2.27254	0.0001	0.000521172	yes	XLOC_002031	Utx
XLOC_002032	ND	D	OK	9.5889	19.3004	1.00919	3.24691	5e-05	0.000273369	yes	XLOC_002032	CG34043
XLOC_002033	ND	D	OK	168.821	69.6777	-1.27672	-4.82273	5e-05	0.000273369	yes	XLOC_002033	CG5604
XLOC_002035	ND	D	OK	17.0653	22.363	0.390048	1.5675	0.00675	0.0216026	yes	XLOC_002035	CYLD
XLOC_002038	ND	D	OK	37.586	59.6721	0.666861	2.93937	5e-05	0.000273369	yes	XLOC_002038	CG5390
XLOC_002039	ND	D	OK	3.60485	5.25506	0.543771	1.44449	0.01385	0.0400304	yes	XLOC_002039	Cdk5alpha
XLOC_002042	ND	D	OK	24.7433	38.9159	0.653323	1.65871	0.00415	0.0142821	yes	XLOC_002042	CG5381
XLOC_002043	ND	D	OK	107.048	82.8104	-0.370377	-1.61044	0.00625	0.0202129	yes	XLOC_002043	RnrL
XLOC_002047	ND	D	OK	28.4817	22.0814	-0.367205	-1.66044	0.0038	0.0132575	yes	XLOC_002047	CG5366
XLOC_002050	ND	D	OK	143.849	99.3312	-0.534241	-2.41464	5e-05	0.000273369	yes	XLOC_002050	cdc2
XLOC_002054	ND	D	OK	19.3672	11.9318	-0.698796	-2.72955	5e-05	0.000273369	yes	XLOC_002054	pie
XLOC_002059	ND	D	OK	4.49791	8.20802	0.867781	2.94104	5e-05	0.000273369	yes	XLOC_002059	CG5322
XLOC_002065	ND	D	OK	32.4984	45.4608	0.484256	2.18315	0.0001	0.000521172	yes	XLOC_002065	Fatp
XLOC_002069	ND	D	OK	4.86666	2.08911	-1.22004	-1.8236	0.00315	0.0112808	yes	XLOC_002069	CG7299
XLOC_002070	ND	D	OK	12.057	22.3036	0.887399	2.10626	0.0007	0.00300059	yes	XLOC_002070	CG7296
XLOC_002080	ND	D	OK	60.6773	99.9368	0.719858	3.02422	5e-05	0.000273369	yes	XLOC_002080	CG17124
XLOC_002081	ND	D	OK	66.9888	53.7719	-0.317068	-1.42576	0.01235	0.0363054	yes	XLOC_002081	UbcD2
XLOC_002083	ND	D	OK	7.63364	11.853	0.63481	2.61427	5e-05	0.000273369	yes	XLOC_002083	CG31869
XLOC_002090	ND	D	OK	24.8192	17.177	-0.530983	-1.93848	0.0008	0.00337364	yes	XLOC_002090	ial
XLOC_002103	ND	D	OK	14.1336	9.03821	-0.645024	-2.70239	5e-05	0.000273369	yes	XLOC_002103	Samuel
XLOC_002104	ND	D	OK	9.62084	13.852	0.525865	1.59791	0.0064	0.0206256	yes	XLOC_002104	Ast-C
XLOC_002106	ND	D	OK	56.4018	29.1829	-0.950616	-4.18052	5e-05	0.000273369	yes	XLOC_002106	Ge-1
XLOC_002107	ND	D	OK	34.8381	21.7876	-0.677158	-3.04415	5e-05	0.000273369	yes	XLOC_002107	Reps
XLOC_002109	ND	D	OK	36.5967	26.5977	-0.460411	-2.07426	0.00025	0.00119769	yes	XLOC_002109	CG6230
XLOC_002117	ND	D	OK	215.047	482.863	1.16696	4.98933	5e-05	0.000273369	yes	XLOC_002117	Vm32E
XLOC_002118	ND	D	OK	32.1669	11.9103	-1.43337	-6.01879	5e-05	0.000273369	yes	XLOC_002118	cmet
XLOC_002123	ND	D	OK	66.3132	30.4466	-1.12301	-4.657	5e-05	0.000273369	yes	XLOC_002123	CG6509
XLOC_002125	ND	D	OK	113.956	172.938	0.601776	2.59141	5e-05	0.000273369	yes	XLOC_002125	CG31705
XLOC_002126	ND	D	OK	5.649	8.56235	0.600011	1.58341	0.0076	0.023834	yes	XLOC_002126	CG31706
XLOC_002136	ND	D	OK	75.0338	42.7982	-0.80999	-3.33915	5e-05	0.000273369	yes	XLOC_002136	crol
XLOC_002138	ND	D	OK	42.3546	31.6093	-0.422169	-1.90114	0.0009	0.00375012	yes	XLOC_002138	CG14939
XLOC_002142	ND	D	OK	1.19334	0.507176	-1.23445	-1.9705	0.00115	0.00464858	yes	XLOC_002142	bft
XLOC_002143	ND	D	OK	33.215	25.1573	-0.400857	-1.80294	0.0019	0.00724974	yes	XLOC_002143	CG6686
XLOC_002147	ND	D	OK	109.855	149.574	0.445256	1.38538	0.015	0.0428173	yes	XLOC_002147	CG6746
XLOC_002148	ND	D	OK	11.9121	4.99992	-1.25245	-5.24329	5e-05	0.000273369	yes	XLOC_002148	CG6734
XLOC_002163	ND	D	OK	103.587	138.053	0.414373	1.8534	0.001	0.00411942	yes	XLOC_002163	CG6579
XLOC_002164	ND	D	OK	369.01	706.469	0.936969	3.74519	5e-05	0.000273369	yes	XLOC_002164	vir-1
XLOC_002171	ND	D	OK	164.26	116.297	-0.498168	-1.626	0.00445	0.0151297	yes	XLOC_002171	bun
XLOC_002179	ND	D	OK	18.8713	14.8284	-0.347827	-1.48697	0.0092	0.0281213	yes	XLOC_002179	CG5776
XLOC_002181	ND	D	OK	72.6308	35.2378	-1.04346	-4.57154	5e-05	0.000273369	yes	XLOC_002181	CG5787
XLOC_002184	ND	D	OK	5.03333	2.68776	-0.905108	-2.88678	5e-05	0.000273369	yes	XLOC_002184	kek1
XLOC_002186	ND	D	OK	13.8519	18.223	0.395671	1.68645	0.00395	0.0136914	yes	XLOC_002186	Vha68-1
XLOC_002187	ND	D	OK	32.9751	21.2936	-0.630961	-2.82559	5e-05	0.000273369	yes	XLOC_002187	CG9934
XLOC_002189	ND	D	OK	53.6591	33.8849	-0.663179	-2.71816	5e-05	0.000273369	yes	XLOC_002189	CG9932
XLOC_002191	ND	D	OK	482.386	669.056	0.471938	2.10796	0.0001	0.000521172	yes	XLOC_002191	CG9928
XLOC_002192	ND	D	OK	26.4607	52.7738	0.99597	2.98345	5e-05	0.000273369	yes	XLOC_002192	CG16978
XLOC_002194	ND	D	OK	51.7376	24.9096	-1.05451	-4.63986	5e-05	0.000273369	yes	XLOC_002194	Sfmbt
XLOC_002196	ND	D	OK	62.2323	45.4612	-0.453028	-1.98688	0.0005	0.00222999	yes	XLOC_002196	CG16974
XLOC_002197	ND	D	OK	29.5746	9.71648	-1.60585	-4.02606	5e-05	0.000273369	yes	XLOC_002197	CG16972
XLOC_002201	ND	D	OK	32.592	21.5523	-0.596675	-2.67626	5e-05	0.000273369	yes	XLOC_002201	CG9426
XLOC_002210	ND	D	OK	2.07631	1.27777	-0.700389	-1.45726	0.0126	0.0369547	yes	XLOC_002210	CG16970
XLOC_002221	ND	D	OK	1655.85	3000.14	0.857458	3.51693	5e-05	0.000273369	yes	XLOC_002221	Vm34Ca
XLOC_002222	ND	D	OK	3.95999	9.23648	1.22184	2.06721	0.0015	0.00588283	yes	XLOC_002222	CG16956
XLOC_002223	ND	D	OK	24.2482	31.4358	0.374532	1.50576	0.0094	0.0285947	yes	XLOC_002223	CG9267
XLOC_002225	ND	D	OK	44.7975	26.1516	-0.776518	-3.3942	5e-05	0.000273369	yes	XLOC_002225	B4
XLOC_002234	ND	D	OK	24.0027	36.6384	0.610159	2.34041	5e-05	0.000273369	yes	XLOC_002234	adat
XLOC_002236	ND	D	OK	13.1418	8.52588	-0.62424	-2.57356	5e-05	0.000273369	yes	XLOC_002236	tam
XLOC_002247	ND	D	OK	44.087	85.2068	0.950615	4.17095	5e-05	0.000273369	yes	XLOC_002247	nimB2
XLOC_002249	ND	D	OK	3.34249	5.16613	0.628158	1.43926	0.013	0.037865	yes	XLOC_002249	nimB4
XLOC_002251	ND	D	OK	4.9288	9.63222	0.966631	3.00341	5e-05	0.000273369	yes	XLOC_002251	nimC1
XLOC_002255	ND	D	OK	7.04597	10.5006	0.575594	1.73549	0.00345	0.0122385	yes	XLOC_002255	CG18095
XLOC_002257	ND	D	OK	217.556	325.431	0.580961	2.47491	5e-05	0.000273369	yes	XLOC_002257	CG15293
XLOC_002258	ND	D	OK	34.5022	73.1453	1.08408	4.64041	5e-05	0.000273369	yes	XLOC_002258	CG31769
XLOC_002259	ND	D	OK	2.30057	3.59939	0.645763	1.978	0.00075	0.0031853	yes	XLOC_002259	CG32972
XLOC_002263	ND	D	OK	42.9155	59.2931	0.466366	1.72916	0.0026	0.00956445	yes	XLOC_002263	l(2)34Fc
XLOC_002287	ND	D	OK	13.843	24.2319	0.807744	3.20759	5e-05	0.000273369	yes	XLOC_002287	CG15279
XLOC_002293	ND	D	OK	53.3165	32.9805	-0.692972	-3.0838	5e-05	0.000273369	yes	XLOC_002293	mol
XLOC_002298	ND	D	OK	30.2703	13.0656	-1.21213	-5.38415	5e-05	0.000273369	yes	XLOC_002298	ck
XLOC_002305	ND	D	OK	10.9806	8.07483	-0.443447	-1.72569	0.0025	0.00922335	yes	XLOC_002305	CG3975
XLOC_002306	ND	D	OK	8.87035	13.6833	0.625353	1.98694	0.0005	0.00222999	yes	XLOC_002306	yuri
XLOC_002308	ND	D	OK	179.864	242.448	0.430768	1.92683	0.00095	0.00393422	yes	XLOC_002308	UK114
XLOC_002316	ND	D	OK	57.0167	112.583	0.981532	4.3358	5e-05	0.000273369	yes	XLOC_002316	CG15255
XLOC_002318	ND	D	OK	0.729439	2.77427	1.92725	2.27504	0.0022	0.00823336	yes	XLOC_002318	CG15254
XLOC_002322	ND	D	OK	86.0595	38.7305	-1.15186	-5.01276	5e-05	0.000273369	yes	XLOC_002322	CycE
XLOC_002325	ND	D	OK	9.92432	13.6972	0.464836	1.99105	0.00035	0.00161865	yes	XLOC_002325	Gli
XLOC_002333	ND	D	OK	5.01021	8.65598	0.788826	2.10535	0.0004	0.00182656	yes	XLOC_002333	CG31821
XLOC_002339	ND	D	OK	40.8269	28.7785	-0.504526	-1.66426	0.00435	0.0148444	yes	XLOC_002339	twe
XLOC_002340	ND	D	OK	49.1388	29.9542	-0.714106	-3.1946	5e-05	0.000273369	yes	XLOC_002340	crp
XLOC_002342	ND	D	OK	23.6882	17.8396	-0.409083	-1.81145	0.00165	0.00640425	yes	XLOC_002342	heix
XLOC_002346	ND	D	OK	127.906	93.5882	-0.450684	-1.64726	0.0051	0.0169365	yes	XLOC_002346	cact
XLOC_002350	ND	D	OK	84.9382	39.6054	-1.10072	-2.9305	5e-05	0.000273369	yes	XLOC_002350	CG42231,chif
XLOC_002354	ND	D	OK	1.55951	1.0418	-0.582017	-1.40343	0.01245	0.036557	yes	XLOC_002354	dac
XLOC_002355	ND	D	OK	27.2813	17.869	-0.610452	-2.68034	5e-05	0.000273369	yes	XLOC_002355	CG5953
XLOC_002365	ND	D	OK	44.0765	17.3251	-1.34715	-4.90502	5e-05	0.000273369	yes	XLOC_002365	glu
XLOC_002368	ND	D	OK	243.789	415.39	0.768831	3.19239	5e-05	0.000273369	yes	XLOC_002368	Cyt-b5-r
XLOC_002369	ND	D	OK	117.162	87.447	-0.422018	-1.60071	0.0063	0.0203421	yes	XLOC_002369	CG13280,Cas
XLOC_002372	ND	D	OK	41.8642	71.5507	0.773249	3.37348	5e-05	0.000273369	yes	XLOC_002372	CG13284
XLOC_002373	ND	D	OK	6.42801	10.2377	0.671443	1.74371	0.0032	0.0114397	yes	XLOC_002373	CG31810
XLOC_002377	ND	D	OK	183.602	307.722	0.745047	3.34787	5e-05	0.000273369	yes	XLOC_002377	CG6115
XLOC_002384	ND	D	OK	1.72249	2.94018	0.771414	1.54587	0.0089	0.0272948	yes	XLOC_002384	beat-IIIc
XLOC_002387	ND	D	OK	20.0075	13.2802	-0.591257	-2.58268	5e-05	0.000273369	yes	XLOC_002387	CG6860
XLOC_002394	ND	D	OK	61.4623	43.3709	-0.502975	-2.19529	0.00015	0.000751259	yes	XLOC_002394	BicD
XLOC_002398	ND	D	OK	28.2451	19.1948	-0.557284	-2.50485	5e-05	0.000273369	yes	XLOC_002398	qua
XLOC_002405	ND	D	OK	35.0463	58.6237	0.742223	2.94035	5e-05	0.000273369	yes	XLOC_002405	CG6870
XLOC_002407	ND	D	OK	6.0034	3.9385	-0.608136	-2.59284	5e-05	0.000273369	yes	XLOC_002407	CadN
XLOC_002413	ND	D	OK	22.2971	11.6589	-0.935427	-3.19888	5e-05	0.000273369	yes	XLOC_002413	kel
XLOC_002414	ND	D	OK	5.95457	11.1485	0.904784	3.54752	5e-05	0.000273369	yes	XLOC_002414	Socs36E
XLOC_002424	ND	D	OK	45.5391	23.1201	-0.977958	-4.3164	5e-05	0.000273369	yes	XLOC_002424	ncm
XLOC_002425	ND	D	OK	43.4882	32.3762	-0.425689	-1.89241	0.00055	0.00242421	yes	XLOC_002425	bsf
XLOC_002426	ND	D	OK	7.90303	11.0281	0.480712	1.91463	0.00105	0.00429572	yes	XLOC_002426	CG10283
XLOC_002428	ND	D	OK	45.0465	23.2713	-0.952863	-4.19395	5e-05	0.000273369	yes	XLOC_002428	Pde11
XLOC_002438	ND	D	OK	43.8728	27.9403	-0.650982	-2.20714	0.0004	0.00182656	yes	XLOC_002438	tos
XLOC_002439	ND	D	OK	53.7625	26.1506	-1.03976	-4.5578	5e-05	0.000273369	yes	XLOC_002439	msl-1
XLOC_002444	ND	D	OK	15.9056	24.2331	0.607444	1.6424	0.0057	0.0186723	yes	XLOC_002444	Irk3
XLOC_002447	ND	D	OK	517.058	698.746	0.43444	1.8067	0.00255	0.00939757	yes	XLOC_002447	CG10570
XLOC_002448	ND	D	OK	26.7574	39.8865	0.575965	1.65473	0.0042	0.0144199	yes	XLOC_002448	CG17597
XLOC_002449	ND	D	OK	51.1128	20.3829	-1.32632	-5.79955	5e-05	0.000273369	yes	XLOC_002449	CG10600
XLOC_002451	ND	D	OK	12.1021	18.3429	0.599964	2.38267	5e-05	0.000273369	yes	XLOC_002451	CG33120
XLOC_002453	ND	D	OK	0.961505	1.57438	0.711422	1.4463	0.014	0.0403146	yes	XLOC_002453	tup
XLOC_002454	ND	D	OK	24.4004	9.34067	-1.3853	-6.07822	5e-05	0.000273369	yes	XLOC_002454	ssp3
XLOC_002456	ND	D	OK	57.3731	105.775	0.88255	3.90804	5e-05	0.000273369	yes	XLOC_002456	CG10621
XLOC_002457	ND	D	OK	38.0021	50.5769	0.412398	1.83668	0.00125	0.00500493	yes	XLOC_002457	CG10623
XLOC_002458	ND	D	OK	56.5279	28.7864	-0.973577	-3.86046	5e-05	0.000273369	yes	XLOC_002458	Nak
XLOC_002462	ND	D	OK	42.9129	73.5134	0.776596	3.45473	5e-05	0.000273369	yes	XLOC_002462	CG10650
XLOC_002474	ND	D	OK	14.2054	20.8959	0.556779	1.76272	0.0025	0.00922335	yes	XLOC_002474	Ddc
XLOC_002479	ND	D	OK	10.7464	7.57885	-0.5038	-1.74453	0.00245	0.00905866	yes	XLOC_002479	CG17568
XLOC_002485	ND	D	OK	55.2589	126.883	1.19922	5.34407	5e-05	0.000273369	yes	XLOC_002485	fon
XLOC_002486	ND	D	OK	129.045	194.868	0.594622	2.65768	5e-05	0.000273369	yes	XLOC_002486	CG17549
XLOC_002487	ND	D	OK	19.6538	29.4594	0.583919	2.52598	5e-05	0.000273369	yes	XLOC_002487	CG17544
XLOC_002491	ND	D	OK	163.301	86.273	-0.920555	-3.64463	5e-05	0.000273369	yes	XLOC_002491	Top2
XLOC_002495	ND	D	OK	33.9715	12.3856	-1.45567	-6.38777	5e-05	0.000273369	yes	XLOC_002495	CG10188
XLOC_002509	ND	D	OK	34.4676	12.5846	-1.45359	-5.92796	5e-05	0.000273369	yes	XLOC_002509	CG10631
XLOC_002511	ND	D	OK	61.7835	104.762	0.761818	3.39783	5e-05	0.000273369	yes	XLOC_002511	fbp
XLOC_002513	ND	D	OK	49.1143	18.6435	-1.39747	-5.94041	5e-05	0.000273369	yes	XLOC_002513	CdGAPr
XLOC_002514	ND	D	OK	46.9022	34.2828	-0.452171	-1.91664	0.0011	0.00447501	yes	XLOC_002514	fs(2)ltoPP43
XLOC_002523	ND	D	OK	63.7786	97.8466	0.617449	2.56643	5e-05	0.000273369	yes	XLOC_002523	CG18806,Hf
XLOC_002525	ND	D	OK	11.3271	17.7823	0.650663	1.64628	0.0047	0.0158363	yes	XLOC_002525	CG10659
XLOC_002526	ND	D	OK	23.6575	15.6964	-0.591862	-2.54117	5e-05	0.000273369	yes	XLOC_002526	barr
XLOC_002539	ND	D	OK	128.28	218.487	0.768255	3.4457	5e-05	0.000273369	yes	XLOC_002539	CG17571
XLOC_002541	ND	D	OK	0	1.0908	Inf	NA	0.0006	0.00262067	yes	XLOC_002541	CG17570
XLOC_002549	ND	D	OK	8.5027	11.4638	0.431095	1.49023	0.00935	0.0284853	yes	XLOC_002549	CG18858
XLOC_002555	ND	D	OK	40.2281	21.6841	-0.891564	-3.8363	5e-05	0.000273369	yes	XLOC_002555	CG2478
XLOC_002556	ND	D	OK	29.9125	12.7592	-1.22921	-4.18485	5e-05	0.000273369	yes	XLOC_002556	CG31678
XLOC_002557	ND	D	OK	58.7231	42.4733	-0.467371	-1.8227	0.0018	0.00691238	yes	XLOC_002557	CG1962
XLOC_002563	ND	D	OK	16.7874	10.8732	-0.626607	-1.93886	0.0007	0.00300059	yes	XLOC_002563	CG9323
XLOC_002568	ND	D	OK	4.86765	8.46617	0.798483	1.45137	0.01295	0.0377519	yes	XLOC_002568	CheB38c
XLOC_002571	ND	D	OK	8.10354	15.6634	0.950777	2.44622	0.00025	0.00119769	yes	XLOC_002571	CG14400
XLOC_002573	ND	D	OK	47.2721	36.4668	-0.374406	-1.47482	0.01035	0.0311114	yes	XLOC_002573	CG9339
XLOC_002575	ND	D	OK	106.707	82.789	-0.366141	-1.63387	0.0042	0.0144199	yes	XLOC_002575	RPA2
XLOC_002580	ND	D	OK	3.40442	8.1591	1.261	2.68477	5e-05	0.000273369	yes	XLOC_002580	CG33511
XLOC_002581	ND	D	OK	1.29021	5.43578	2.07488	3.52353	5e-05	0.000273369	yes	XLOC_002581	CG33510
XLOC_002582	ND	D	OK	1.65849	5.09902	1.62035	3.11119	5e-05	0.000273369	yes	XLOC_002582	CG33509
XLOC_002585	ND	D	OK	24.8677	18.3043	-0.442093	-1.98242	0.00075	0.0031853	yes	XLOC_002585	Dap160
XLOC_002587	ND	D	OK	51.3958	39.9303	-0.364166	-1.61461	0.00575	0.0188057	yes	XLOC_002587	E2f2
XLOC_002597	ND	D	OK	14.8638	9.12464	-0.703968	-1.8415	0.00505	0.0168035	yes	XLOC_002597	CG8679
XLOC_002604	ND	D	OK	3.77027	1.48566	-1.34356	-1.62291	0.0121	0.0356635	yes	XLOC_002604	His2B:CG17949
XLOC_002647	ND	D	OK	79.5	41.0173	-0.954723	-3.32368	5e-05	0.000273369	yes	XLOC_002647	His-Psi:CR33867
XLOC_002652	ND	D	OK	1024.81	734.831	-0.479867	-1.81037	0.00165	0.00640425	yes	XLOC_002652	Df31
XLOC_002653	ND	D	OK	8.92081	6.05995	-0.557869	-2.16972	0.0001	0.000521172	yes	XLOC_002653	CG2225
XLOC_002677	ND	D	OK	1.98012	1.4537	-0.445856	-1.37468	0.01695	0.0474619	yes	XLOC_002677	Cht3
XLOC_002691	ND	D	OK	72.5195	58.2838	-0.315273	-1.43403	0.0138	0.0399086	yes	XLOC_002691	CG17082
XLOC_002692	ND	D	OK	222.573	171.994	-0.371919	-1.67117	0.0039	0.0135598	yes	XLOC_002692	CG14464
XLOC_002696	ND	D	OK	87.8045	66.9824	-0.390512	-1.77961	0.0021	0.00789993	yes	XLOC_002696	d4
XLOC_002698	ND	D	OK	41.541	31.5886	-0.39513	-1.71685	0.00435	0.0148444	yes	XLOC_002698	CG10395
XLOC_002701	ND	D	OK	10.0287	12.7649	0.34804	1.43881	0.0141	0.0405565	yes	XLOC_002701	CG42345
XLOC_002703	ND	D	OK	182.325	231.027	0.341551	1.53088	0.00775	0.0242295	yes	XLOC_002703	CG17508
XLOC_002708	ND	D	OK	81.6245	60.355	-0.43553	-1.94466	0.0011	0.00447501	yes	XLOC_002708	vlc
XLOC_002711	ND	D	OK	70.4471	36.6195	-0.943929	-4.03408	5e-05	0.000273369	yes	XLOC_002711	gp210
XLOC_002721	ND	D	OK	10.1596	19.2449	0.921633	1.96414	0.0016	0.00623883	yes	XLOC_002721	CG34211
XLOC_002739	ND	D	OK	94.6868	40.3559	-1.23038	-5.16009	5e-05	0.000273369	yes	XLOC_002739	bin3
XLOC_002741	ND	D	OK	24.2797	16.0125	-0.600556	-2.70751	5e-05	0.000273369	yes	XLOC_002741	Pld
XLOC_002742	ND	D	OK	35.8099	15.1543	-1.24063	-5.00947	5e-05	0.000273369	yes	XLOC_002742	jing
XLOC_002743	ND	D	OK	69.4952	25.5726	-1.44231	-6.1886	5e-05	0.000273369	yes	XLOC_002743	Bap170
XLOC_002746	ND	D	OK	39.1628	23.2114	-0.754652	-3.39114	5e-05	0.000273369	yes	XLOC_002746	sced
XLOC_002754	ND	D	OK	19.7127	14.5451	-0.438585	-1.92917	0.0007	0.00300059	yes	XLOC_002754	phtf
XLOC_002757	ND	D	OK	205.516	283.095	0.462038	1.97005	0.0008	0.00337364	yes	XLOC_002757	SdhB
XLOC_002759	ND	D	OK	7.67594	4.62245	-0.731686	-2.15207	0.00025	0.00119769	yes	XLOC_002759	koi
XLOC_002763	ND	D	OK	0.810428	1.40085	0.789547	1.56131	0.0094	0.0285947	yes	XLOC_002763	CG30158
XLOC_002767	ND	D	OK	18.8986	13.4165	-0.494265	-1.96529	0.0008	0.00337364	yes	XLOC_002767	CG17002
XLOC_002769	ND	D	OK	5.45492	15.4114	1.49837	1.72309	0.00935	0.0284853	yes	XLOC_002769	Tsp42Eb
XLOC_002771	ND	D	OK	30.9651	55.5131	0.842185	3.31737	5e-05	0.000273369	yes	XLOC_002771	Tsp42Ec
XLOC_002772	ND	D	OK	203.168	259.007	0.350314	1.51452	0.0087	0.0267623	yes	XLOC_002772	Tsp42Ee
XLOC_002773	ND	D	OK	50.186	62.355	0.313221	1.39098	0.01635	0.0460744	yes	XLOC_002773	Tsp42Ef
XLOC_002774	ND	D	OK	35.445	53.2323	0.58672	2.40479	5e-05	0.000273369	yes	XLOC_002774	Tsp42Eg
XLOC_002775	ND	D	OK	4.91988	9.01237	0.873283	1.82172	0.002	0.00757148	yes	XLOC_002775	Tsp42Eh
XLOC_002776	ND	D	OK	18.7163	29.6443	0.66346	2.39817	5e-05	0.000273369	yes	XLOC_002776	Tsp42Ei
XLOC_002780	ND	D	OK	26.3186	35.2144	0.420083	1.5334	0.00915	0.0279938	yes	XLOC_002780	Tsp42El
XLOC_002781	ND	D	OK	9.20709	14.6943	0.674442	1.85508	0.0018	0.00691238	yes	XLOC_002781	lbm
XLOC_002784	ND	D	OK	29.7257	55.8708	0.910384	3.36322	5e-05	0.000273369	yes	XLOC_002784	Tsp42Er
XLOC_002793	ND	D	OK	7.42735	10.8998	0.553385	1.80542	0.00145	0.00571103	yes	XLOC_002793	Gadd45
XLOC_002794	ND	D	OK	60.7926	35.4662	-0.777451	-3.43893	5e-05	0.000273369	yes	XLOC_002794	Incenp
XLOC_002796	ND	D	OK	0.243724	1.19939	2.29898	2.29485	0.00175	0.00674848	yes	XLOC_002796	CG12164
XLOC_002804	ND	D	OK	69.7282	31.9424	-1.12627	-4.35528	5e-05	0.000273369	yes	XLOC_002804	didum
XLOC_002806	ND	D	OK	309.644	431.315	0.478134	1.85601	0.0011	0.00447501	yes	XLOC_002806	CG2137,Cyt-b5
XLOC_002807	ND	D	OK	2.05137	1.33351	-0.621365	-1.68803	0.0046	0.0155614	yes	XLOC_002807	Corin
XLOC_002808	ND	D	OK	39.7449	26.5006	-0.584743	-2.34866	5e-05	0.000273369	yes	XLOC_002808	Vps13
XLOC_002809	ND	D	OK	61.979	27.7516	-1.15921	-5.01036	5e-05	0.000273369	yes	XLOC_002809	scra
XLOC_002814	ND	D	OK	17.2452	27.0278	0.648255	2.3224	0.0001	0.000521172	yes	XLOC_002814	CG2070
XLOC_002815	ND	D	OK	6.13759	11.1939	0.866965	2.41962	0.00015	0.000751259	yes	XLOC_002815	CG2065
XLOC_002820	ND	D	OK	4.24968	14.7016	1.79055	4.45888	5e-05	0.000273369	yes	XLOC_002820	CG1942
XLOC_002823	ND	D	OK	93.8408	174.856	0.897884	3.77815	5e-05	0.000273369	yes	XLOC_002823	CG12825
XLOC_002824	ND	D	OK	15.1796	29.4267	0.954993	2.4569	5e-05	0.000273369	yes	XLOC_002824	CG12824
XLOC_002827	ND	D	OK	37.0288	60.4199	0.706377	3.19208	5e-05	0.000273369	yes	XLOC_002827	CG1882
XLOC_002828	ND	D	OK	19.2661	14.199	-0.440275	-1.65201	0.00405	0.0140045	yes	XLOC_002828	phr
XLOC_002831	ND	D	OK	35.1795	19.0835	-0.882407	-3.88802	5e-05	0.000273369	yes	XLOC_002831	CG30377
XLOC_002832	ND	D	OK	87.9837	68.0619	-0.370388	-1.59926	0.00705	0.0223931	yes	XLOC_002832	lin19
XLOC_002834	ND	D	OK	25.9777	12.0948	-1.10289	-4.88345	5e-05	0.000273369	yes	XLOC_002834	drosha
XLOC_002840	ND	D	OK	56.912	30.7296	-0.889103	-2.92528	5e-05	0.000273369	yes	XLOC_002840	nito
XLOC_002843	ND	D	OK	29.3195	45.472	0.633121	2.64205	5e-05	0.000273369	yes	XLOC_002843	Odc1
XLOC_002846	ND	D	OK	201.589	109.07	-0.886166	-3.42646	5e-05	0.000273369	yes	XLOC_002846	lig
XLOC_002847	ND	D	OK	88.9471	60.9726	-0.544786	-2.45837	5e-05	0.000273369	yes	XLOC_002847	sut1
XLOC_002848	ND	D	OK	3.15665	5.47004	0.79316	1.71606	0.0037	0.0129936	yes	XLOC_002848	sut2
XLOC_002853	ND	D	OK	53.2249	41.7163	-0.351488	-1.41823	0.0136	0.0394202	yes	XLOC_002853	CG2158
XLOC_002860	ND	D	OK	37.7892	18.5505	-1.02652	-4.1119	5e-05	0.000273369	yes	XLOC_002860	CG33087
XLOC_002861	ND	D	OK	88.8762	65.9044	-0.431424	-1.89832	0.00095	0.00393422	yes	XLOC_002861	pnut
XLOC_002867	ND	D	OK	3.35928	1.64183	-1.03285	-1.52939	0.01165	0.0344775	yes	XLOC_002867	CG14755
XLOC_002870	ND	D	OK	3.15748	2.2394	-0.495659	-1.48053	0.00965	0.0292499	yes	XLOC_002870	pdm3
XLOC_002874	ND	D	OK	69.8298	92.6871	0.408525	1.83344	0.001	0.00411942	yes	XLOC_002874	Cyp4e2
XLOC_002876	ND	D	OK	22.3171	29.7563	0.415043	1.80007	0.00195	0.00740708	yes	XLOC_002876	LvpD
XLOC_002877	ND	D	OK	14.0279	21.4199	0.610658	2.4055	0.0001	0.000521172	yes	XLOC_002877	CG8693
XLOC_002879	ND	D	OK	103.95	138.892	0.418065	1.83468	0.00125	0.00500493	yes	XLOC_002879	CG30360
XLOC_002882	ND	D	OK	10.9181	18.9583	0.796114	2.84717	5e-05	0.000273369	yes	XLOC_002882	Cyp6a13
XLOC_002884	ND	D	OK	18.134	10.479	-0.791203	-3.32419	5e-05	0.000273369	yes	XLOC_002884	rgr
XLOC_002885	ND	D	OK	62.0951	37.8833	-0.712918	-2.96738	5e-05	0.000273369	yes	XLOC_002885	Cirl
XLOC_002887	ND	D	OK	21.2281	15.1378	-0.487813	-2.05056	0.0005	0.00222999	yes	XLOC_002887	CG14749
XLOC_002892	ND	D	OK	9.57183	23.0129	1.26558	3.83498	5e-05	0.000273369	yes	XLOC_002892	Jon44E
XLOC_002893	ND	D	OK	4.43976	9.35449	1.07518	3.05755	5e-05	0.000273369	yes	XLOC_002893	CG8738
XLOC_002896	ND	D	OK	2.59913	5.23786	1.01095	1.50305	0.01405	0.0404471	yes	XLOC_002896	PGRP-SC1b
XLOC_002897	ND	D	OK	86.6546	177.28	1.03268	4.38654	5e-05	0.000273369	yes	XLOC_002897	PGRP-SC2
XLOC_002904	ND	D	OK	12.0432	9.2804	-0.375961	-1.60893	0.00585	0.0190897	yes	XLOC_002904	Rya-r44F
XLOC_002906	ND	D	OK	37.3041	28.3002	-0.398522	-1.59413	0.0056	0.0183803	yes	XLOC_002906	sec31
XLOC_002910	ND	D	OK	28.1213	12.0571	-1.22178	-4.53575	5e-05	0.000273369	yes	XLOC_002910	lin
XLOC_002911	ND	D	OK	73.4529	52.0962	-0.49564	-2.23066	5e-05	0.000273369	yes	XLOC_002911	CG8243
XLOC_002913	ND	D	OK	28.706	22.7358	-0.336383	-1.51674	0.00845	0.0260882	yes	XLOC_002913	CG8232
XLOC_002917	ND	D	OK	40.9973	28.352	-0.532081	-2.39294	5e-05	0.000273369	yes	XLOC_002917	babo
XLOC_002919	ND	D	OK	2.71993	5.33929	0.973077	2.74936	5e-05	0.000273369	yes	XLOC_002919	ana
XLOC_002920	ND	D	OK	3.4238	7.24907	1.0822	2.89231	5e-05	0.000273369	yes	XLOC_002920	CG8083
XLOC_002923	ND	D	OK	191.981	267.948	0.480986	1.86228	0.00095	0.00393422	yes	XLOC_002923	Uhg4
XLOC_002932	ND	D	OK	30.3752	24.7118	-0.29769	-1.34862	0.0172	0.0480955	yes	XLOC_002932	Vang
XLOC_002935	ND	D	OK	95.1918	66.1394	-0.525326	-2.30116	0.0001	0.000521172	yes	XLOC_002935	Su(var)2-10
XLOC_002940	ND	D	OK	30.712	41.7987	0.444656	1.94256	0.00105	0.00429572	yes	XLOC_002940	CG30344
XLOC_002941	ND	D	OK	9.98059	15.7457	0.65776	2.12207	0.0003	0.00140992	yes	XLOC_002941	CG30345
XLOC_002944	ND	D	OK	188.435	245.118	0.37941	1.61988	0.0038	0.0132575	yes	XLOC_002944	CG8029
XLOC_002946	ND	D	OK	29.9484	60.9846	1.02597	3.12009	5e-05	0.000273369	yes	XLOC_002946	Cyp4p1
XLOC_002950	ND	D	OK	48.59	32.6703	-0.572678	-2.51962	5e-05	0.000273369	yes	XLOC_002950	Drep-2
XLOC_002952	ND	D	OK	3.64428	2.61706	-0.477687	-1.49222	0.0095	0.028847	yes	XLOC_002952	l(2)03659
XLOC_002954	ND	D	OK	41.2882	31.0076	-0.413106	-1.8024	0.0018	0.00691238	yes	XLOC_002954	wun2
XLOC_002957	ND	D	OK	21.2987	8.60621	-1.30731	-5.74212	5e-05	0.000273369	yes	XLOC_002957	Camta
XLOC_002959	ND	D	OK	6.12692	4.65486	-0.396425	-1.57057	0.00905	0.0277129	yes	XLOC_002959	brp
XLOC_002962	ND	D	OK	11.995	22.5975	0.913737	3.47177	5e-05	0.000273369	yes	XLOC_002962	CG1809
XLOC_002974	ND	D	OK	39.5004	28.0479	-0.493972	-2.20583	0.0001	0.000521172	yes	XLOC_002974	dap
XLOC_002977	ND	D	OK	2.81727	8.05526	1.51563	4.6619	5e-05	0.000273369	yes	XLOC_002977	CG1698
XLOC_002991	ND	D	OK	11.8088	6.2737	-0.912475	-3.87588	5e-05	0.000273369	yes	XLOC_002991	CG30007
XLOC_002992	ND	D	OK	1.8601	3.51487	0.91809	1.78245	0.00395	0.0136914	yes	XLOC_002992	Fmrf
XLOC_002993	ND	D	OK	45.1953	58.4863	0.371925	1.68509	0.00355	0.0125494	yes	XLOC_002993	CG12140
XLOC_003001	ND	D	OK	45.1007	34.5012	-0.386503	-1.66082	0.00425	0.0145571	yes	XLOC_003001	CG12129
XLOC_003006	ND	D	OK	6.93925	11.6762	0.750722	2.69311	5e-05	0.000273369	yes	XLOC_003006	egr
XLOC_003011	ND	D	OK	29.5817	21.1062	-0.487037	-1.86135	0.0015	0.00588283	yes	XLOC_003011	CG11866
XLOC_003023	ND	D	OK	15.3142	26.7097	0.802492	2.61804	5e-05	0.000273369	yes	XLOC_003023	Prx2540-2
XLOC_003026	ND	D	OK	67.8688	44.6534	-0.603977	-2.6283	5e-05	0.000273369	yes	XLOC_003026	RanBPM
XLOC_003030	ND	D	OK	110.246	49.9563	-1.14199	-4.64153	5e-05	0.000273369	yes	XLOC_003030	psq
XLOC_003032	ND	D	OK	13.0093	16.6573	0.356619	1.44646	0.01225	0.0360428	yes	XLOC_003032	StIP
XLOC_003033	ND	D	OK	6.44862	13.2176	1.0354	2.59148	0.00015	0.000751259	yes	XLOC_003033	CG12934
XLOC_003036	ND	D	OK	74.6762	95.1234	0.349151	1.58486	0.00665	0.0213162	yes	XLOC_003036	CG7220
XLOC_003039	ND	D	OK	17.1691	10.3187	-0.734561	-1.62518	0.0064	0.0206256	yes	XLOC_003039	mms4
XLOC_003040	ND	D	OK	46.3095	36.9844	-0.32439	-1.44721	0.01295	0.0377519	yes	XLOC_003040	CG7222
XLOC_003042	ND	D	OK	73.0073	97.6877	0.420137	1.46613	0.012	0.0354306	yes	XLOC_003042	RpS15Ab
XLOC_003043	ND	D	OK	20.2903	13.5318	-0.584444	-2.45643	5e-05	0.000273369	yes	XLOC_003043	CG12325
XLOC_003046	ND	D	OK	28.1649	20.9	-0.430391	-1.61601	0.00705	0.0223931	yes	XLOC_003046	CG18004
XLOC_003047	ND	D	OK	29.6889	19.2478	-0.625227	-2.58422	5e-05	0.000273369	yes	XLOC_003047	CG30020
XLOC_003055	ND	D	OK	38.1665	17.6644	-1.11146	-4.51279	5e-05	0.000273369	yes	XLOC_003055	shn
XLOC_003064	ND	D	OK	46.9387	146.405	1.64112	6.05945	5e-05	0.000273369	yes	XLOC_003064	CG34227
XLOC_003068	ND	D	OK	2.06676	3.42387	0.728256	1.44666	0.0147	0.0420794	yes	XLOC_003068	Cpr47Ee
XLOC_003073	ND	D	OK	16.4288	12.0113	-0.451837	-1.74073	0.0017	0.00657066	yes	XLOC_003073	CG7745
XLOC_003075	ND	D	OK	49.9729	74.6554	0.5791	2.51601	0.0001	0.000521172	yes	XLOC_003075	lambdaTry
XLOC_003076	ND	D	OK	414.463	556.052	0.423978	1.82325	0.00165	0.00640425	yes	XLOC_003076	betaTry
XLOC_003078	ND	D	OK	1.77779	4.01858	1.1766	1.68188	0.0076	0.023834	yes	XLOC_003078	deltaTry
XLOC_003079	ND	D	OK	23.3071	33.0849	0.505406	1.73052	0.0032	0.0114397	yes	XLOC_003079	iotaTry
XLOC_003080	ND	D	OK	189.983	150.419	-0.33689	-1.51519	0.0082	0.0254248	yes	XLOC_003080	Gr47b,san
XLOC_003084	ND	D	OK	2.0474	3.64305	0.831351	1.86795	0.0024	0.00889974	yes	XLOC_003084	CG7759
XLOC_003088	ND	D	OK	98.8503	36.6222	-1.43253	-5.5232	5e-05	0.000273369	yes	XLOC_003088	E(Pc)
XLOC_003093	ND	D	OK	96.8591	261.829	1.43467	5.46643	5e-05	0.000273369	yes	XLOC_003093	CG30035
XLOC_003104	ND	D	OK	119.807	43.5818	-1.45891	-5.68647	5e-05	0.000273369	yes	XLOC_003104	Mtor
XLOC_003113	ND	D	OK	30.6465	18.0042	-0.767389	-3.29294	5e-05	0.000273369	yes	XLOC_003113	CG8290
XLOC_003116	ND	D	OK	36.9006	23.2217	-0.66817	-3.01711	5e-05	0.000273369	yes	XLOC_003116	pds5
XLOC_003120	ND	D	OK	31.7967	23.5438	-0.433527	-1.92936	0.00085	0.00356227	yes	XLOC_003120	Drep-1
XLOC_003124	ND	D	OK	37.5419	29.3097	-0.357123	-1.59858	0.0049	0.016385	yes	XLOC_003124	CG8378
XLOC_003127	ND	D	OK	7.27458	16.6603	1.19548	2.53534	5e-05	0.000273369	yes	XLOC_003127	CG13177
XLOC_003130	ND	D	OK	31.4854	21.2038	-0.570364	-2.37031	5e-05	0.000273369	yes	XLOC_003130	wash
XLOC_003132	ND	D	OK	96.2946	165.021	0.77712	3.35846	5e-05	0.000273369	yes	XLOC_003132	Cyp6g1
XLOC_003142	ND	D	OK	11.8439	15.7719	0.413212	1.73764	0.0023	0.00856651	yes	XLOC_003142	CG17739
XLOC_003144	ND	D	OK	5.68271	10.7817	0.923937	3.34501	5e-05	0.000273369	yes	XLOC_003144	CG30046
XLOC_003146	ND	D	OK	37.5495	18.4018	-1.02895	-4.57173	5e-05	0.000273369	yes	XLOC_003146	garz
XLOC_003152	ND	D	OK	29.0552	11.0223	-1.39837	-6.17069	5e-05	0.000273369	yes	XLOC_003152	ana3
XLOC_003159	ND	D	OK	0	24.2312	Inf	NA	5e-05	0.000273369	yes	XLOC_003159	CG13159
XLOC_003161	ND	D	OK	79.194	107.629	0.442601	1.99485	0.0007	0.00300059	yes	XLOC_003161	Cpr49Ab
XLOC_003166	ND	D	OK	9.79353	17.9436	0.873569	2.9095	5e-05	0.000273369	yes	XLOC_003166	Cpr49Ae
XLOC_003178	ND	D	OK	59.1311	45.8589	-0.366715	-1.51729	0.006	0.0195289	yes	XLOC_003178	CG8545
XLOC_003185	ND	D	OK	16.5973	9.57423	-0.793721	-3.24415	5e-05	0.000273369	yes	XLOC_003185	CG30056,fra
XLOC_003197	ND	D	OK	38.8138	22.6342	-0.77807	-3.51064	5e-05	0.000273369	yes	XLOC_003197	Iswi
XLOC_003205	ND	D	OK	662.537	998.727	0.592088	2.25301	5e-05	0.000273369	yes	XLOC_003205	CG12374
XLOC_003212	ND	D	OK	341.364	172.027	-0.988679	-3.6327	5e-05	0.000273369	yes	XLOC_003212	NAT1
XLOC_003214	ND	D	OK	47.1297	73.137	0.633966	2.82711	5e-05	0.000273369	yes	XLOC_003214	sug
XLOC_003216	ND	D	OK	61.9797	122.375	0.981447	4.39426	5e-05	0.000273369	yes	XLOC_003216	CG13321
XLOC_003218	ND	D	OK	9.22624	4.75488	-0.956334	-4.0019	5e-05	0.000273369	yes	XLOC_003218	Su(z)2
XLOC_003219	ND	D	OK	1.96375	4.87392	1.31147	3.32135	5e-05	0.000273369	yes	XLOC_003219	CG13325
XLOC_003220	ND	D	OK	32.0678	18.1679	-0.819737	-3.67848	5e-05	0.000273369	yes	XLOC_003220	Cap-G
XLOC_003223	ND	D	OK	46.8593	61.2118	0.385475	1.74874	0.002	0.00757148	yes	XLOC_003223	CG33138
XLOC_003226	ND	D	OK	7.51292	5.64617	-0.412103	-1.58343	0.0056	0.0183803	yes	XLOC_003226	CG4616
XLOC_003233	ND	D	OK	124.419	190.574	0.615139	2.78469	5e-05	0.000273369	yes	XLOC_003233	Mp20
XLOC_003234	ND	D	OK	606.695	1019.66	0.749047	2.97888	5e-05	0.000273369	yes	XLOC_003234	CG4716
XLOC_003235	ND	D	OK	55.7503	94.5631	0.762297	3.06756	5e-05	0.000273369	yes	XLOC_003235	CG10799
XLOC_003236	ND	D	OK	20.9995	32.3824	0.624852	2.28046	5e-05	0.000273369	yes	XLOC_003236	CG42319
XLOC_003238	ND	D	OK	14.6898	79.5586	2.43721	8.4086	5e-05	0.000273369	yes	XLOC_003238	AttC
XLOC_003250	ND	D	OK	42.8488	28.4727	-0.589676	-2.33369	5e-05	0.000273369	yes	XLOC_003250	cid
XLOC_003251	ND	D	OK	38.5392	19.1452	-1.00934	-2.39131	0.0005	0.00222999	yes	XLOC_003251	mars
XLOC_003258	ND	D	OK	0.163664	1.945	3.57096	3.2197	0.00065	0.00281122	yes	XLOC_003258	CG13333
XLOC_003271	ND	D	OK	0.150821	1.16966	2.95519	2.36477	0.00455	0.0154232	yes	XLOC_003271	CG6347
XLOC_003272	ND	D	OK	88.8285	150.382	0.759533	3.33443	5e-05	0.000273369	yes	XLOC_003272	CG6357
XLOC_003276	ND	D	OK	33.8325	24.2721	-0.479112	-2.09599	0.00025	0.00119769	yes	XLOC_003276	CG13344
XLOC_003281	ND	D	OK	35.3262	16.9933	-1.05577	-3.87839	5e-05	0.000273369	yes	XLOC_003281	mam
XLOC_003284	ND	D	OK	22.0381	12.0876	-0.866473	-3.79145	5e-05	0.000273369	yes	XLOC_003284	pea
XLOC_003286	ND	D	OK	44.179	31.3151	-0.496503	-2.09225	0.0002	0.000976131	yes	XLOC_003286	O-fut1
XLOC_003287	ND	D	OK	25.7047	40.5419	0.657383	2.13639	0.0002	0.000976131	yes	XLOC_003287	CG18327,CG8323
XLOC_003288	ND	D	OK	21.6943	33.1067	0.609809	2.23538	0.00025	0.00119769	yes	XLOC_003288	CG18324
XLOC_003290	ND	D	OK	70.7713	50.6949	-0.481325	-2.05035	0.00035	0.00161865	yes	XLOC_003290	cg
XLOC_003293	ND	D	OK	56.8919	41.5987	-0.451683	-1.75608	0.00195	0.00740708	yes	XLOC_003293	CG8494,CG8503
XLOC_003301	ND	D	OK	7.52307	12.9748	0.786313	2.06967	0.00065	0.00281122	yes	XLOC_003301	Arc2
XLOC_003312	ND	D	OK	17.1741	11.1034	-0.629234	-2.42093	5e-05	0.000273369	yes	XLOC_003312	Sin1
XLOC_003318	ND	D	OK	33.4579	12.2076	-1.45457	-6.33338	5e-05	0.000273369	yes	XLOC_003318	Asx
XLOC_003319	ND	D	OK	218.385	333.523	0.610913	2.59011	5e-05	0.000273369	yes	XLOC_003319	CG30197
XLOC_003320	ND	D	OK	18.7576	12.4959	-0.586016	-1.53436	0.01035	0.0311114	yes	XLOC_003320	ttv
XLOC_003334	ND	D	OK	3.81626	7.93349	1.0558	2.30507	0.00055	0.00242421	yes	XLOC_003334	CG10131
XLOC_003338	ND	D	OK	8.53763	56.4653	2.72546	4.65165	5e-05	0.000273369	yes	XLOC_003338	Dro
XLOC_003339	ND	D	OK	1.05061	5.95377	2.50258	3.23248	0.0002	0.000976131	yes	XLOC_003339	AttA
XLOC_003344	ND	D	OK	13.5318	22.0342	0.703388	1.89274	0.0013	0.00518263	yes	XLOC_003344	CG10200
XLOC_003345	ND	D	OK	5.62845	10.1162	0.845864	1.9711	0.0008	0.00337364	yes	XLOC_003345	CG10205
XLOC_003349	ND	D	OK	16.2123	21.2377	0.389539	1.52217	0.00865	0.0266247	yes	XLOC_003349	Cyp6a17
XLOC_003350	ND	D	OK	26.9603	51.4089	0.931182	4.09771	5e-05	0.000273369	yes	XLOC_003350	Cyp6a23
XLOC_003351	ND	D	OK	166.178	117.925	-0.494856	-1.93968	0.0012	0.00482187	yes	XLOC_003351	Cyp6a19
XLOC_003352	ND	D	OK	45.5493	72.3	0.666566	3.01628	5e-05	0.000273369	yes	XLOC_003352	Cyp6a20
XLOC_003355	ND	D	OK	19.4427	14.1595	-0.457461	-2.05025	0.00055	0.00242421	yes	XLOC_003355	Lap1
XLOC_003360	ND	D	OK	53.1655	22.5535	-1.23714	-5.2446	5e-05	0.000273369	yes	XLOC_003360	chn
XLOC_003368	ND	D	OK	16.4005	22.8192	0.476514	2.13197	0.0001	0.000521172	yes	XLOC_003368	scb
XLOC_003370	ND	D	OK	46.8098	33.616	-0.477662	-1.96878	0.00095	0.00393422	yes	XLOC_003370	mus210
XLOC_003374	ND	D	OK	66.472	42.668	-0.639593	-2.07162	0.00035	0.00161865	yes	XLOC_003374	SRPK
XLOC_003375	ND	D	OK	25.4346	77.4308	1.60612	2.8937	5e-05	0.000273369	yes	XLOC_003375	Mtk
XLOC_003377	ND	D	OK	8.60079	5.03266	-0.773148	-1.83989	0.0026	0.00956445	yes	XLOC_003377	CG34318,CG8179
XLOC_003385	ND	D	OK	14.259	9.41534	-0.59879	-1.55097	0.00795	0.0247632	yes	XLOC_003385	CG30467
XLOC_003386	ND	D	OK	181.436	230.675	0.346395	1.5323	0.0079	0.0246226	yes	XLOC_003386	Vha36
XLOC_003388	ND	D	OK	30.6529	52.0766	0.764613	2.82751	5e-05	0.000273369	yes	XLOC_003388	CG12963
XLOC_003390	ND	D	OK	5.78755	2.45743	-1.2358	-2.97685	5e-05	0.000273369	yes	XLOC_003390	CG42524
XLOC_003393	ND	D	OK	32.6323	21.3689	-0.610784	-2.72769	5e-05	0.000273369	yes	XLOC_003393	Ranbp11
XLOC_003402	ND	D	OK	32.5109	23.5082	-0.46776	-2.04152	0.00055	0.00242421	yes	XLOC_003402	tun
XLOC_003415	ND	D	OK	49.181	29.045	-0.759812	-3.41775	5e-05	0.000273369	yes	XLOC_003415	CG8405
XLOC_003418	ND	D	OK	15.9931	22.2095	0.473722	2.03443	0.00035	0.00161865	yes	XLOC_003418	Asph
XLOC_003426	ND	D	OK	13.9114	9.57559	-0.538833	-2.33176	5e-05	0.000273369	yes	XLOC_003426	lbk
XLOC_003428	ND	D	OK	72.132	44.9494	-0.682339	-2.76952	5e-05	0.000273369	yes	XLOC_003428	CG8443
XLOC_003435	ND	D	OK	29.4994	22.9334	-0.363234	-1.56811	0.0065	0.0208948	yes	XLOC_003435	csul
XLOC_003440	ND	D	OK	26.2053	52.0128	0.98901	4.27901	5e-05	0.000273369	yes	XLOC_003440	JhI-26
XLOC_003443	ND	D	OK	11.3793	7.48505	-0.604323	-2.50092	5e-05	0.000273369	yes	XLOC_003443	Nox
XLOC_003444	ND	D	OK	17.1543	12.735	-0.42978	-1.78836	0.0018	0.00691238	yes	XLOC_003444	CG4282
XLOC_003450	ND	D	OK	3.16647	5.33364	0.752242	1.36676	0.0166	0.0466622	yes	XLOC_003450	CG4409
XLOC_003457	ND	D	OK	46.7152	37.3945	-0.321066	-1.44442	0.0121	0.0356635	yes	XLOC_003457	Sema-2a
XLOC_003465	ND	D	OK	33.5269	41.9491	0.323323	1.46137	0.01235	0.0363054	yes	XLOC_003465	CG5065
XLOC_003466	ND	D	OK	2.9557	1.9806	-0.577559	-1.73235	0.0029	0.0105192	yes	XLOC_003466	gprs
XLOC_003467	ND	D	OK	0.226826	0.90815	2.00134	1.81108	0.0103	0.0309978	yes	XLOC_003467	CG34457
XLOC_003469	ND	D	OK	247.351	344.173	0.476574	1.7436	0.0024	0.00889974	yes	XLOC_003469	Chit
XLOC_003476	ND	D	OK	33.7726	25.2987	-0.416788	-1.8856	0.00115	0.00464858	yes	XLOC_003476	CG5522
XLOC_003478	ND	D	OK	7.21721	38.9816	2.43328	6.89103	5e-05	0.000273369	yes	XLOC_003478	CG5550
XLOC_003484	ND	D	OK	121.729	76.0019	-0.67956	-2.90413	5e-05	0.000273369	yes	XLOC_003484	Dek
XLOC_003486	ND	D	OK	127.088	199.491	0.650487	2.90706	5e-05	0.000273369	yes	XLOC_003486	CG6426
XLOC_003497	ND	D	OK	7.51022	10.2052	0.442375	1.66346	0.00455	0.0154232	yes	XLOC_003497	Cbp53E
XLOC_003501	ND	D	OK	105.088	47.7217	-1.13888	-4.37273	5e-05	0.000273369	yes	XLOC_003501	RhoGEF2
XLOC_003504	ND	D	OK	20.6557	15.276	-0.435273	-1.93653	0.0006	0.00262067	yes	XLOC_003504	CG9646
XLOC_003505	ND	D	OK	24.6891	44.2192	0.840798	2.7347	5e-05	0.000273369	yes	XLOC_003505	fat-spondin
XLOC_003506	ND	D	OK	42.8413	28.5115	-0.587459	-2.15061	0.0002	0.000976131	yes	XLOC_003506	CG6967
XLOC_003509	ND	D	OK	15.6382	25.0778	0.681338	2.7216	5e-05	0.000273369	yes	XLOC_003509	CG15611
XLOC_003510	ND	D	OK	78.869	145.762	0.886084	3.98726	5e-05	0.000273369	yes	XLOC_003510	Amy-d
XLOC_003513	ND	D	OK	36.9259	65.772	0.832841	3.25636	5e-05	0.000273369	yes	XLOC_003513	CG11400
XLOC_003514	ND	D	OK	40.7326	64.0728	0.653527	2.1802	0.0003	0.00140992	yes	XLOC_003514	CG15917
XLOC_003515	ND	D	OK	45.5012	74.5739	0.712767	3.21214	5e-05	0.000273369	yes	XLOC_003515	CG11395
XLOC_003520	ND	D	OK	17.8879	11.15	-0.681932	-2.80068	5e-05	0.000273369	yes	XLOC_003520	mbl
XLOC_003530	ND	D	OK	93.2094	45.8595	-1.02326	-4.37317	5e-05	0.000273369	yes	XLOC_003530	CG14478
XLOC_003532	ND	D	OK	22.9751	35.9642	0.646491	2.81713	5e-05	0.000273369	yes	XLOC_003532	veil
XLOC_003533	ND	D	OK	15.4558	22.4903	0.541151	2.1895	0.00015	0.000751259	yes	XLOC_003533	CG30104
XLOC_003535	ND	D	OK	0.151801	1.28467	3.08115	3.39112	5e-05	0.000273369	yes	XLOC_003535	CG18431,CG4844
XLOC_003543	ND	D	OK	88.8068	28.651	-1.63208	-6.52929	5e-05	0.000273369	yes	XLOC_003543	MESR4
XLOC_003546	ND	D	OK	30.6004	20.1278	-0.604362	-2.70489	5e-05	0.000273369	yes	XLOC_003546	POSH
XLOC_003549	ND	D	OK	45.5039	22.6118	-1.00891	-4.46028	5e-05	0.000273369	yes	XLOC_003549	lack
XLOC_003558	ND	D	OK	104.458	140.695	0.429653	1.9127	0.0008	0.00337364	yes	XLOC_003558	Uhg1
XLOC_003578	ND	D	OK	18.3288	14.344	-0.353663	-1.54583	0.00775	0.0242295	yes	XLOC_003578	CG4996
XLOC_003581	ND	D	OK	10.6057	14.7285	0.473765	1.71021	0.0034	0.0120823	yes	XLOC_003581	CG5002
XLOC_003583	ND	D	OK	24.8104	38.8334	0.646351	2.88173	5e-05	0.000273369	yes	XLOC_003583	CG5009
XLOC_003588	ND	D	OK	73.5694	50.1745	-0.55215	-1.46966	0.0107	0.0320116	yes	XLOC_003588	olf186-F
XLOC_003595	ND	D	OK	14.1926	46.3401	1.70712	7.07183	5e-05	0.000273369	yes	XLOC_003595	CG10910
XLOC_003598	ND	D	OK	36.3463	15.9975	-1.18396	-5.15284	5e-05	0.000273369	yes	XLOC_003598	CG5098
XLOC_003600	ND	D	OK	16.4847	29.1602	0.82287	3.15209	5e-05	0.000273369	yes	XLOC_003600	Spn6
XLOC_003601	ND	D	OK	6.67645	3.98326	-0.745131	-2.00389	0.00095	0.00393422	yes	XLOC_003601	Dip3
XLOC_003602	ND	D	OK	71.2214	35.4519	-1.00645	-4.39833	5e-05	0.000273369	yes	XLOC_003602	Pcl
XLOC_003603	ND	D	OK	772.882	573.002	-0.431709	-1.54667	0.00745	0.0234798	yes	XLOC_003603	pAbp
XLOC_003609	ND	D	OK	31.5443	22.7617	-0.470769	-2.11099	0.00025	0.00119769	yes	XLOC_003609	CG10915
XLOC_003610	ND	D	OK	65.931	85.8376	0.380653	1.6492	0.00375	0.0131147	yes	XLOC_003610	CG42518,MED9
XLOC_003611	ND	D	OK	6.90276	13.5031	0.968041	2.63409	5e-05	0.000273369	yes	XLOC_003611	CG10916
XLOC_003612	ND	D	OK	28.8208	18.9272	-0.606651	-1.56426	0.00785	0.0244893	yes	XLOC_003612	nopo
XLOC_003624	ND	D	OK	358.135	748.549	1.06359	4.33573	5e-05	0.000273369	yes	XLOC_003624	IM1
XLOC_003625	ND	D	OK	298.944	497.425	0.734603	2.76008	5e-05	0.000273369	yes	XLOC_003625	CG18107
XLOC_003626	ND	D	OK	643.197	1474.71	1.1971	5.09756	5e-05	0.000273369	yes	XLOC_003626	IM2
XLOC_003627	ND	D	OK	1316.18	2966.22	1.17227	5.07054	5e-05	0.000273369	yes	XLOC_003627	IM3
XLOC_003628	ND	D	OK	530.331	939.006	0.824242	3.59302	5e-05	0.000273369	yes	XLOC_003628	CG16836
XLOC_003629	ND	D	OK	667.901	1208.27	0.855234	3.22394	5e-05	0.000273369	yes	XLOC_003629	CG15065
XLOC_003630	ND	D	OK	15.963	36.637	1.19857	4.67256	5e-05	0.000273369	yes	XLOC_003630	Idgf5
XLOC_003632	ND	D	OK	3.08051	5.36936	0.80158	1.4116	0.01475	0.0421868	yes	XLOC_003632	GstE2
XLOC_003633	ND	D	OK	74.356	156.431	1.07301	4.67063	5e-05	0.000273369	yes	XLOC_003633	GstE3
XLOC_003636	ND	D	OK	166.543	214.059	0.362116	1.63479	0.00465	0.0156939	yes	XLOC_003636	GstE6
XLOC_003637	ND	D	OK	31.013	44.0911	0.507615	1.87129	0.00095	0.00393422	yes	XLOC_003637	GstE7
XLOC_003638	ND	D	OK	27.0723	36.6386	0.436548	1.47928	0.00935	0.0284853	yes	XLOC_003638	GstE8
XLOC_003640	ND	D	OK	151.161	103.173	-0.551027	-2.01749	0.00045	0.00203564	yes	XLOC_003640	Dp1
XLOC_003648	ND	D	OK	1.19058	2.22574	0.902614	2.0894	0.0008	0.00337364	yes	XLOC_003648	CG10924
XLOC_003649	ND	D	OK	121.038	202.549	0.742809	3.12704	5e-05	0.000273369	yes	XLOC_003649	Pepck
XLOC_003653	ND	D	OK	35.1203	47.3261	0.430331	1.3708	0.01775	0.049497	yes	XLOC_003653	CG5335
XLOC_003658	ND	D	OK	31.7651	14.7297	-1.10872	-4.74823	5e-05	0.000273369	yes	XLOC_003658	CG15072
XLOC_003660	ND	D	OK	36.4936	16.3923	-1.15463	-5.04814	5e-05	0.000273369	yes	XLOC_003660	CG18604
XLOC_003662	ND	D	OK	4.29572	13.4796	1.64981	2.50004	0.0004	0.00182656	yes	XLOC_003662	pncr016:2R
XLOC_003673	ND	D	OK	6.76342	32.3166	2.25645	4.51738	5e-05	0.000273369	yes	XLOC_003673	Dpt
XLOC_003674	ND	D	OK	6.12916	66.7879	3.44583	6.018	5e-05	0.000273369	yes	XLOC_003674	DptB
XLOC_003677	ND	D	OK	25.4699	12.4991	-1.02697	-4.54639	5e-05	0.000273369	yes	XLOC_003677	Topors
XLOC_003684	ND	D	OK	29.0052	15.5463	-0.89974	-2.02042	0.00115	0.00464858	yes	XLOC_003684	ena
XLOC_003685	ND	D	OK	41.2801	51.4768	0.318475	1.41838	0.01435	0.0411821	yes	XLOC_003685	CG10737
XLOC_003686	ND	D	OK	27.034	15.6309	-0.790368	-3.53306	5e-05	0.000273369	yes	XLOC_003686	hppy
XLOC_003689	ND	D	OK	8.06977	14.9929	0.89368	2.52784	0.0002	0.000976131	yes	XLOC_003689	wbl
XLOC_003691	ND	D	OK	0.0954223	1.26471	3.72833	4.17438	5e-05	0.000273369	yes	XLOC_003691	rib
XLOC_003695	ND	D	OK	43.9177	29.9042	-0.554453	-2.49092	5e-05	0.000273369	yes	XLOC_003695	Tab2
XLOC_003699	ND	D	OK	24.796	37.012	0.577887	2.59202	5e-05	0.000273369	yes	XLOC_003699	CG11961
XLOC_003701	ND	D	OK	2.3605	4.62786	0.971256	2.54945	5e-05	0.000273369	yes	XLOC_003701	CG10062
XLOC_003702	ND	D	OK	0.348663	1.18579	1.76594	2.40652	0.0007	0.00300059	yes	XLOC_003702	CG10073
XLOC_003708	ND	D	OK	15.5053	21.3952	0.464525	1.96796	0.0007	0.00300059	yes	XLOC_003708	CalpA
XLOC_003709	ND	D	OK	30.1313	21.8616	-0.462862	-2.08808	0.00025	0.00119769	yes	XLOC_003709	Spt5
XLOC_003713	ND	D	OK	61.6206	37.351	-0.722264	-3.25391	5e-05	0.000273369	yes	XLOC_003713	CG7744
XLOC_003714	ND	D	OK	145.356	92.3957	-0.653697	-2.52128	5e-05	0.000273369	yes	XLOC_003714	mei-W68,par-1
XLOC_003726	ND	D	OK	180.402	364.207	1.01355	1.94298	0.00195	0.00740708	yes	XLOC_003726	CG15126
XLOC_003743	ND	D	OK	14.0075	9.75084	-0.522599	-2.30393	0.00015	0.000751259	yes	XLOC_003743	18w
XLOC_003750	ND	D	OK	37.3684	26.3834	-0.502189	-2.27674	0.0002	0.000976131	yes	XLOC_003750	CG11055
XLOC_003762	ND	D	OK	102.344	152.016	0.570803	2.27964	5e-05	0.000273369	yes	XLOC_003762	Obp57b,Obp57c
XLOC_003764	ND	D	OK	41.9309	73.9987	0.819486	2.82897	5e-05	0.000273369	yes	XLOC_003764	CG13422
XLOC_003766	ND	D	OK	454.315	649.624	0.515912	2.09898	0.0001	0.000521172	yes	XLOC_003766	CG18067
XLOC_003772	ND	D	OK	11.2766	6.84604	-0.719992	-2.9509	5e-05	0.000273369	yes	XLOC_003772	CG16742
XLOC_003788	ND	D	OK	4228.12	6702.42	0.664665	2.36902	0.0003	0.00140992	yes	XLOC_003788	IM14
XLOC_003789	ND	D	OK	11.1412	8.52231	-0.386588	-1.4864	0.0095	0.028847	yes	XLOC_003789	Ipk1
XLOC_003793	ND	D	OK	166.259	299.063	0.847017	3.57526	5e-05	0.000273369	yes	XLOC_003793	Act57B
XLOC_003799	ND	D	OK	47.9328	19.9785	-1.26257	-5.38486	5e-05	0.000273369	yes	XLOC_003799	CG10543
XLOC_003801	ND	D	OK	10.7984	16.6182	0.621948	2.49059	5e-05	0.000273369	yes	XLOC_003801	CG30296
XLOC_003802	ND	D	OK	144.068	183.446	0.348599	1.5683	0.0065	0.0208948	yes	XLOC_003802	CG9350
XLOC_003805	ND	D	OK	7.44962	13.313	0.837603	2.5697	5e-05	0.000273369	yes	XLOC_003805	Cht8
XLOC_003809	ND	D	OK	19.4294	29.7753	0.615875	2.63654	5e-05	0.000273369	yes	XLOC_003809	CG9394
XLOC_003812	ND	D	OK	110.379	147.314	0.416431	1.79192	0.00155	0.00606018	yes	XLOC_003812	Xbp1
XLOC_003817	ND	D	OK	17.8391	24.2147	0.440837	1.78453	0.00165	0.00640425	yes	XLOC_003817	Pu
XLOC_003820	ND	D	OK	135.354	73.2494	-0.885848	-3.4016	5e-05	0.000273369	yes	XLOC_003820	tud
XLOC_003821	ND	D	OK	14.5793	20.4834	0.490528	1.8264	0.00125	0.00500493	yes	XLOC_003821	CG15658
XLOC_003824	ND	D	OK	40.592	51.3757	0.339891	1.52679	0.00775	0.0242295	yes	XLOC_003824	CG10069
XLOC_003826	ND	D	OK	58.2145	35.4072	-0.717335	-2.92112	5e-05	0.000273369	yes	XLOC_003826	CG42672
XLOC_003828	ND	D	OK	297.235	114.414	-1.37734	-4.37601	5e-05	0.000273369	yes	XLOC_003828	dom,snmRNA:184,snoRNA:Me28S-G2596
XLOC_003847	ND	D	OK	23.4212	15.7303	-0.574265	-2.58652	5e-05	0.000273369	yes	XLOC_003847	Sara
XLOC_003852	ND	D	OK	46.2989	23.4946	-0.978647	-4.33327	5e-05	0.000273369	yes	XLOC_003852	CG10080
XLOC_003854	ND	D	OK	25.1207	16.9933	-0.56391	-2.51559	5e-05	0.000273369	yes	XLOC_003854	CG10321
XLOC_003859	ND	D	OK	37.4053	25.4662	-0.554661	-2.28053	5e-05	0.000273369	yes	XLOC_003859	NC2alpha
XLOC_003867	ND	D	OK	57.6407	23.3352	-1.30458	-5.76941	5e-05	0.000273369	yes	XLOC_003867	LBR
XLOC_003881	ND	D	OK	53.4662	42.351	-0.336233	-1.5059	0.0084	0.0259418	yes	XLOC_003881	CG42257
XLOC_003882	ND	D	OK	28.2858	17.6807	-0.677901	-2.72407	5e-05	0.000273369	yes	XLOC_003882	GlcT-1
XLOC_003883	ND	D	OK	28.3087	16.5219	-0.776866	-3.49315	5e-05	0.000273369	yes	XLOC_003883	synj
XLOC_003888	ND	D	OK	9.80565	14.7112	0.585229	2.07181	0.00035	0.00161865	yes	XLOC_003888	NtR
XLOC_003889	ND	D	OK	18.2088	8.72898	-1.06075	-3.79055	5e-05	0.000273369	yes	XLOC_003889	a
XLOC_003892	ND	D	OK	15.4088	11.2815	-0.44979	-1.77168	0.00195	0.00740708	yes	XLOC_003892	CG6758
XLOC_003898	ND	D	OK	24.0187	16.1563	-0.572061	-2.52806	5e-05	0.000273369	yes	XLOC_003898	ari-2
XLOC_003900	ND	D	OK	13.2019	16.9718	0.362399	1.54754	0.0077	0.0241103	yes	XLOC_003900	CG5819
XLOC_003902	ND	D	OK	552.803	369.71	-0.580371	-2.4699	5e-05	0.000273369	yes	XLOC_003902	pgc
XLOC_003905	ND	D	OK	39.2275	27.0901	-0.5341	-2.40462	5e-05	0.000273369	yes	XLOC_003905	Rtf1
XLOC_003907	ND	D	OK	20.1574	35.4999	0.816502	3.66258	5e-05	0.000273369	yes	XLOC_003907	CG13506
XLOC_003912	ND	D	OK	26.6585	15.1891	-0.811561	-3.64966	5e-05	0.000273369	yes	XLOC_003912	rad50
XLOC_003916	ND	D	OK	37.8635	15.4325	-1.29484	-5.55344	5e-05	0.000273369	yes	XLOC_003916	CG4554
XLOC_003921	ND	D	OK	2.45413	10.4363	2.08833	3.04074	0.0002	0.000976131	yes	XLOC_003921	CG4269
XLOC_003932	ND	D	OK	87.3506	175.392	1.0057	4.38781	5e-05	0.000273369	yes	XLOC_003932	CG13510
XLOC_003934	ND	D	OK	27.6632	38.6249	0.481562	1.54093	0.00855	0.0263649	yes	XLOC_003934	CG42565
XLOC_003936	ND	D	OK	105.303	154.43	0.552402	2.41649	0.0001	0.000521172	yes	XLOC_003936	CG4250
XLOC_003937	ND	D	OK	20.8138	34.6789	0.736516	2.14063	0.0003	0.00140992	yes	XLOC_003937	CG30269,CG30273
XLOC_003938	ND	D	OK	9.37932	17.9308	0.934882	2.75032	5e-05	0.000273369	yes	XLOC_003938	CG13516
XLOC_003952	ND	D	OK	1.70738	0.68712	-1.31315	-1.72254	0.0075	0.0236007	yes	XLOC_003952	CG30272
XLOC_003955	ND	D	OK	1.61157	4.91088	1.60752	3.01646	5e-05	0.000273369	yes	XLOC_003955	CG9825
XLOC_003986	ND	D	OK	59.9209	129.05	1.1068	2.15201	5e-05	0.000273369	yes	XLOC_003986	CG34423,CG34424,CG9875
XLOC_003987	ND	D	OK	31.3573	15.2973	-1.03552	-2.92848	5e-05	0.000273369	yes	XLOC_003987	CG13550
XLOC_003996	ND	D	OK	36.6549	20.1657	-0.862101	-3.56007	5e-05	0.000273369	yes	XLOC_003996	CG5360
XLOC_003999	ND	D	OK	554.474	747.783	0.431499	1.45583	0.01165	0.0344775	yes	XLOC_003999	levy
XLOC_004003	ND	D	OK	49.7678	34.7546	-0.518009	-2.31344	5e-05	0.000273369	yes	XLOC_004003	apt
XLOC_004005	ND	D	OK	92.4265	35.5941	-1.37667	-5.86539	5e-05	0.000273369	yes	XLOC_004005	retn
XLOC_004009	ND	D	OK	8.65416	16.8491	0.961206	1.69533	0.0053	0.017509	yes	XLOC_004009	CG5431
XLOC_004011	ND	D	OK	10.4677	13.3893	0.355142	1.34363	0.01785	0.0497075	yes	XLOC_004011	Pal
XLOC_004014	ND	D	OK	33.0646	16.7955	-0.977211	-4.31359	5e-05	0.000273369	yes	XLOC_004014	l(2)dtl
XLOC_004026	ND	D	OK	9.72609	16.8676	0.794324	2.95381	5e-05	0.000273369	yes	XLOC_004026	gbb
XLOC_004028	ND	D	OK	24.0008	18.4144	-0.382246	-1.71322	0.0026	0.00956445	yes	XLOC_004028	ken
XLOC_004030	ND	D	OK	39.266	62.4944	0.670444	2.89195	5e-05	0.000273369	yes	XLOC_004030	CG5597
XLOC_004031	ND	D	OK	27.0597	18.3325	-0.561743	-2.12	0.00015	0.000751259	yes	XLOC_004031	CG5602
XLOC_004033	ND	D	OK	17.4039	8.73379	-0.994731	-4.33812	5e-05	0.000273369	yes	XLOC_004033	CG5591
XLOC_004038	ND	D	OK	17.9722	30.7847	0.776447	3.22594	5e-05	0.000273369	yes	XLOC_004038	G-salpha60A
XLOC_004046	ND	D	OK	9.0113	11.4086	0.340308	1.39691	0.0159	0.0450189	yes	XLOC_004046	Sox14
XLOC_004050	ND	D	OK	11.1681	16.4961	0.562739	2.02609	0.0007	0.00300059	yes	XLOC_004050	CG11388
XLOC_004052	ND	D	OK	885.591	1557.35	0.814377	3.3281	5e-05	0.000273369	yes	XLOC_004052	PebIII
XLOC_004054	ND	D	OK	63.0427	46.1958	-0.448567	-2.04501	0.0003	0.00140992	yes	XLOC_004054	MAN1
XLOC_004055	ND	D	OK	37.8688	16.1083	-1.2332	-1.77419	0.00625	0.0202129	yes	XLOC_004055	CG3173
XLOC_004061	ND	D	OK	51.198	66.467	0.376551	1.69397	0.00375	0.0131147	yes	XLOC_004061	CG3209
XLOC_004062	ND	D	OK	334.536	543.71	0.700675	2.99134	5e-05	0.000273369	yes	XLOC_004062	Mlp60A
XLOC_004065	ND	D	OK	28.5467	18.566	-0.620664	-2.8045	5e-05	0.000273369	yes	XLOC_004065	snama
XLOC_004066	ND	D	OK	39.5502	15.7889	-1.32477	-5.67588	5e-05	0.000273369	yes	XLOC_004066	enok
XLOC_004067	ND	D	OK	0.326437	0.967754	1.56784	1.69734	0.01105	0.0329228	yes	XLOC_004067	CG3253
XLOC_004071	ND	D	OK	27.2642	20.175	-0.434444	-1.86797	0.0015	0.00588283	yes	XLOC_004071	spag
XLOC_004075	ND	D	OK	38.3221	14.3293	-1.41921	-6.17895	5e-05	0.000273369	yes	XLOC_004075	CG3363
XLOC_004077	ND	D	OK	32.436	24.6739	-0.394607	-1.77814	0.00205	0.00773766	yes	XLOC_004077	CG3356
XLOC_004081	ND	D	OK	0.82209	1.475	0.843342	1.69646	0.0042	0.0144199	yes	XLOC_004081	nvy
XLOC_004082	ND	D	OK	25.0618	19.0493	-0.395753	-1.69831	0.00365	0.0128402	yes	XLOC_004082	CG3394
XLOC_004083	ND	D	OK	21.5574	36.1997	0.747794	3.3629	5e-05	0.000273369	yes	XLOC_004083	betaTub60D
XLOC_004084	ND	D	OK	21.6898	14.3518	-0.595789	-2.51532	5e-05	0.000273369	yes	XLOC_004084	bs
XLOC_004088	ND	D	OK	15.9695	9.1667	-0.80084	-3.16065	5e-05	0.000273369	yes	XLOC_004088	CG3419
XLOC_004100	ND	D	OK	14.662	9.47957	-0.629192	-2.64999	5e-05	0.000273369	yes	XLOC_004100	Brca2
XLOC_004108	ND	D	OK	12.7617	16.7563	0.392891	1.6176	0.00595	0.0193724	yes	XLOC_004108	pio
XLOC_004110	ND	D	OK	21.2863	13.6182	-0.644386	-2.70646	5e-05	0.000273369	yes	XLOC_004110	CG3548
XLOC_004116	ND	D	OK	7.57631	11.524	0.605069	1.88377	0.00165	0.00640425	yes	XLOC_004116	Cyp9c1
XLOC_004121	ND	D	OK	29.1645	15.2163	-0.938596	-4.16061	5e-05	0.000273369	yes	XLOC_004121	CG30421
XLOC_004139	ND	D	OK	13.9576	25.563	0.873009	3.83761	5e-05	0.000273369	yes	XLOC_004139	CG3829
XLOC_004141	ND	D	OK	11.2727	16.9467	0.588172	2.20898	0.0003	0.00140992	yes	XLOC_004141	Nplp1
XLOC_004152	ND	D	OK	59.847	44.1786	-0.437932	-1.9665	0.00045	0.00203564	yes	XLOC_004152	CG17665
XLOC_004156	ND	D	OK	97.3953	54.1279	-0.84748	-3.52893	5e-05	0.000273369	yes	XLOC_004156	Nipped-B
XLOC_004160	ND	D	OK	32.3239	44.1886	0.451074	1.63415	0.00435	0.0148444	yes	XLOC_004160	TpnC41C
XLOC_004162	ND	D	OK	67.4638	32.39	-1.05857	-4.33877	5e-05	0.000273369	yes	XLOC_004162	Nipped-A
XLOC_004166	ND	D	OK	23.1573	16.3465	-0.502485	-2.28113	0.0002	0.000976131	yes	XLOC_004166	CG30440
XLOC_004171	ND	D	OK	3.65951	5.03528	0.460421	1.42739	0.01285	0.0375359	yes	XLOC_004171	scarface
XLOC_004174	ND	D	OK	12.6177	17.5971	0.479893	1.90547	0.00075	0.0031853	yes	XLOC_004174	CG11163
XLOC_004178	ND	D	OK	23.4221	13.7546	-0.767954	-3.45137	5e-05	0.000273369	yes	XLOC_004178	BubR1
XLOC_004179	ND	D	OK	20.9019	15.9449	-0.390537	-1.7122	0.00255	0.00939757	yes	XLOC_004179	mle
XLOC_004182	ND	D	OK	32.5771	19.5553	-0.736301	-3.30398	5e-05	0.000273369	yes	XLOC_004182	SCAP
XLOC_004184	ND	D	OK	2092.77	2720.29	0.378345	1.4664	0.0116	0.0343696	yes	XLOC_004184	CG34212
XLOC_004188	ND	D	OK	64.6415	42.4072	-0.608153	-2.67844	5e-05	0.000273369	yes	XLOC_004188	CG7843
XLOC_004189	ND	D	OK	28.6222	16.9442	-0.756339	-3.34397	5e-05	0.000273369	yes	XLOC_004189	EcR
XLOC_004198	ND	D	OK	16.457	9.51129	-0.790985	-1.73878	0.0026	0.00956445	yes	XLOC_004198	CG11211
XLOC_004209	ND	D	OK	35.299	51.9839	0.558436	2.49028	5e-05	0.000273369	yes	XLOC_004209	Fmo-2
XLOC_004210	ND	D	OK	152.575	109.097	-0.483907	-2.18621	0.0001	0.000521172	yes	XLOC_004210	geminin
XLOC_004217	ND	D	OK	52.4406	32.0431	-0.710668	-2.41822	5e-05	0.000273369	yes	XLOC_004217	CG3409
XLOC_004222	ND	D	OK	30.8274	38.7706	0.330749	1.39297	0.01645	0.0463176	yes	XLOC_004222	CG9436
XLOC_004224	ND	D	OK	46.1705	69.7365	0.594942	2.32889	5e-05	0.000273369	yes	XLOC_004224	Cyp6a2
XLOC_004227	ND	D	OK	36.1463	63.3795	0.810168	1.71357	0.00735	0.0232441	yes	XLOC_004227	CG34215
XLOC_004231	ND	D	OK	38.6397	55.8688	0.53196	2.33099	5e-05	0.000273369	yes	XLOC_004231	Spn4
XLOC_004233	ND	D	OK	92.8202	32.6661	-1.50664	-5.81338	5e-05	0.000273369	yes	XLOC_004233	CG33558
XLOC_004241	ND	D	OK	21.487	13.895	-0.628893	-2.7458	5e-05	0.000273369	yes	XLOC_004241	vimar
XLOC_004243	ND	D	OK	74.0577	159.113	1.10333	4.86529	5e-05	0.000273369	yes	XLOC_004243	Tsp42Ed
XLOC_004247	ND	D	OK	20.8193	29.4761	0.501622	1.80343	0.0017	0.00657066	yes	XLOC_004247	Tsp42Eq
XLOC_004251	ND	D	OK	3.31951	7.93095	1.25652	2.95682	5e-05	0.000273369	yes	XLOC_004251	Cyp9b1
XLOC_004252	ND	D	OK	41.6482	80.1803	0.944995	4.23489	5e-05	0.000273369	yes	XLOC_004252	Cyp9b2
XLOC_004254	ND	D	OK	91.2589	151.815	0.734273	2.50351	5e-05	0.000273369	yes	XLOC_004254	Spn43Ab,Spn43Ad
XLOC_004255	ND	D	OK	36.8665	63.9789	0.795287	1.94862	0.00105	0.00429572	yes	XLOC_004255	nec
XLOC_004259	ND	D	OK	59.3946	22.5627	-1.39639	-6.04655	5e-05	0.000273369	yes	XLOC_004259	CG1845
XLOC_004260	ND	D	OK	4.72587	3.36939	-0.488091	-1.94001	0.00015	0.000751259	yes	XLOC_004260	Dscam
XLOC_004261	ND	D	OK	25.8365	13.0436	-0.98607	-4.42575	5e-05	0.000273369	yes	XLOC_004261	cos
XLOC_004264	ND	D	OK	36.6901	27.468	-0.417637	-1.86701	0.00105	0.00429572	yes	XLOC_004264	Eaf
XLOC_004268	ND	D	OK	8.13733	13.0658	0.683168	1.59628	0.0056	0.0183803	yes	XLOC_004268	CG30502
XLOC_004269	ND	D	OK	81.0277	113.678	0.48847	2.18657	0.0001	0.000521172	yes	XLOC_004269	Inos
XLOC_004273	ND	D	OK	109.726	53.6616	-1.03194	-4.36127	5e-05	0.000273369	yes	XLOC_004273	wech
XLOC_004275	ND	D	OK	54.8476	41.4984	-0.402372	-1.82122	0.0014	0.00553775	yes	XLOC_004275	CG1620
XLOC_004276	ND	D	OK	67.0914	41.8239	-0.681801	-3.04348	5e-05	0.000273369	yes	XLOC_004276	dpa
XLOC_004278	ND	D	OK	12.7333	9.35413	-0.444934	-1.63471	0.0046	0.0155614	yes	XLOC_004278	az2
XLOC_004281	ND	D	OK	55.3897	22.5834	-1.29436	-4.88323	5e-05	0.000273369	yes	XLOC_004281	Orc1
XLOC_004282	ND	D	OK	61.6168	116.262	0.915986	4.09109	5e-05	0.000273369	yes	XLOC_004282	CG1600
XLOC_004295	ND	D	OK	34.4784	23.794	-0.535095	-2.3135	5e-05	0.000273369	yes	XLOC_004295	CG1399
XLOC_004296	ND	D	OK	26.7614	17.8527	-0.584013	-1.93425	0.0014	0.00553775	yes	XLOC_004296	tor
XLOC_004299	ND	D	OK	234.565	100.546	-1.22213	-4.57883	5e-05	0.000273369	yes	XLOC_004299	CG30497
XLOC_004304	ND	D	OK	342.545	440.544	0.362993	1.51965	0.0094	0.0285947	yes	XLOC_004304	cathD
XLOC_004308	ND	D	OK	3.29279	2.28151	-0.529321	-1.46039	0.01145	0.0339748	yes	XLOC_004308	Dgk
XLOC_004311	ND	D	OK	27.62	18.4057	-0.585563	-2.5053	5e-05	0.000273369	yes	XLOC_004311	Kdm4A
XLOC_004321	ND	D	OK	239.001	160.43	-0.57507	-2.06638	0.0003	0.00140992	yes	XLOC_004321	CG11198
XLOC_004324	ND	D	OK	1.77148	3.67364	1.05226	2.03733	0.00135	0.00535669	yes	XLOC_004324	CG11191
XLOC_004325	ND	D	OK	18.9372	25.3058	0.418246	1.87311	0.00115	0.00464858	yes	XLOC_004325	CG14762
XLOC_004327	ND	D	OK	11.928	7.06332	-0.755931	-1.53295	0.00745	0.0234798	yes	XLOC_004327	CG17977
XLOC_004330	ND	D	OK	17.2503	12.2379	-0.495273	-1.59663	0.0063	0.0203421	yes	XLOC_004330	CG8712
XLOC_004332	ND	D	OK	37.0267	21.419	-0.789676	-3.49462	5e-05	0.000273369	yes	XLOC_004332	CG30372
XLOC_004342	ND	D	OK	78.7321	109.991	0.482361	2.02263	0.0005	0.00222999	yes	XLOC_004342	CG14757
XLOC_004343	ND	D	OK	0.262798	2.58416	3.29767	2.80621	0.00195	0.00740708	yes	XLOC_004343	CG14756
XLOC_004355	ND	D	OK	1.71559	0.434237	-1.98215	-2.02404	0.0043	0.0146986	yes	XLOC_004355	boly
XLOC_004362	ND	D	OK	8.36871	16.6917	0.996053	3.30887	5e-05	0.000273369	yes	XLOC_004362	Cyp4ad1
XLOC_004363	ND	D	OK	203.556	272.401	0.420306	1.717	0.00275	0.0100398	yes	XLOC_004363	LvpH
XLOC_004364	ND	D	OK	15.6546	24.7728	0.662169	2.68821	5e-05	0.000273369	yes	XLOC_004364	LvpL
XLOC_004367	ND	D	OK	85.657	177.312	1.04965	3.24214	5e-05	0.000273369	yes	XLOC_004367	CG12780
XLOC_004368	ND	D	OK	6.74994	12.61	0.901624	2.88305	5e-05	0.000273369	yes	XLOC_004368	Cyp6a14
XLOC_004370	ND	D	OK	1.21833	3.37433	1.4697	1.83894	0.00465	0.0156939	yes	XLOC_004370	CG8736
XLOC_004371	ND	D	OK	55.7619	43.1646	-0.369432	-1.63672	0.005	0.0166645	yes	XLOC_004371	CG8735
XLOC_004376	ND	D	OK	29.4042	42.699	0.53818	2.34302	0.00015	0.000751259	yes	XLOC_004376	CG8586
XLOC_004380	ND	D	OK	79.1798	101.747	0.361782	1.58824	0.0062	0.0201024	yes	XLOC_004380	CG14767
XLOC_004384	ND	D	OK	29.0138	16.9639	-0.774276	-1.43923	0.0154	0.0438481	yes	XLOC_004384	ana2
XLOC_004389	ND	D	OK	16.8307	7.14848	-1.23539	-1.57468	0.0115	0.0341132	yes	XLOC_004389	CG34219,CG8247,CG8248
XLOC_004400	ND	D	OK	8.23911	11.5943	0.492855	1.72165	0.00305	0.0109692	yes	XLOC_004400	Ance-4
XLOC_004407	ND	D	OK	40.3754	31.5695	-0.354946	-1.60448	0.00545	0.0179577	yes	XLOC_004407	Pmm45A
XLOC_004412	ND	D	OK	13.0416	16.9308	0.376536	1.52575	0.00835	0.0258031	yes	XLOC_004412	CG8008
XLOC_004415	ND	D	OK	51.474	26.1686	-0.976009	-4.17191	5e-05	0.000273369	yes	XLOC_004415	Rme-8
XLOC_004418	ND	D	OK	17.6219	13.4888	-0.385608	-1.58762	0.00575	0.0188057	yes	XLOC_004418	CG8027
XLOC_004420	ND	D	OK	55.5447	36.7951	-0.594134	-2.4588	5e-05	0.000273369	yes	XLOC_004420	Pkn
XLOC_004423	ND	D	OK	24.3363	16.4249	-0.56722	-2.00537	0.00035	0.00161865	yes	XLOC_004423	TXBP181-like
XLOC_004425	ND	D	OK	1.91516	0.927221	-1.04648	-2.51028	0.0001	0.000521172	yes	XLOC_004425	CG13739
XLOC_004427	ND	D	OK	0.89859	0.447471	-1.00587	-1.39939	0.0156	0.044318	yes	XLOC_004427	CG13954
XLOC_004437	ND	D	OK	236.192	101.646	-1.21641	-4.2217	5e-05	0.000273369	yes	XLOC_004437	Not1
XLOC_004443	ND	D	OK	7.87734	14.2321	0.853372	1.53573	0.01125	0.0334499	yes	XLOC_004443	CG12926
XLOC_004446	ND	D	OK	185.072	124.749	-0.569055	-2.27011	0.0001	0.000521172	yes	XLOC_004446	Uba1
XLOC_004447	ND	D	OK	15.2357	20.0868	0.398794	1.62338	0.00515	0.0170802	yes	XLOC_004447	CG42347
XLOC_004450	ND	D	OK	432.32	932.404	1.10885	4.57728	5e-05	0.000273369	yes	XLOC_004450	CG1648
XLOC_004451	ND	D	OK	8.68946	5.89759	-0.559141	-1.44024	0.0141	0.0405565	yes	XLOC_004451	CG1625,CG30001
XLOC_004452	ND	D	OK	26.0034	44.6643	0.78042	3.45554	5e-05	0.000273369	yes	XLOC_004452	hebe
XLOC_004455	ND	D	OK	25.1238	16.5367	-0.60338	-1.43681	0.01545	0.0439411	yes	XLOC_004455	Orc6
XLOC_004457	ND	D	OK	101.045	74.8124	-0.433652	-1.68282	0.0035	0.0123856	yes	XLOC_004457	CG1516
XLOC_004459	ND	D	OK	54.281	28.9304	-0.90786	-3.62444	5e-05	0.000273369	yes	XLOC_004459	sec24
XLOC_004461	ND	D	OK	5.12249	7.42657	0.535851	1.61229	0.00525	0.0173664	yes	XLOC_004461	CG1441
XLOC_004483	ND	D	OK	148.779	192.475	0.371496	1.66088	0.0039	0.0135598	yes	XLOC_004483	Syb
XLOC_004488	ND	D	OK	14.3619	6.20777	-1.2101	-4.94336	5e-05	0.000273369	yes	XLOC_004488	CG34363
XLOC_004496	ND	D	OK	21.8285	9.71804	-1.16747	-2.64757	5e-05	0.000273369	yes	XLOC_004496	CG12897
XLOC_004497	ND	D	OK	52.5908	37.5505	-0.485978	-1.55497	0.0074	0.0233658	yes	XLOC_004497	CG11825
XLOC_004501	ND	D	OK	40.391	24.8746	-0.699363	-3.10387	5e-05	0.000273369	yes	XLOC_004501	Caf1-105
XLOC_004502	ND	D	OK	97.9665	130.596	0.414755	1.71123	0.0028	0.010204	yes	XLOC_004502	CPTI
XLOC_004504	ND	D	OK	398.611	224.393	-0.828956	-3.07443	5e-05	0.000273369	yes	XLOC_004504	lola
XLOC_004506	ND	D	OK	3.94018	5.46765	0.472661	1.6756	0.00395	0.0136914	yes	XLOC_004506	Rab3
XLOC_004509	ND	D	OK	20.7241	16.6012	-0.320024	-1.44551	0.0123	0.0361794	yes	XLOC_004509	CG33144
XLOC_004510	ND	D	OK	32.7339	16.6335	-0.976697	-4.35751	5e-05	0.000273369	yes	XLOC_004510	CG12340
XLOC_004513	ND	D	OK	8.02741	5.42439	-0.565475	-2.12228	0.0003	0.00140992	yes	XLOC_004513	dgo
XLOC_004514	ND	D	OK	39.5668	26.7564	-0.564407	-1.49472	0.0109	0.0325524	yes	XLOC_004514	Lsm10
XLOC_004520	ND	D	OK	20.7885	15.7646	-0.3991	-1.67715	0.0034	0.0120823	yes	XLOC_004520	Taf5
XLOC_004530	ND	D	OK	39.1294	27.7058	-0.498067	-2.22722	5e-05	0.000273369	yes	XLOC_004530	CG12391
XLOC_004537	ND	D	OK	6.41603	20.0832	1.64623	3.52281	5e-05	0.000273369	yes	XLOC_004537	CG13215
XLOC_004538	ND	D	OK	17.5209	31.5573	0.848895	1.97528	0.00115	0.00464858	yes	XLOC_004538	CG9080
XLOC_004543	ND	D	OK	13.5511	24.0188	0.825755	2.25314	0.0003	0.00140992	yes	XLOC_004543	TpnC47D
XLOC_004546	ND	D	OK	30.2717	23.2142	-0.382966	-1.6402	0.005	0.0166645	yes	XLOC_004546	CG9062
XLOC_004553	ND	D	OK	35.898	53.7524	0.582426	2.35517	5e-05	0.000273369	yes	XLOC_004553	kappaTry
XLOC_004554	ND	D	OK	20.0798	28.1244	0.486078	1.69194	0.0032	0.0114397	yes	XLOC_004554	zetaTry
XLOC_004555	ND	D	OK	12.4017	17.5797	0.503372	1.46021	0.0122	0.0359478	yes	XLOC_004555	etaTry
XLOC_004556	ND	D	OK	88.8793	125.623	0.499186	2.24419	0.0001	0.000521172	yes	XLOC_004556	thetaTry
XLOC_004557	ND	D	OK	2614.17	3811.03	0.543826	1.98551	0.00055	0.00242421	yes	XLOC_004557	alphaTry
XLOC_004558	ND	D	OK	109.502	182.626	0.73793	3.31792	5e-05	0.000273369	yes	XLOC_004558	epsilonTry
XLOC_004569	ND	D	OK	27.1564	36.17	0.413498	1.45887	0.0097	0.0293752	yes	XLOC_004569	CG30022
XLOC_004571	ND	D	OK	11.9494	24.359	1.02751	3.39391	5e-05	0.000273369	yes	XLOC_004571	CG30026
XLOC_004572	ND	D	OK	5.94944	12.5567	1.07763	2.18824	0.0006	0.00262067	yes	XLOC_004572	CG34054
XLOC_004576	ND	D	OK	62.6163	23.4784	-1.4152	-5.00865	5e-05	0.000273369	yes	XLOC_004576	tou
XLOC_004579	ND	D	OK	15.7124	20.4189	0.378	1.54965	0.007	0.0222691	yes	XLOC_004579	Egm
XLOC_004580	ND	D	OK	75.0167	29.0246	-1.36994	-5.86843	5e-05	0.000273369	yes	XLOC_004580	CG9005
XLOC_004593	ND	D	OK	23.3684	55.7467	1.25432	4.73232	5e-05	0.000273369	yes	XLOC_004593	Damm
XLOC_004594	ND	D	OK	51.188	21.5213	-1.25004	-4.83791	5e-05	0.000273369	yes	XLOC_004594	CG13185
XLOC_004596	ND	D	OK	36.4042	22.7912	-0.675631	-2.43962	5e-05	0.000273369	yes	XLOC_004596	MCPH1
XLOC_004602	ND	D	OK	181.305	134.871	-0.426839	-1.86386	0.00105	0.00429572	yes	XLOC_004602	RnrS
XLOC_004606	ND	D	OK	32.9107	25.7859	-0.351971	-1.43934	0.0133	0.038639	yes	XLOC_004606	CG8889
XLOC_004608	ND	D	OK	4.99129	8.86561	0.828807	2.33031	0.00015	0.000751259	yes	XLOC_004608	CG8888
XLOC_004609	ND	D	OK	2.18215	1.17092	-0.898106	-2.31504	0.00025	0.00119769	yes	XLOC_004609	jeb
XLOC_004612	ND	D	OK	33.0014	18.6582	-0.822718	-3.38266	5e-05	0.000273369	yes	XLOC_004612	CG8878
XLOC_004613	ND	D	OK	113.097	45.4101	-1.31648	-5.2283	5e-05	0.000273369	yes	XLOC_004613	Prp8
XLOC_004614	ND	D	OK	29.6122	46.3575	0.646608	2.35198	0.0001	0.000521172	yes	XLOC_004614	CG34232
XLOC_004624	ND	D	OK	22.5165	13.0206	-0.790184	-3.55678	5e-05	0.000273369	yes	XLOC_004624	CG8858
XLOC_004632	ND	D	OK	26.2323	18.0359	-0.540476	-2.08539	0.00025	0.00119769	yes	XLOC_004632	CG8841
XLOC_004636	ND	D	OK	57.8741	74.4312	0.36299	1.63747	0.0043	0.0146986	yes	XLOC_004636	CG8839
XLOC_004639	ND	D	OK	42.4751	79.5937	0.906037	4.0418	5e-05	0.000273369	yes	XLOC_004639	CG8834
XLOC_004642	ND	D	OK	26.1541	17.9094	-0.546324	-2.28104	0.00015	0.000751259	yes	XLOC_004642	CG8830
XLOC_004646	ND	D	OK	23.9047	15.972	-0.58175	-2.07904	0.00065	0.00281122	yes	XLOC_004646	fdl
XLOC_004652	ND	D	OK	184.194	71.3006	-1.36924	-4.63008	5e-05	0.000273369	yes	XLOC_004652	Sin3A
XLOC_004653	ND	D	OK	98.3147	64.8111	-0.601165	-2.66881	5e-05	0.000273369	yes	XLOC_004653	muskelin
XLOC_004655	ND	D	OK	7.00355	18.1425	1.37322	4.53054	5e-05	0.000273369	yes	XLOC_004655	CG8785
XLOC_004657	ND	D	OK	22.536	34.0463	0.595268	2.5039	5e-05	0.000273369	yes	XLOC_004657	CG8776
XLOC_004658	ND	D	OK	23.6356	46.4146	0.973617	4.32814	5e-05	0.000273369	yes	XLOC_004658	nemy
XLOC_004659	ND	D	OK	30.6058	15.597	-0.972538	-4.36068	5e-05	0.000273369	yes	XLOC_004659	CG8771
XLOC_004661	ND	D	OK	8.35249	12.6112	0.594422	1.42378	0.01545	0.0439411	yes	XLOC_004661	Obp49a
XLOC_004662	ND	D	OK	23.2989	35.2109	0.595762	2.3123	0.0001	0.000521172	yes	XLOC_004662	CG8768
XLOC_004667	ND	D	OK	6.16356	9.83271	0.673826	1.98689	0.0008	0.00337364	yes	XLOC_004667	Cyp9h1
XLOC_004669	ND	D	OK	2.05194	4.9352	1.26612	1.88871	0.00055	0.00242421	yes	XLOC_004669	CG30486,CG30488
XLOC_004670	ND	D	OK	94.7438	154.038	0.701183	3.13051	5e-05	0.000273369	yes	XLOC_004670	CG17574
XLOC_004672	ND	D	OK	28.679	45.7348	0.673298	2.51534	5e-05	0.000273369	yes	XLOC_004672	CG3814
XLOC_004673	ND	D	OK	90.4303	128.85	0.510817	2.26097	5e-05	0.000273369	yes	XLOC_004673	Nmda1
XLOC_004678	ND	D	OK	56.6386	96.4513	0.768015	3.35099	5e-05	0.000273369	yes	XLOC_004678	CG3884
XLOC_004679	ND	D	OK	22.6355	7.73421	-1.54926	-6.6328	5e-05	0.000273369	yes	XLOC_004679	Psc
XLOC_004680	ND	D	OK	158.123	439.083	1.47345	6.35323	5e-05	0.000273369	yes	XLOC_004680	CG13323
XLOC_004681	ND	D	OK	14.9875	57.9334	1.95063	5.1896	5e-05	0.000273369	yes	XLOC_004681	CG13324
XLOC_004685	ND	D	OK	28.642	18.8225	-0.605672	-2.6581	5e-05	0.000273369	yes	XLOC_004685	PR2
XLOC_004687	ND	D	OK	80.4167	53.6443	-0.584071	-2.08804	0.00025	0.00119769	yes	XLOC_004687	TppII
XLOC_004690	ND	D	OK	65.6985	28.4916	-1.20532	-4.46838	5e-05	0.000273369	yes	XLOC_004690	CG17724,Kdm4B,seq
XLOC_004691	ND	D	OK	14.7681	11.3578	-0.378792	-1.55595	0.0072	0.0228195	yes	XLOC_004691	lat
XLOC_004693	ND	D	OK	11.5905	18.2259	0.653045	2.12146	0.0002	0.000976131	yes	XLOC_004693	AQP
XLOC_004698	ND	D	OK	36.6459	48.4725	0.403515	1.8262	0.00185	0.00708026	yes	XLOC_004698	CG4670
XLOC_004703	ND	D	OK	31.2004	45.3741	0.540306	2.12056	0.00035	0.00161865	yes	XLOC_004703	CG4734
XLOC_004707	ND	D	OK	1.51698	16.3153	3.42695	6.90005	5e-05	0.000273369	yes	XLOC_004707	CG10814
XLOC_004711	ND	D	OK	5.66135	3.63234	-0.640249	-1.68952	0.00365	0.0128402	yes	XLOC_004711	CG18278
XLOC_004717	ND	D	OK	35.2453	20.468	-0.784059	-3.49199	5e-05	0.000273369	yes	XLOC_004717	cnn
XLOC_004719	ND	D	OK	16.9879	8.38794	-1.01812	-4.47478	5e-05	0.000273369	yes	XLOC_004719	arr
XLOC_004726	ND	D	OK	0	38.5203	Inf	NA	0.00025	0.00119769	yes	XLOC_004726	snoRNA:Psi28S-1153
XLOC_004727	ND	D	OK	48.2048	61.6524	0.354979	1.51609	0.00855	0.0263649	yes	XLOC_004727	CG13335
XLOC_004729	ND	D	OK	4.26992	10.8732	1.34849	2.41794	0.00035	0.00161865	yes	XLOC_004729	CG34236
XLOC_004739	ND	D	OK	50.2498	32.1589	-0.643898	-2.87614	5e-05	0.000273369	yes	XLOC_004739	tum
XLOC_004740	ND	D	OK	32.5637	46.4584	0.512676	1.68429	0.0045	0.0152792	yes	XLOC_004740	CG16935
XLOC_004741	ND	D	OK	91.3705	55.0362	-0.731349	-2.41095	5e-05	0.000273369	yes	XLOC_004741	shot
XLOC_004743	ND	D	OK	79.2361	39.3467	-1.00992	-3.6465	5e-05	0.000273369	yes	XLOC_004743	AGO1
XLOC_004745	ND	D	OK	6.46097	13.2291	1.03389	2.76293	5e-05	0.000273369	yes	XLOC_004745	CG6704
XLOC_004747	ND	D	OK	70.0182	41.7381	-0.746366	-3.25121	5e-05	0.000273369	yes	XLOC_004747	CG6701
XLOC_004748	ND	D	OK	17.4028	11.6653	-0.577093	-2.44065	0.0001	0.000521172	yes	XLOC_004748	CG13350
XLOC_004749	ND	D	OK	41.6646	30.3759	-0.455894	-1.82584	0.0021	0.00789993	yes	XLOC_004749	RN-tre
XLOC_004751	ND	D	OK	58.1572	22.4115	-1.37572	-5.64557	5e-05	0.000273369	yes	XLOC_004751	Prosap
XLOC_004752	ND	D	OK	44.0378	30.2246	-0.543018	-2.43229	5e-05	0.000273369	yes	XLOC_004752	Rcd1
XLOC_004764	ND	D	OK	25.3427	35.6278	0.491436	2.22313	5e-05	0.000273369	yes	XLOC_004764	CG8547
XLOC_004765	ND	D	OK	111.856	85.5963	-0.386015	-1.73623	0.0024	0.00889974	yes	XLOC_004765	SelD
XLOC_004767	ND	D	OK	22.1469	16.5291	-0.422099	-1.7234	0.0033	0.0117681	yes	XLOC_004767	CG8589
XLOC_004769	ND	D	OK	43.9379	195.058	2.15037	9.2493	5e-05	0.000273369	yes	XLOC_004769	Arc1
XLOC_004775	ND	D	OK	0.648919	1.56388	1.26902	1.94152	0.0025	0.00922335	yes	XLOC_004775	phyl
XLOC_004776	ND	D	OK	21.607	12.8391	-0.750952	-3.37039	5e-05	0.000273369	yes	XLOC_004776	Cpsf160
XLOC_004777	ND	D	OK	4.70848	14.5585	1.62853	1.54307	0.0131	0.0380907	yes	XLOC_004777	Cpr51A
XLOC_004779	ND	D	OK	25.4578	36.3711	0.514684	1.72234	0.00405	0.0140045	yes	XLOC_004779	LamC
XLOC_004780	ND	D	OK	35.1175	22.5021	-0.642131	-2.86299	5e-05	0.000273369	yes	XLOC_004780	RpI1
XLOC_004782	ND	D	OK	25.6906	44.5866	0.795369	2.82784	5e-05	0.000273369	yes	XLOC_004782	CG12868
XLOC_004783	ND	D	OK	1.54666	6.28555	2.02288	2.49679	0.00035	0.00161865	yes	XLOC_004783	CG33468,CG33469
XLOC_004784	ND	D	OK	53.2063	18.1818	-1.54911	-6.01423	5e-05	0.000273369	yes	XLOC_004784	Su(var)2-HP2
XLOC_004802	ND	D	OK	25.4413	38.0965	0.582489	2.5678	5e-05	0.000273369	yes	XLOC_004802	NaPi-T
XLOC_004804	ND	D	OK	21.0477	10.8766	-0.952438	-4.18982	5e-05	0.000273369	yes	XLOC_004804	SMC2
XLOC_004810	ND	D	OK	18.3426	38.4172	1.06656	4.37833	5e-05	0.000273369	yes	XLOC_004810	Cyp6a21
XLOC_004811	ND	D	OK	35.7395	61.6773	0.787219	3.5219	5e-05	0.000273369	yes	XLOC_004811	Cyp6a8
XLOC_004813	ND	D	OK	5.67517	8.73492	0.622131	2.05625	0.00035	0.00161865	yes	XLOC_004813	CG10253
XLOC_004818	ND	D	OK	16.5953	11.1884	-0.568778	-2.01412	0.00075	0.0031853	yes	XLOC_004818	CG10265
XLOC_004822	ND	D	OK	7.64334	4.554	-0.74707	-2.27806	0.00015	0.000751259	yes	XLOC_004822	CG8089
XLOC_004825	ND	D	OK	44.0533	28.8225	-0.612053	-2.52206	5e-05	0.000273369	yes	XLOC_004825	row
XLOC_004826	ND	D	OK	16.2559	23.0712	0.505131	1.74735	0.0019	0.00724974	yes	XLOC_004826	CG8093
XLOC_004828	ND	D	OK	31.3877	52.8901	0.752797	2.50189	0.0001	0.000521172	yes	XLOC_004828	Hex-C
XLOC_004830	ND	D	OK	38.3076	22.7441	-0.752138	-3.23189	5e-05	0.000273369	yes	XLOC_004830	CG34123
XLOC_004834	ND	D	OK	19.9815	13.3724	-0.579412	-2.56839	5e-05	0.000273369	yes	XLOC_004834	CG8155
XLOC_004837	ND	D	OK	14.1884	9.15708	-0.631756	-2.4552	5e-05	0.000273369	yes	XLOC_004837	Pms2
XLOC_004838	ND	D	OK	60.8817	37.9576	-0.681618	-1.52712	0.00865	0.0266247	yes	XLOC_004838	dup
XLOC_004841	ND	D	OK	166.289	96.2979	-0.788112	-3.3567	5e-05	0.000273369	yes	XLOC_004841	CG8180
XLOC_004843	ND	D	OK	44.1232	20.8569	-1.08101	-4.62207	5e-05	0.000273369	yes	XLOC_004843	Khc-73
XLOC_004847	ND	D	OK	20.5938	26.2155	0.348206	1.47839	0.011	0.0328027	yes	XLOC_004847	Flo
XLOC_004850	ND	D	OK	79.8924	61.0868	-0.387198	-1.61101	0.0049	0.016385	yes	XLOC_004850	fus
XLOC_004852	ND	D	OK	229.35	283.533	0.305966	1.37971	0.01695	0.0474619	yes	XLOC_004852	Vha14
XLOC_004860	ND	D	OK	4.57138	7.91476	0.791918	2.21647	0.00025	0.00119769	yes	XLOC_004860	CG8249
XLOC_004861	ND	D	OK	77.9604	135.679	0.799385	3.46838	5e-05	0.000273369	yes	XLOC_004861	Gpo-1
XLOC_004862	ND	D	OK	57.1592	18.7655	-1.6069	-7.0882	5e-05	0.000273369	yes	XLOC_004862	CG30085
XLOC_004865	ND	D	OK	15.5344	9.48173	-0.712248	-3.06886	5e-05	0.000273369	yes	XLOC_004865	bdg
XLOC_004880	ND	D	OK	38.5023	22.5689	-0.770607	-3.38256	5e-05	0.000273369	yes	XLOC_004880	Dg
XLOC_004881	ND	D	OK	29.4057	23.4928	-0.323878	-1.40402	0.017	0.0475887	yes	XLOC_004881	CG8414
XLOC_004885	ND	D	OK	23.5632	17.4784	-0.430961	-1.63569	0.00485	0.0162446	yes	XLOC_004885	CG8435
XLOC_004889	ND	D	OK	22.4419	17.8768	-0.328105	-1.45101	0.01395	0.0402277	yes	XLOC_004889	shark
XLOC_004896	ND	D	OK	37.8882	20.8063	-0.864725	-3.83549	5e-05	0.000273369	yes	XLOC_004896	krimp
XLOC_004907	ND	D	OK	9.23615	6.16713	-0.582692	-2.30492	0.00015	0.000751259	yes	XLOC_004907	CG8060
XLOC_004913	ND	D	OK	1.80436	8.80544	2.2869	3.4987	5e-05	0.000273369	yes	XLOC_004913	CG30098
XLOC_004921	ND	D	OK	79.0924	111.498	0.495407	2.22624	0.0001	0.000521172	yes	XLOC_004921	CG8317
XLOC_004923	ND	D	OK	18.0843	26.3561	0.543398	2.35016	5e-05	0.000273369	yes	XLOC_004923	CG8306
XLOC_004924	ND	D	OK	20.9483	34.8152	0.732883	3.11272	5e-05	0.000273369	yes	XLOC_004924	CG8303
XLOC_004925	ND	D	OK	5.53701	3.4441	-0.684981	-2.79433	5e-05	0.000273369	yes	XLOC_004925	Alk
XLOC_004927	ND	D	OK	0.276496	0.950301	1.78113	1.57085	0.0058	0.0189509	yes	XLOC_004927	Nach
XLOC_004928	ND	D	OK	89.426	165.638	0.889266	3.75006	5e-05	0.000273369	yes	XLOC_004928	Picot
XLOC_004937	ND	D	OK	148.37	184.579	0.315035	1.42357	0.0126	0.0369547	yes	XLOC_004937	Sod2
XLOC_004940	ND	D	OK	27.1521	19.5788	-0.471771	-1.45268	0.011	0.0328027	yes	XLOC_004940	Fen1
XLOC_004941	ND	D	OK	42.2437	28.2541	-0.580274	-2.60975	5e-05	0.000273369	yes	XLOC_004941	Psi
XLOC_004945	ND	D	OK	35.3824	16.853	-1.07003	-4.44139	5e-05	0.000273369	yes	XLOC_004945	CG34415
XLOC_004949	ND	D	OK	18.2629	13.4158	-0.444984	-1.38767	0.01545	0.0439411	yes	XLOC_004949	NiPp1
XLOC_004951	ND	D	OK	73.1557	56.1912	-0.380626	-1.69867	0.0033	0.0117681	yes	XLOC_004951	CG8963
XLOC_004954	ND	D	OK	6.77455	4.69568	-0.528792	-1.75899	0.002	0.00757148	yes	XLOC_004954	CG8950
XLOC_004956	ND	D	OK	60.1049	86.7935	0.530105	2.38815	5e-05	0.000273369	yes	XLOC_004956	Sply
XLOC_004958	ND	D	OK	75.9022	118.061	0.637325	2.89319	5e-05	0.000273369	yes	XLOC_004958	Amy-p
XLOC_004969	ND	D	OK	18.2837	14.0179	-0.383285	-1.5043	0.0086	0.0265029	yes	XLOC_004969	CG6568
XLOC_004970	ND	D	OK	0.477106	1.9571	2.03634	2.9883	0.0001	0.000521172	yes	XLOC_004970	CG30101
XLOC_004971	ND	D	OK	37.3922	16.1627	-1.21007	-5.33591	5e-05	0.000273369	yes	XLOC_004971	cnk
XLOC_004973	ND	D	OK	49.4186	39.5751	-0.320462	-1.4085	0.0134	0.0389072	yes	XLOC_004973	Bap55
XLOC_004975	ND	D	OK	2.83244	4.68669	0.726521	1.71849	0.004	0.0138457	yes	XLOC_004975	mthl4
XLOC_004978	ND	D	OK	14.149	9.92418	-0.511683	-2.08584	0.00035	0.00161865	yes	XLOC_004978	CG6522
XLOC_004982	ND	D	OK	52.1741	24.3448	-1.09972	-3.30561	5e-05	0.000273369	yes	XLOC_004982	ssp4
XLOC_004987	ND	D	OK	70.8771	90.4297	0.351478	1.58049	0.00565	0.0185264	yes	XLOC_004987	CG6484
XLOC_004989	ND	D	OK	15.9995	8.45017	-0.920976	-3.72484	5e-05	0.000273369	yes	XLOC_004989	RhoGAP54D
XLOC_004994	ND	D	OK	13.385	8.75387	-0.61263	-1.49127	0.01025	0.0308748	yes	XLOC_004994	rhi
XLOC_004999	ND	D	OK	8.37764	14.1615	0.757356	1.77547	0.0027	0.00987857	yes	XLOC_004999	swi2
XLOC_005002	ND	D	OK	24.9998	19.3005	-0.373278	-1.49566	0.00925	0.0282401	yes	XLOC_005002	CG6410
XLOC_005005	ND	D	OK	23.1315	13.8585	-0.739089	-3.12494	5e-05	0.000273369	yes	XLOC_005005	sub
XLOC_005006	ND	D	OK	2.03901	4.15188	1.0259	2.69642	0.0001	0.000521172	yes	XLOC_005006	CG6385
XLOC_005009	ND	D	OK	38.5038	19.2171	-1.00261	-4.29622	5e-05	0.000273369	yes	XLOC_005009	CG33981,fab1
XLOC_005012	ND	D	OK	26.7213	12.385	-1.1094	-4.84839	5e-05	0.000273369	yes	XLOC_005012	thr
XLOC_005021	ND	D	OK	16.1171	24.3462	0.595103	1.91632	0.00105	0.00429572	yes	XLOC_005021	CG5770
XLOC_005022	ND	D	OK	14.1832	35.4322	1.32088	4.28665	5e-05	0.000273369	yes	XLOC_005022	CG5767
XLOC_005023	ND	D	OK	6.55651	17.5334	1.4191	3.46365	5e-05	0.000273369	yes	XLOC_005023	CG14495
XLOC_005024	ND	D	OK	0.446052	2.07515	2.21793	2.82421	0.00025	0.00119769	yes	XLOC_005024	Muc55B
XLOC_005025	ND	D	OK	304.616	678.341	1.15502	4.67108	5e-05	0.000273369	yes	XLOC_005025	CG10911
XLOC_005026	ND	D	OK	72.2672	188.161	1.38056	5.99717	5e-05	0.000273369	yes	XLOC_005026	CG10912
XLOC_005029	ND	D	OK	83.2579	43.3082	-0.942946	-3.96796	5e-05	0.000273369	yes	XLOC_005029	stau
XLOC_005030	ND	D	OK	52.0511	37.7805	-0.462288	-2.08701	0.00065	0.00281122	yes	XLOC_005030	Hsf
XLOC_005036	ND	D	OK	38.6934	28.158	-0.458545	-2.06836	0.0002	0.000976131	yes	XLOC_005036	CG5726
XLOC_005039	ND	D	OK	98.4159	67.9858	-0.533658	-2.40939	5e-05	0.000273369	yes	XLOC_005039	Ote
XLOC_005040	ND	D	OK	110.485	41.4303	-1.41509	-4.89005	5e-05	0.000273369	yes	XLOC_005040	sbb
XLOC_005042	ND	D	OK	34.9126	91.388	1.38826	4.01943	5e-05	0.000273369	yes	XLOC_005042	IM23
XLOC_005043	ND	D	OK	494.532	1084.69	1.13315	4.87624	5e-05	0.000273369	yes	XLOC_005043	CG15067
XLOC_005044	ND	D	OK	4682.87	6848.06	0.548303	2.4524	5e-05	0.000273369	yes	XLOC_005044	CG15068
XLOC_005045	ND	D	OK	12.1967	21.4247	0.812781	2.11799	0.0007	0.00300059	yes	XLOC_005045	GstE10
XLOC_005050	ND	D	OK	4.2119	3.19892	-0.396887	-1.49152	0.01	0.0301845	yes	XLOC_005050	CG30116
XLOC_005051	ND	D	OK	10.9382	8.69598	-0.330957	-1.45485	0.0121	0.0356635	yes	XLOC_005051	CG30115
XLOC_005053	ND	D	OK	12.0039	23.2665	0.954749	1.99324	0.0014	0.00553775	yes	XLOC_005053	CG5493
XLOC_005056	ND	D	OK	117.748	63.9546	-0.880578	-3.47962	5e-05	0.000273369	yes	XLOC_005056	CG30122
XLOC_005061	ND	D	OK	2.65504	4.66541	0.813268	1.78942	0.0029	0.0105192	yes	XLOC_005061	edl
XLOC_005064	ND	D	OK	13.975	21.7686	0.639402	1.69869	0.0045	0.0152792	yes	XLOC_005064	CG15088
XLOC_005066	ND	D	OK	24.0299	41.3224	0.782093	1.7652	0.0022	0.00823336	yes	XLOC_005066	CG18609
XLOC_005070	ND	D	OK	13.7167	18.1223	0.401831	1.51732	0.0086	0.0265029	yes	XLOC_005070	CG15094
XLOC_005071	ND	D	OK	55.059	117.966	1.09932	4.88062	5e-05	0.000273369	yes	XLOC_005071	l(2)08717
XLOC_005072	ND	D	OK	41.9421	52.9074	0.33507	1.47954	0.0097	0.0293752	yes	XLOC_005072	CG15096
XLOC_005074	ND	D	OK	585.793	753.732	0.36366	1.52013	0.00885	0.0271743	yes	XLOC_005074	CG15098
XLOC_005075	ND	D	OK	50.3689	23.1389	-1.12221	-3.99442	5e-05	0.000273369	yes	XLOC_005075	CG15099
XLOC_005076	ND	D	OK	33.247	24.676	-0.430114	-1.94102	0.00095	0.00393422	yes	XLOC_005076	CG15100
XLOC_005077	ND	D	OK	121.923	95.1305	-0.357988	-1.55076	0.0061	0.0198226	yes	XLOC_005077	CG18190
XLOC_005078	ND	D	OK	54.0314	67.9675	0.331049	1.48938	0.00895	0.0274315	yes	XLOC_005078	Jheh1
XLOC_005080	ND	D	OK	37.0969	48.7788	0.394955	1.75252	0.00195	0.00740708	yes	XLOC_005080	Jheh3
XLOC_005083	ND	D	OK	28.5801	19.6926	-0.537356	-1.99399	0.0008	0.00337364	yes	XLOC_005083	CG15107
XLOC_005089	ND	D	OK	3.18645	7.32388	1.20066	3.46443	5e-05	0.000273369	yes	XLOC_005089	CG15117
XLOC_005100	ND	D	OK	7.65298	12.3233	0.687292	2.53123	5e-05	0.000273369	yes	XLOC_005100	CG9416
XLOC_005101	ND	D	OK	136.237	175.536	0.365642	1.54009	0.00755	0.0237212	yes	XLOC_005101	SdhA
XLOC_005102	ND	D	OK	157.603	257.424	0.707851	3.12946	5e-05	0.000273369	yes	XLOC_005102	cer
XLOC_005103	ND	D	OK	86.8671	65.8643	-0.399313	-1.58434	0.0066	0.0211894	yes	XLOC_005103	hts
XLOC_005105	ND	D	OK	22.282	16.5612	-0.428075	-1.91569	0.00055	0.00242421	yes	XLOC_005105	Fak56D
XLOC_005109	ND	D	OK	5.69232	3.93498	-0.532661	-1.89827	0.0012	0.00482187	yes	XLOC_005109	Oseg6
XLOC_005111	ND	D	OK	827.517	1746.54	1.07764	4.14509	5e-05	0.000273369	yes	XLOC_005111	CG16926
XLOC_005114	ND	D	OK	13.9728	10.7306	-0.380893	-1.42642	0.01285	0.0375359	yes	XLOC_005114	sm
XLOC_005128	ND	D	OK	15.727	32.565	1.05008	2.33396	0.0003	0.00140992	yes	XLOC_005128	CG34198
XLOC_005243	ND	D	OK	34.1776	25.9219	-0.398878	-1.62796	0.00415	0.0142821	yes	XLOC_005243	CG16898
XLOC_005249	ND	D	OK	213.053	171.15	-0.315949	-1.4003	0.014	0.0403146	yes	XLOC_005249	mus209
XLOC_005250	ND	D	OK	74.8923	50.8778	-0.557782	-2.15195	0.00025	0.00119769	yes	XLOC_005250	plu
XLOC_005253	ND	D	OK	46.9871	69.4976	0.5647	2.5054	5e-05	0.000273369	yes	XLOC_005253	CG9090
XLOC_005254	ND	D	OK	22.5258	11.3155	-0.993277	-4.41118	5e-05	0.000273369	yes	XLOC_005254	CG16868
XLOC_005256	ND	D	OK	204.688	378.723	0.887714	2.86646	5e-05	0.000273369	yes	XLOC_005256	CG11200,CG13868
XLOC_005258	ND	D	OK	1.35596	3.04752	1.16833	1.62209	0.0076	0.023834	yes	XLOC_005258	CG11192
XLOC_005260	ND	D	OK	12.0004	19.1029	0.670714	2.0865	0.0005	0.00222999	yes	XLOC_005260	CG30151
XLOC_005262	ND	D	OK	43.3674	69.56	0.681645	2.34279	5e-05	0.000273369	yes	XLOC_005262	CG13428
XLOC_005263	ND	D	OK	5.55374	10.359	0.899348	1.80519	0.00295	0.0106777	yes	XLOC_005263	CG30148
XLOC_005268	ND	D	OK	10.4514	14.2575	0.448022	1.64033	0.00455	0.0154232	yes	XLOC_005268	l(2)05510
XLOC_005274	ND	D	OK	4.32941	5.75215	0.40993	1.41563	0.01375	0.0397867	yes	XLOC_005274	Hil
XLOC_005277	ND	D	OK	53.9498	32.0752	-0.750161	-3.29747	5e-05	0.000273369	yes	XLOC_005277	rig
XLOC_005279	ND	D	OK	52.4905	105.418	1.006	4.00218	5e-05	0.000273369	yes	XLOC_005279	CG16799
XLOC_005288	ND	D	OK	53.5027	35.4941	-0.592035	-2.41468	0.0001	0.000521172	yes	XLOC_005288	sktl
XLOC_005289	ND	D	OK	0.797277	0.123035	-2.69601	-2.26536	0.01175	0.0347531	yes	XLOC_005289	CG17999
XLOC_005290	ND	D	OK	2.53634	1.47857	-0.778548	-1.48856	0.01295	0.0377519	yes	XLOC_005290	CG9993
XLOC_005291	ND	D	OK	1477.13	2371.66	0.6831	2.82609	5e-05	0.000273369	yes	XLOC_005291	IM4
XLOC_005298	ND	D	OK	13.0675	7.78612	-0.747004	-2.55932	5e-05	0.000273369	yes	XLOC_005298	dgt3
XLOC_005302	ND	D	OK	41.4658	20.1423	-1.04169	-4.58338	5e-05	0.000273369	yes	XLOC_005302	shg
XLOC_005305	ND	D	OK	3.80573	8.50262	1.15974	2.8169	5e-05	0.000273369	yes	XLOC_005305	Cht4
XLOC_005306	ND	D	OK	11.4536	39.0839	1.77077	6.10898	5e-05	0.000273369	yes	XLOC_005306	Cht9
XLOC_005307	ND	D	OK	103.7	168.157	0.697394	3.10978	5e-05	0.000273369	yes	XLOC_005307	CG10527
XLOC_005310	ND	D	OK	22.7208	16.1413	-0.493254	-2.17243	0.00015	0.000751259	yes	XLOC_005310	CG4050
XLOC_005311	ND	D	OK	20.3673	8.93244	-1.18913	-3.56806	5e-05	0.000273369	yes	XLOC_005311	Magi
XLOC_005313	ND	D	OK	42.4323	22.7477	-0.899442	-3.98838	5e-05	0.000273369	yes	XLOC_005313	CG30389
XLOC_005316	ND	D	OK	64.3303	27.6006	-1.2208	-5.3326	5e-05	0.000273369	yes	XLOC_005316	CG4266
XLOC_005320	ND	D	OK	27.9543	52.1907	0.900724	1.71668	0.0048	0.0161144	yes	XLOC_005320	CG4302
XLOC_005321	ND	D	OK	15.0021	28.3705	0.919232	3.66031	5e-05	0.000273369	yes	XLOC_005321	CG15661
XLOC_005325	ND	D	OK	50.931	131.285	1.36608	5.08676	5e-05	0.000273369	yes	XLOC_005325	CG34203
XLOC_005334	ND	D	OK	3.47895	4.7765	0.4573	1.57193	0.00625	0.0202129	yes	XLOC_005334	cv-2
XLOC_005338	ND	D	OK	96.9781	144.278	0.573118	2.55944	5e-05	0.000273369	yes	XLOC_005338	Fkbp13
XLOC_005347	ND	D	OK	212.98	400.37	0.910617	3.93296	5e-05	0.000273369	yes	XLOC_005347	CG10433
XLOC_005348	ND	D	OK	10.9812	19.0753	0.796664	2.60515	5e-05	0.000273369	yes	XLOC_005348	CG15673
XLOC_005351	ND	D	OK	31.4549	15.5615	-1.01531	-4.53175	5e-05	0.000273369	yes	XLOC_005351	PTP-ER
XLOC_005355	ND	D	OK	1.37753	2.58542	0.908314	1.57496	0.008	0.0248883	yes	XLOC_005355	pirk
XLOC_005361	ND	D	OK	76.2421	136.517	0.840418	3.77825	5e-05	0.000273369	yes	XLOC_005361	HmgZ
XLOC_005367	ND	D	OK	48.3059	32.8513	-0.556248	-2.31581	0.0001	0.000521172	yes	XLOC_005367	CG13492
XLOC_005369	ND	D	OK	83.348	127.277	0.610755	2.58592	5e-05	0.000273369	yes	XLOC_005369	CG4363
XLOC_005370	ND	D	OK	59.6703	81.9384	0.457527	1.85029	0.00145	0.00571103	yes	XLOC_005370	CG4377
XLOC_005388	ND	D	OK	20.1184	25.6008	0.347672	1.38955	0.01565	0.0444227	yes	XLOC_005388	CG11073
XLOC_005389	ND	D	OK	42.183	24.7827	-0.767332	-2.95361	5e-05	0.000273369	yes	XLOC_005389	Vrp1
XLOC_005395	ND	D	OK	21.6119	33.9702	0.652443	1.60272	0.0055	0.0180872	yes	XLOC_005395	CG3074
XLOC_005398	ND	D	OK	90.2815	310.985	1.78434	7.55759	5e-05	0.000273369	yes	XLOC_005398	CG3290
XLOC_005399	ND	D	OK	1.8142	14.0473	2.95289	7.24259	5e-05	0.000273369	yes	XLOC_005399	CG3264
XLOC_005400	ND	D	OK	5.73009	7.85734	0.455482	1.42335	0.0143	0.0410619	yes	XLOC_005400	CG30278,Oatp58Da
XLOC_005401	ND	D	OK	5.51794	8.37257	0.601542	1.83026	0.00165	0.00640425	yes	XLOC_005401	Oatp58Db
XLOC_005402	ND	D	OK	14.1714	20.2505	0.514975	2.2215	0.00015	0.000751259	yes	XLOC_005402	Oatp58Dc
XLOC_005403	ND	D	OK	17.5848	30.1399	0.777345	3.47745	5e-05	0.000273369	yes	XLOC_005403	wdp
XLOC_005407	ND	D	OK	38.0021	64.3423	0.759688	3.27805	5e-05	0.000273369	yes	XLOC_005407	CG3624
XLOC_005413	ND	D	OK	55.3686	28.2835	-0.969107	-3.88282	5e-05	0.000273369	yes	XLOC_005413	px
XLOC_005415	ND	D	OK	16.5848	10.0633	-0.720759	-3.19506	5e-05	0.000273369	yes	XLOC_005415	CG4294
XLOC_005421	ND	D	OK	4.72689	6.71173	0.505792	1.39307	0.01715	0.0479689	yes	XLOC_005421	Ugt58Fa
XLOC_005427	ND	D	OK	8.16329	18.2094	1.15746	4.08882	5e-05	0.000273369	yes	XLOC_005427	Cyp6d2
XLOC_005435	ND	D	OK	1.79036	0.944491	-0.922644	-1.41602	0.0174	0.0486012	yes	XLOC_005435	CG42260
XLOC_005436	ND	D	OK	888.371	558.39	-0.66989	-2.43167	5e-05	0.000273369	yes	XLOC_005436	CycB
XLOC_005437	ND	D	OK	16.4056	12.1624	-0.431763	-1.91136	0.00065	0.00281122	yes	XLOC_005437	CG13531
XLOC_005443	ND	D	OK	50.0146	24.2157	-1.0464	-4.61879	5e-05	0.000273369	yes	XLOC_005443	Nup214
XLOC_005448	ND	D	OK	28.3164	40.8768	0.529644	1.89933	0.00115	0.00464858	yes	XLOC_005448	CG32833,CG32834
XLOC_005469	ND	D	OK	5.05616	3.73721	-0.436079	-1.67775	0.0043	0.0146986	yes	XLOC_005469	CG34371
XLOC_005480	ND	D	OK	0	4.80426	Inf	NA	5e-05	0.000273369	yes	XLOC_005480	CG30413
XLOC_005483	ND	D	OK	18.3443	8.90847	-1.04208	-2.49228	0.00045	0.00203564	yes	XLOC_005483	vir
XLOC_005484	ND	D	OK	29.5282	17.5933	-0.74707	-2.4176	5e-05	0.000273369	yes	XLOC_005484	CG3493
XLOC_005489	ND	D	OK	6.08346	4.29302	-0.502899	-1.78893	0.00225	0.00840497	yes	XLOC_005489	CG3520
XLOC_005490	ND	D	OK	80.1063	110.384	0.462543	1.9818	0.00075	0.0031853	yes	XLOC_005490	CG9812
XLOC_005497	ND	D	OK	94.8992	171.975	0.857731	3.85945	5e-05	0.000273369	yes	XLOC_005497	CG3906
XLOC_005506	ND	D	OK	2.07959	8.08762	1.95942	3.11106	5e-05	0.000273369	yes	XLOC_005506	IM18
XLOC_005507	ND	D	OK	25.9286	40.2511	0.634483	2.31781	5e-05	0.000273369	yes	XLOC_005507	CG17664
XLOC_005509	ND	D	OK	156.59	239.02	0.610143	2.75998	5e-05	0.000273369	yes	XLOC_005509	CG4019
XLOC_005510	ND	D	OK	52.5227	91.9209	0.807454	2.91832	5e-05	0.000273369	yes	XLOC_005510	l(2)efl
XLOC_005511	ND	D	OK	38.839	20.5395	-0.919107	-3.80779	5e-05	0.000273369	yes	XLOC_005511	CG30183
XLOC_005512	ND	D	OK	42.6174	32.4808	-0.391852	-1.54955	0.0069	0.0220062	yes	XLOC_005512	CG4091
XLOC_005515	ND	D	OK	50.7685	31.4047	-0.69295	-3.06554	5e-05	0.000273369	yes	XLOC_005515	egl
XLOC_005520	ND	D	OK	72.5447	49.9022	-0.539767	-2.3872	5e-05	0.000273369	yes	XLOC_005520	Ssrp
XLOC_005522	ND	D	OK	20.2979	39.9595	0.977208	4.21124	5e-05	0.000273369	yes	XLOC_005522	CG4797
XLOC_005524	ND	D	OK	0	22.5267	Inf	NA	0.00685	0.0218881	yes	XLOC_005524	snoRNA:Psi18S-176
XLOC_005529	ND	D	OK	53.0116	40.0829	-0.403323	-1.71211	0.003	0.0108201	yes	XLOC_005529	bgcn,wibg
XLOC_005546	ND	D	OK	23.7294	17.8732	-0.408874	-1.40462	0.014	0.0403146	yes	XLOC_005546	CG10904
XLOC_005548	ND	D	OK	42.6015	57.9679	0.44435	1.9767	0.00045	0.00203564	yes	XLOC_005548	Phm
XLOC_005552	ND	D	OK	19.7676	29.4123	0.573277	2.3887	0.0001	0.000521172	yes	XLOC_005552	CG3907
XLOC_005558	ND	D	OK	26.0383	35.517	0.447878	1.75991	0.00245	0.00905866	yes	XLOC_005558	gammaSnap
XLOC_005563	ND	D	OK	23.631	14.7944	-0.675635	-3.04438	5e-05	0.000273369	yes	XLOC_005563	gek
XLOC_005564	ND	D	OK	29.8761	10.3517	-1.52913	-6.71247	5e-05	0.000273369	yes	XLOC_005564	CG4049
XLOC_005565	ND	D	OK	21.8083	14.8772	-0.551774	-2.31232	5e-05	0.000273369	yes	XLOC_005565	CG13569,tamo
XLOC_005573	ND	D	OK	0.710808	1.78789	1.33072	2.46739	0.00015	0.000751259	yes	XLOC_005573	slbo
XLOC_005575	ND	D	OK	93.8084	43.3829	-1.11259	-4.54297	5e-05	0.000273369	yes	XLOC_005575	slik
XLOC_005586	ND	D	OK	70.7849	43.1802	-0.713072	-3.09498	5e-05	0.000273369	yes	XLOC_005586	CG4589
XLOC_005587	ND	D	OK	71.8975	45.6587	-0.655052	-2.9576	5e-05	0.000273369	yes	XLOC_005587	CG4612
XLOC_005591	ND	D	OK	22.683	14.2511	-0.670539	-2.15911	0.00035	0.00161865	yes	XLOC_005591	Fcp1
XLOC_005599	ND	D	OK	10.3402	16.9957	0.716906	2.51172	5e-05	0.000273369	yes	XLOC_005599	CG4781
XLOC_005607	ND	D	OK	2.55448	1.66674	-0.616001	-1.82951	0.0018	0.00691238	yes	XLOC_005607	CG33988
XLOC_005609	ND	D	OK	307.711	410.389	0.415416	1.68935	0.0036	0.0127084	yes	XLOC_005609	CG16936
XLOC_005610	ND	D	OK	41.1677	24.0804	-0.773652	-3.46109	5e-05	0.000273369	yes	XLOC_005610	Eps-15
XLOC_005611	ND	D	OK	20.3178	13.8468	-0.553194	-2.45873	5e-05	0.000273369	yes	XLOC_005611	egg
XLOC_005615	ND	D	OK	31.6245	42.2475	0.417824	1.84678	0.0019	0.00724974	yes	XLOC_005615	Reg-5
XLOC_005617	ND	D	OK	22.0675	15.9046	-0.472486	-1.80898	0.0016	0.00623883	yes	XLOC_005617	Orc4
XLOC_005622	ND	D	OK	9.34717	13.1467	0.492104	1.9791	0.00085	0.00356227	yes	XLOC_005622	pain
XLOC_005623	ND	D	OK	3.66832	5.50407	0.585378	1.52143	0.0081	0.0251609	yes	XLOC_005623	CG30427
XLOC_005628	ND	D	OK	136.317	182.572	0.421503	1.77705	0.00255	0.00939757	yes	XLOC_005628	CG2765
XLOC_005629	ND	D	OK	5.22164	10.1743	0.962348	2.18001	0.00045	0.00203564	yes	XLOC_005629	CG30424
XLOC_005631	ND	D	OK	20.5609	48.2036	1.22924	2.24348	0.00045	0.00203564	yes	XLOC_005631	Phk-3
XLOC_005632	ND	D	OK	56.2067	78.9636	0.490445	2.2133	5e-05	0.000273369	yes	XLOC_005632	CG2736
XLOC_005633	ND	D	OK	61.8878	92.5519	0.580609	2.58003	5e-05	0.000273369	yes	XLOC_005633	emp
XLOC_005634	ND	D	OK	104.845	64.8761	-0.692502	-2.74268	5e-05	0.000273369	yes	XLOC_005634	zip
XLOC_005636	ND	D	OK	4.33967	6.04392	0.477898	1.49847	0.011	0.0328027	yes	XLOC_005636	gol
XLOC_005641	ND	D	OK	31.9069	51.9299	0.702696	3.16989	5e-05	0.000273369	yes	XLOC_005641	CG9380
XLOC_005669	ND	D	OK	1.39266	0.636816	-1.12889	-1.91846	0.00285	0.0103675	yes	XLOC_005669	Lsp1gamma
XLOC_005670	ND	D	OK	69.3377	46.8977	-0.564123	-2.37415	5e-05	0.000273369	yes	XLOC_005670	Pk61C
XLOC_005671	ND	D	OK	10.5243	16.563	0.654242	2.35839	5e-05	0.000273369	yes	XLOC_005671	CG6845
XLOC_005672	ND	D	OK	11.4404	15.8807	0.473135	1.94948	0.0007	0.00300059	yes	XLOC_005672	p130CAS
XLOC_005683	ND	D	OK	10.541	15.1212	0.520557	1.97782	0.00075	0.0031853	yes	XLOC_005683	miple
XLOC_005684	ND	D	OK	20.6828	29.036	0.489415	1.90614	0.00065	0.00281122	yes	XLOC_005684	miple2
XLOC_005686	ND	D	OK	1.43139	1.00522	-0.509911	-1.48523	0.0112	0.0333207	yes	XLOC_005686	CG42377
XLOC_005687	ND	D	OK	19.8261	12.6639	-0.646675	-2.7978	5e-05	0.000273369	yes	XLOC_005687	RhoGEF3
XLOC_005692	ND	D	OK	15.0566	10.1026	-0.575671	-2.47851	5e-05	0.000273369	yes	XLOC_005692	CG1233
XLOC_005696	ND	D	OK	56.6759	25.9855	-1.12503	-4.74969	5e-05	0.000273369	yes	XLOC_005696	hipk
XLOC_005698	ND	D	OK	38.1598	18.5223	-1.04279	-4.16113	5e-05	0.000273369	yes	XLOC_005698	MED14
XLOC_005700	ND	D	OK	43.3772	72.714	0.745297	3.37088	5e-05	0.000273369	yes	XLOC_005700	CG12030
XLOC_005701	ND	D	OK	12.9026	9.89181	-0.383357	-1.58188	0.00595	0.0193724	yes	XLOC_005701	Rev1
XLOC_005713	ND	D	OK	114.18	42.2053	-1.43581	-3.77397	5e-05	0.000273369	yes	XLOC_005713	CG32479
XLOC_005714	ND	D	OK	3.84691	6.00563	0.642618	1.47401	0.01065	0.0318997	yes	XLOC_005714	CG34056,CG34057
XLOC_005715	ND	D	OK	11.4529	20.9048	0.868117	2.24276	0.0005	0.00222999	yes	XLOC_005715	CG13905
XLOC_005718	ND	D	OK	6.28124	3.98523	-0.656388	-2.36067	0.00015	0.000751259	yes	XLOC_005718	CG13908
XLOC_005721	ND	D	OK	51.1546	85.0765	0.733897	3.06766	5e-05	0.000273369	yes	XLOC_005721	CG13912
XLOC_005724	ND	D	OK	47.8517	86.6025	0.855838	2.94841	5e-05	0.000273369	yes	XLOC_005724	LysB
XLOC_005726	ND	D	OK	30.5328	58.8944	0.947772	2.81944	5e-05	0.000273369	yes	XLOC_005726	LysE
XLOC_005730	ND	D	OK	10.3011	14.9535	0.537686	1.56234	0.0071	0.0225378	yes	XLOC_005730	CG33966
XLOC_005736	ND	D	OK	1.63864	0.921424	-0.830559	-1.752	0.00235	0.00873349	yes	XLOC_005736	CG32333
XLOC_005738	ND	D	OK	28.0795	38.1962	0.443911	1.94296	0.0007	0.00300059	yes	XLOC_005738	scf
XLOC_005740	ND	D	OK	33.7326	22.4274	-0.588883	-1.79235	0.0017	0.00657066	yes	XLOC_005740	CG2469
XLOC_005742	ND	D	OK	43.5909	63.5321	0.543458	2.35441	5e-05	0.000273369	yes	XLOC_005742	Myo61F
XLOC_005744	ND	D	OK	57.9948	39.7543	-0.544814	-1.68869	0.0042	0.0144199	yes	XLOC_005744	msd1
XLOC_005763	ND	D	OK	39.8703	18.9076	-1.07635	-4.76525	5e-05	0.000273369	yes	XLOC_005763	CG7852
XLOC_005764	ND	D	OK	59.1808	78.3038	0.403953	1.79398	0.0021	0.00789993	yes	XLOC_005764	Cct1
XLOC_005769	ND	D	OK	72.119	29.3849	-1.29531	-5.33044	5e-05	0.000273369	yes	XLOC_005769	CG13917
XLOC_005782	ND	D	OK	17.3169	7.98332	-1.11712	-4.75254	5e-05	0.000273369	yes	XLOC_005782	CG13921
XLOC_005783	ND	D	OK	20.4491	15.0873	-0.438701	-1.85713	0.0015	0.00588283	yes	XLOC_005783	CG8001
XLOC_005784	ND	D	OK	28.1169	18.4373	-0.608812	-2.11399	0.0005	0.00222999	yes	XLOC_005784	CG12018
XLOC_005789	ND	D	OK	17.6864	25.0176	0.500307	1.51552	0.00875	0.0268917	yes	XLOC_005789	GV1
XLOC_005793	ND	D	OK	16.1855	25.0877	0.632277	2.35249	5e-05	0.000273369	yes	XLOC_005793	CG12026
XLOC_005797	ND	D	OK	7.34076	5.39641	-0.44393	-1.53817	0.0075	0.0236007	yes	XLOC_005797	CG5690
XLOC_005811	ND	D	OK	3.59362	12.2553	1.76989	3.88813	5e-05	0.000273369	yes	XLOC_005811	CG32302
XLOC_005813	ND	D	OK	44.5387	93.8193	1.07483	4.43004	5e-05	0.000273369	yes	XLOC_005813	yellow-g2
XLOC_005818	ND	D	OK	16.4508	10.8371	-0.602171	-2.19211	0.0002	0.000976131	yes	XLOC_005818	CG9004
XLOC_005819	ND	D	OK	13.088	7.75108	-0.755774	-3.30413	5e-05	0.000273369	yes	XLOC_005819	CG13800
XLOC_005820	ND	D	OK	94.7644	50.7374	-0.901294	-2.83896	5e-05	0.000273369	yes	XLOC_005820	CG42669
XLOC_005824	ND	D	OK	42.4945	31.7625	-0.419954	-1.88775	0.00135	0.00535669	yes	XLOC_005824	dos
XLOC_005827	ND	D	OK	66.2158	94.2429	0.509209	1.44776	0.01145	0.0339748	yes	XLOC_005827	CG16986
XLOC_005828	ND	D	OK	105.053	48.0738	-1.12779	-4.62454	5e-05	0.000273369	yes	XLOC_005828	CG42245,MEP-1
XLOC_005829	ND	D	OK	16.1883	30.8657	0.931049	3.32444	5e-05	0.000273369	yes	XLOC_005829	CG1143
XLOC_005830	ND	D	OK	11.3639	19.1454	0.752547	2.38385	0.0001	0.000521172	yes	XLOC_005830	CG1246
XLOC_005835	ND	D	OK	116.334	92.1756	-0.335816	-1.51216	0.0083	0.0256877	yes	XLOC_005835	CG1240
XLOC_005836	ND	D	OK	37.8508	16.8076	-1.17121	-5.13891	5e-05	0.000273369	yes	XLOC_005836	Atg2
XLOC_005839	ND	D	OK	6.97139	5.20077	-0.422721	-1.55873	0.00725	0.022935	yes	XLOC_005839	Shab
XLOC_005848	ND	D	OK	21.6961	29.0885	0.423011	1.58683	0.0065	0.0208948	yes	XLOC_005848	CG32485
XLOC_005851	ND	D	OK	120.447	87.3837	-0.462963	-1.96769	0.00075	0.0031853	yes	XLOC_005851	CG11486
XLOC_005859	ND	D	OK	89.8665	41.7453	-1.10617	-4.74401	5e-05	0.000273369	yes	XLOC_005859	BtbVII
XLOC_005860	ND	D	OK	22.5467	14.7191	-0.615229	-2.54287	5e-05	0.000273369	yes	XLOC_005860	CG14956
XLOC_005863	ND	D	OK	27.2382	45.5034	0.740342	1.94443	0.001	0.00411942	yes	XLOC_005863	CG32280
XLOC_005865	ND	D	OK	47.9545	20.5775	-1.2206	-5.27764	5e-05	0.000273369	yes	XLOC_005865	CG12734,CG42494
XLOC_005866	ND	D	OK	7.29246	39.2384	2.42779	4.48929	5e-05	0.000273369	yes	XLOC_005866	CG32284
XLOC_005873	ND	D	OK	117.042	40.8565	-1.51838	-6.11032	5e-05	0.000273369	yes	XLOC_005873	CG11505
XLOC_005881	ND	D	OK	2.84417	9.69323	1.76897	2.21943	0.0179	0.049833	yes	XLOC_005881	dro2
XLOC_005882	ND	D	OK	0	3.42829	Inf	NA	5e-05	0.000273369	yes	XLOC_005882	dro3
XLOC_005883	ND	D	OK	62.0259	98.8363	0.672171	1.81955	0.003	0.0108201	yes	XLOC_005883	dro4
XLOC_005884	ND	D	OK	109.198	155.032	0.505619	1.83706	0.00155	0.00606018	yes	XLOC_005884	dro5
XLOC_005886	ND	D	OK	255.204	393.804	0.625826	2.02336	0.0004	0.00182656	yes	XLOC_005886	PHGPx
XLOC_005888	ND	D	OK	80.7823	57.071	-0.501282	-1.84583	0.0015	0.00588283	yes	XLOC_005888	kst
XLOC_005889	ND	D	OK	1372.93	2011.26	0.550843	2.39	5e-05	0.000273369	yes	XLOC_005889	Drs
XLOC_005891	ND	D	OK	61.4215	87.637	0.512798	2.17511	0.0002	0.000976131	yes	XLOC_005891	CG12012
XLOC_005893	ND	D	OK	40.9751	31.2573	-0.390554	-1.74701	0.0018	0.00691238	yes	XLOC_005893	armi
XLOC_005895	ND	D	OK	9.8145	15.1399	0.625372	2.00373	0.0004	0.00182656	yes	XLOC_005895	CG42324
XLOC_005896	ND	D	OK	33.13	24.9834	-0.40717	-1.7835	0.00155	0.00606018	yes	XLOC_005896	Eip63E
XLOC_005905	ND	D	OK	109.435	37.7324	-1.53619	-6.04954	5e-05	0.000273369	yes	XLOC_005905	enc
XLOC_005915	ND	D	OK	3.06908	1.34375	-1.19155	-3.12881	5e-05	0.000273369	yes	XLOC_005915	scrt
XLOC_005926	ND	D	OK	3.97265	7.12883	0.843564	2.35773	0.00015	0.000751259	yes	XLOC_005926	CG18869
XLOC_005929	ND	D	OK	17.4602	23.6665	0.438777	1.79896	0.0018	0.00691238	yes	XLOC_005929	CG14989
XLOC_005932	ND	D	OK	29.3014	17.098	-0.777146	-3.48551	5e-05	0.000273369	yes	XLOC_005932	Ack
XLOC_005936	ND	D	OK	14.2736	21.3209	0.578919	2.34449	0.00015	0.000751259	yes	XLOC_005936	CG1299
XLOC_005939	ND	D	OK	51.3641	17.3514	-1.56571	-0.773935	0.00385	0.0134135	yes	XLOC_005939	CG1308
XLOC_005940	ND	D	OK	9.65101	3.90135	-1.30671	-2.18434	0.0006	0.00262067	yes	XLOC_005940	CG1295
XLOC_005941	ND	D	OK	0.375094	2.97148	2.98586	2.50011	0.00315	0.0112808	yes	XLOC_005941	Cpr64Ad
XLOC_005942	ND	D	OK	33.796	16.8976	-1.00004	-4.34576	5e-05	0.000273369	yes	XLOC_005942	CG1332
XLOC_005943	ND	D	OK	22.5441	30.0174	0.413051	1.74332	0.00225	0.00840497	yes	XLOC_005943	CG14997
XLOC_005944	ND	D	OK	37.2258	23.3813	-0.670949	-3.02673	5e-05	0.000273369	yes	XLOC_005944	pav
XLOC_005947	ND	D	OK	11.8742	20.7296	0.803862	1.86454	0.0013	0.00518263	yes	XLOC_005947	CG1268
XLOC_005954	ND	D	OK	25.5037	10.2773	-1.31124	-5.79893	5e-05	0.000273369	yes	XLOC_005954	CG32251
XLOC_005960	ND	D	OK	65.7632	105.18	0.677513	3.03754	5e-05	0.000273369	yes	XLOC_005960	CG11347
XLOC_005970	ND	D	OK	2.12171	4.08028	0.943442	2.44922	5e-05	0.000273369	yes	XLOC_005970	CG11353
XLOC_005974	ND	D	OK	88.7187	64.8454	-0.452234	-2.02215	0.0004	0.00182656	yes	XLOC_005974	Rpd3
XLOC_005983	ND	D	OK	61.265	113.723	0.892386	3.76345	5e-05	0.000273369	yes	XLOC_005983	CG13704
XLOC_005984	ND	D	OK	12.1255	19.8377	0.710199	2.65043	5e-05	0.000273369	yes	XLOC_005984	Rh50
XLOC_005996	ND	D	OK	193.302	241.653	0.322075	1.38568	0.0159	0.0450189	yes	XLOC_005996	CG4769
XLOC_006002	ND	D	OK	43.0971	14.768	-1.54512	-6.34924	5e-05	0.000273369	yes	XLOC_006002	CG5146
XLOC_006003	ND	D	OK	24.534	75.8025	1.62746	7.08376	5e-05	0.000273369	yes	XLOC_006003	CG5150
XLOC_006005	ND	D	OK	11.3694	6.67267	-0.768819	-3.17739	5e-05	0.000273369	yes	XLOC_006005	Blimp-1
XLOC_006007	ND	D	OK	17.113	10.795	-0.664737	-2.51943	5e-05	0.000273369	yes	XLOC_006007	sif
XLOC_006009	ND	D	OK	72.7017	39.2664	-0.888694	-3.80843	5e-05	0.000273369	yes	XLOC_006009	Ubp64E
XLOC_006011	ND	D	OK	39.1228	29.08	-0.427983	-1.91608	0.001	0.00411942	yes	XLOC_006011	scny
XLOC_006020	ND	D	OK	15.7611	29.6281	0.910595	3.52284	5e-05	0.000273369	yes	XLOC_006020	CG32407
XLOC_006023	ND	D	OK	763.502	1463.31	0.938531	3.73061	5e-05	0.000273369	yes	XLOC_006023	yip7
XLOC_006025	ND	D	OK	919.726	1925.69	1.0661	4.15493	5e-05	0.000273369	yes	XLOC_006025	Jon65Aiv
XLOC_006026	ND	D	OK	713.127	1600.14	1.16597	4.63253	5e-05	0.000273369	yes	XLOC_006026	Jon65Aiii
XLOC_006027	ND	D	OK	73.8516	194.272	1.39537	6.0696	5e-05	0.000273369	yes	XLOC_006027	Jon65Aii
XLOC_006028	ND	D	OK	15.3069	11.6392	-0.395187	-1.43401	0.0131	0.0380907	yes	XLOC_006028	tan
XLOC_006031	ND	D	OK	13.3883	24.1335	0.850063	2.11202	0.0004	0.00182656	yes	XLOC_006031	CG6602
XLOC_006047	ND	D	OK	69.4331	42.4436	-0.710078	-3.14944	5e-05	0.000273369	yes	XLOC_006047	Trn
XLOC_006057	ND	D	OK	11.9978	8.20397	-0.548372	-2.30018	5e-05	0.000273369	yes	XLOC_006057	sfl
XLOC_006066	ND	D	OK	6.80409	10.8557	0.673984	2.02969	0.00065	0.00281122	yes	XLOC_006066	CG14820
XLOC_006073	ND	D	OK	8.11334	5.67287	-0.516218	-1.83539	0.0021	0.00789993	yes	XLOC_006073	mp
XLOC_006074	ND	D	OK	19.7979	33.2064	0.746109	2.23134	0.00015	0.000751259	yes	XLOC_006074	CG14823
XLOC_006078	ND	D	OK	1.83763	7.23555	1.97725	2.12502	0.0031	0.0111214	yes	XLOC_006078	CG15829
XLOC_006079	ND	D	OK	121.751	258.019	1.08355	4.5736	5e-05	0.000273369	yes	XLOC_006079	CG8628
XLOC_006080	ND	D	OK	552.757	817.54	0.564645	2.53315	5e-05	0.000273369	yes	XLOC_006080	Dbi
XLOC_006082	ND	D	OK	8.73089	23.2945	1.41579	3.87722	5e-05	0.000273369	yes	XLOC_006082	CG8620
XLOC_006088	ND	D	OK	16.0777	20.8268	0.373381	1.56204	0.0062	0.0201024	yes	XLOC_006088	CG8605
XLOC_006094	ND	D	OK	70.8061	56.7374	-0.319574	-1.40766	0.0151	0.0430543	yes	XLOC_006094	smid
XLOC_006097	ND	D	OK	43.0262	58.4289	0.441465	1.96252	0.00055	0.00242421	yes	XLOC_006097	CG8562
XLOC_006100	ND	D	OK	0.784617	1.40396	0.83944	1.39809	0.01705	0.0477024	yes	XLOC_006100	CG42458
XLOC_006107	ND	D	OK	65.8159	31.4844	-1.0638	-4.58588	5e-05	0.000273369	yes	XLOC_006107	CG7546
XLOC_006112	ND	D	OK	31.3944	19.1216	-0.715301	-3.05759	5e-05	0.000273369	yes	XLOC_006112	CG33275
XLOC_006119	ND	D	OK	109.501	200.944	0.875847	3.86996	5e-05	0.000273369	yes	XLOC_006119	Hn
XLOC_006120	ND	D	OK	12.9627	7.24267	-0.839775	-3.20125	5e-05	0.000273369	yes	XLOC_006120	CG32365
XLOC_006123	ND	D	OK	19.8301	32.9332	0.731855	1.78481	0.00285	0.0103675	yes	XLOC_006123	CG32368
XLOC_006128	ND	D	OK	48.077	22.9049	-1.06969	-4.70672	5e-05	0.000273369	yes	XLOC_006128	nmo
XLOC_006129	ND	D	OK	25.7061	13.5441	-0.924447	-2.15288	0.0006	0.00262067	yes	XLOC_006129	CG13681
XLOC_006130	ND	D	OK	110.74	82.1984	-0.430001	-1.68884	0.0029	0.0105192	yes	XLOC_006130	Ect4
XLOC_006133	ND	D	OK	194.741	141.883	-0.456853	-1.7912	0.0023	0.00856651	yes	XLOC_006133	ldbr,msk
XLOC_006135	ND	D	OK	18.7347	11.0647	-0.759748	-3.08179	5e-05	0.000273369	yes	XLOC_006135	mus301
XLOC_006142	ND	D	OK	66.4911	126.819	0.931535	3.74726	5e-05	0.000273369	yes	XLOC_006142	CG8012
XLOC_006145	ND	D	OK	1.75031	1.12669	-0.635518	-1.82909	0.00195	0.00740708	yes	XLOC_006145	CG42330
XLOC_006155	ND	D	OK	15.8991	12.5654	-0.339496	-1.47557	0.0103	0.0309978	yes	XLOC_006155	CG7112
XLOC_006157	ND	D	OK	3.10199	17.5278	2.49838	5.1403	5e-05	0.000273369	yes	XLOC_006157	Jon66Ci
XLOC_006161	ND	D	OK	399.535	263.309	-0.601565	-2.44536	5e-05	0.000273369	yes	XLOC_006161	mtrm
XLOC_006162	ND	D	OK	64.1857	46.2144	-0.473909	-2.11754	0.00015	0.000751259	yes	XLOC_006162	Cbl
XLOC_006163	ND	D	OK	91.3049	35.7512	-1.3527	-5.33404	5e-05	0.000273369	yes	XLOC_006163	Gug
XLOC_006164	ND	D	OK	22.199	15.8852	-0.482811	-1.89269	0.00105	0.00429572	yes	XLOC_006164	CG6745,CG6765
XLOC_006165	ND	D	OK	49.4509	71.74	0.536781	2.26817	0.0002	0.000976131	yes	XLOC_006165	CG6776
XLOC_006167	ND	D	OK	52.8621	41.9897	-0.3322	-1.48956	0.00805	0.0250132	yes	XLOC_006167	foi
XLOC_006169	ND	D	OK	81.6346	47.124	-0.792718	-2.86781	5e-05	0.000273369	yes	XLOC_006169	rhea
XLOC_006170	ND	D	OK	44.8909	31.2843	-0.520985	-2.10483	0.0004	0.00182656	yes	XLOC_006170	CG32352
XLOC_006172	ND	D	OK	41.3247	30.074	-0.458487	-1.69783	0.00385	0.0134135	yes	XLOC_006172	CG32355
XLOC_006179	ND	D	OK	135.415	191.384	0.49908	1.78225	0.003	0.0108201	yes	XLOC_006179	Zasp66
XLOC_006180	ND	D	OK	3.92402	8.49838	1.11485	2.66636	0.0001	0.000521172	yes	XLOC_006180	Cpr66D
XLOC_006182	ND	D	OK	19.1071	24.2632	0.344662	1.45165	0.01205	0.0355575	yes	XLOC_006182	h
XLOC_006183	ND	D	OK	12.4736	7.68178	-0.699361	-2.93537	5e-05	0.000273369	yes	XLOC_006183	CG6511
XLOC_006185	ND	D	OK	2877.16	4509.25	0.648242	2.36189	5e-05	0.000273369	yes	XLOC_006185	Cp15
XLOC_006188	ND	D	OK	58.3168	34.7815	-0.74559	-2.08041	0.00065	0.00281122	yes	XLOC_006188	Fhos
XLOC_006192	ND	D	OK	18.2482	39.6458	1.11941	3.22207	5e-05	0.000273369	yes	XLOC_006192	CG32024
XLOC_006194	ND	D	OK	107.495	299.299	1.47731	6.52262	5e-05	0.000273369	yes	XLOC_006194	CG13309
XLOC_006197	ND	D	OK	57.6118	42.5422	-0.437471	-1.9773	0.00065	0.00281122	yes	XLOC_006197	Mcm7
XLOC_006204	ND	D	OK	43.0872	31.2188	-0.464843	-2.09839	0.00015	0.000751259	yes	XLOC_006204	CG5026
XLOC_006208	ND	D	OK	22.2434	14.8998	-0.578083	-2.56483	5e-05	0.000273369	yes	XLOC_006208	CG5087
XLOC_006214	ND	D	OK	17.1039	26.8836	0.652401	2.33654	0.00015	0.000751259	yes	XLOC_006214	CG32032
XLOC_006215	ND	D	OK	1055.75	1621.55	0.619097	2.4715	5e-05	0.000273369	yes	XLOC_006215	CG13315
XLOC_006219	ND	D	OK	65.2052	45.4253	-0.521493	-2.35321	5e-05	0.000273369	yes	XLOC_006219	CG4476
XLOC_006222	ND	D	OK	9.03589	13.9344	0.624918	2.04297	0.0006	0.00262067	yes	XLOC_006222	PGRP-LA
XLOC_006223	ND	D	OK	17.122	22.2653	0.378945	1.43635	0.0125	0.0366932	yes	XLOC_006223	PGRP-LC
XLOC_006231	ND	D	OK	43.0837	93.3484	1.11548	4.65904	5e-05	0.000273369	yes	XLOC_006231	Hsp22,Hsp67Bb
XLOC_006232	ND	D	OK	60.4259	90.122	0.576714	2.51244	5e-05	0.000273369	yes	XLOC_006232	CG4461
XLOC_006234	ND	D	OK	507.576	358.909	-0.500007	-2.01863	0.00035	0.00161865	yes	XLOC_006234	Hsp27
XLOC_006235	ND	D	OK	51.0461	71.5965	0.488087	2.16568	0.0002	0.000976131	yes	XLOC_006235	Cpr67B
XLOC_006237	ND	D	OK	133.564	221.785	0.731632	2.25797	5e-05	0.000273369	yes	XLOC_006237	aay
XLOC_006244	ND	D	OK	57.2313	31.3673	-0.867542	-3.65152	5e-05	0.000273369	yes	XLOC_006244	CG32043
XLOC_006246	ND	D	OK	133.975	49.5162	-1.43599	-5.32765	5e-05	0.000273369	yes	XLOC_006246	Jarid2
XLOC_006258	ND	D	OK	141.755	322.199	1.18456	2.06335	0.0006	0.00262067	yes	XLOC_006258	CG18180
XLOC_006261	ND	D	OK	268.915	208.248	-0.36885	-1.57295	0.00575	0.0188057	yes	XLOC_006261	alphaTub67C
XLOC_006264	ND	D	OK	36.5851	14.018	-1.38398	-6.03708	5e-05	0.000273369	yes	XLOC_006264	CG16711
XLOC_006270	ND	D	OK	70.7832	36.6923	-0.947932	-4.00602	5e-05	0.000273369	yes	XLOC_006270	CG8177
XLOC_006276	ND	D	OK	95.6778	58.2946	-0.714823	-3.07589	5e-05	0.000273369	yes	XLOC_006276	CG8108
XLOC_006283	ND	D	OK	4.09085	2.30202	-0.8295	-2.28508	0.00015	0.000751259	yes	XLOC_006283	dpr6
XLOC_006297	ND	D	OK	20.7237	13.0558	-0.666589	-2.83365	5e-05	0.000273369	yes	XLOC_006297	CG32062
XLOC_006306	ND	D	OK	43.6902	26.0308	-0.74709	-3.35586	5e-05	0.000273369	yes	XLOC_006306	simj
XLOC_006307	ND	D	OK	57.0474	41.407	-0.462287	-2.0751	0.0002	0.000976131	yes	XLOC_006307	CG11811
XLOC_006309	ND	D	OK	18.3302	13.6882	-0.421287	-1.87063	0.0011	0.00447501	yes	XLOC_006309	tna
XLOC_006322	ND	D	OK	16.2408	10.9491	-0.568803	-2.46777	0.00015	0.000751259	yes	XLOC_006322	SuUR
XLOC_006324	ND	D	OK	32.4692	20.8037	-0.642227	-2.89771	5e-05	0.000273369	yes	XLOC_006324	CG7839
XLOC_006329	ND	D	OK	89.5281	66.1775	-0.435999	-1.89779	0.00055	0.00242421	yes	XLOC_006329	CG42575
XLOC_006338	ND	D	OK	40.7222	26.5705	-0.615991	-2.74628	5e-05	0.000273369	yes	XLOC_006338	CG42671
XLOC_006342	ND	D	OK	11.3616	18.4445	0.699018	2.20855	0.00015	0.000751259	yes	XLOC_006342	CG7560
XLOC_006348	ND	D	OK	44.8174	29.293	-0.613501	-2.74179	5e-05	0.000273369	yes	XLOC_006348	chrb
XLOC_006359	ND	D	OK	15.5648	20.5866	0.403419	1.72211	0.0035	0.0123856	yes	XLOC_006359	CG32091
XLOC_006362	ND	D	OK	36.4089	28.3881	-0.359007	-1.58441	0.007	0.0222691	yes	XLOC_006362	TfIIEalpha
XLOC_006373	ND	D	OK	16.7572	12.1267	-0.466592	-2.00637	0.00055	0.00242421	yes	XLOC_006373	Klp68D
XLOC_006374	ND	D	OK	8.00069	11.7183	0.550567	1.51698	0.00945	0.0287124	yes	XLOC_006374	CG14130
XLOC_006375	ND	D	OK	2126.4	2756.15	0.374242	1.3796	0.01635	0.0460744	yes	XLOC_006375	RpL10Ab
XLOC_006381	ND	D	OK	2.0693	3.90259	0.915289	2.1945	0.0002	0.000976131	yes	XLOC_006381	byn
XLOC_006386	ND	D	OK	77.6615	123.752	0.672185	3.00979	5e-05	0.000273369	yes	XLOC_006386	CG14125
XLOC_006395	ND	D	OK	34.1016	27.0477	-0.334333	-1.43426	0.0131	0.0380907	yes	XLOC_006395	CG17153
XLOC_006398	ND	D	OK	8.84702	48.3369	2.44986	9.69046	5e-05	0.000273369	yes	XLOC_006398	Lsp2
XLOC_006402	ND	D	OK	25.7647	16.937	-0.605212	-2.58511	5e-05	0.000273369	yes	XLOC_006402	Nrx-IV
XLOC_006404	ND	D	OK	55.9306	85.1733	0.606764	2.73198	5e-05	0.000273369	yes	XLOC_006404	CAH2
XLOC_006406	ND	D	OK	57.8814	83.9941	0.537188	2.0912	0.0002	0.000976131	yes	XLOC_006406	Est-6,Est-P
XLOC_006416	ND	D	OK	155.826	123.719	-0.332863	-1.4652	0.0102	0.0307516	yes	XLOC_006416	vih
XLOC_006417	ND	D	OK	790.397	496.726	-0.670127	-2.37033	5e-05	0.000273369	yes	XLOC_006417	tral
XLOC_006425	ND	D	OK	31.1931	19.5578	-0.673481	-3.06156	5e-05	0.000273369	yes	XLOC_006425	Ptp69D
XLOC_006429	ND	D	OK	14.1214	6.34967	-1.15313	-3.43845	5e-05	0.000273369	yes	XLOC_006429	CG32113
XLOC_006432	ND	D	OK	31.1475	17.8581	-0.80254	-3.08952	5e-05	0.000273369	yes	XLOC_006432	CG11006
XLOC_006434	ND	D	OK	10.0719	4.6541	-1.11376	-4.78886	5e-05	0.000273369	yes	XLOC_006434	CG42588
XLOC_006435	ND	D	OK	48.8298	67.5385	0.467949	2.09856	0.00015	0.000751259	yes	XLOC_006435	CG11009
XLOC_006437	ND	D	OK	7.95439	11.5285	0.535385	2.23179	0.0001	0.000521172	yes	XLOC_006437	CG14120
XLOC_006440	ND	D	OK	0.7877	1.73395	1.13834	1.54903	0.0104	0.0312431	yes	XLOC_006440	CG14118
XLOC_006450	ND	D	OK	0.324641	1.15948	1.83656	1.95895	0.00595	0.0193724	yes	XLOC_006450	CG17672
XLOC_006451	ND	D	OK	58.5234	30.0967	-0.95941	-4.21729	5e-05	0.000273369	yes	XLOC_006451	SRm160
XLOC_006474	ND	D	OK	6373.57	12669.6	0.991198	3.52523	5e-05	0.000273369	yes	XLOC_006474	Nplp2
XLOC_006475	ND	D	OK	0	2.72749	Inf	NA	5e-05	0.000273369	yes	XLOC_006475	SNCF
XLOC_006477	ND	D	OK	0.167271	3.31035	4.30672	3.2346	0.0003	0.00140992	yes	XLOC_006477	ImpL1
XLOC_006481	ND	D	OK	24.7816	95.8788	1.95195	7.26268	5e-05	0.000273369	yes	XLOC_006481	CG10725
XLOC_006482	ND	D	OK	10.3226	16.6843	0.692686	2.02497	0.0006	0.00262067	yes	XLOC_006482	CG14109
XLOC_006483	ND	D	OK	26.0923	16.193	-0.688258	-2.61314	5e-05	0.000273369	yes	XLOC_006483	CG10732
XLOC_006484	ND	D	OK	2.43131	1.15939	-1.06837	-1.64463	0.01	0.0301845	yes	XLOC_006484	CG10738
XLOC_006485	ND	D	OK	16.9134	22.5768	0.416674	1.81572	0.00145	0.00571103	yes	XLOC_006485	stv
XLOC_006487	ND	D	OK	43.8035	14.8888	-1.55682	-6.5723	5e-05	0.000273369	yes	XLOC_006487	CG17689
XLOC_006493	ND	D	OK	41.6928	25.6125	-0.702951	-3.14203	5e-05	0.000273369	yes	XLOC_006493	Gl
XLOC_006495	ND	D	OK	80.7827	46.627	-0.792883	-3.12044	5e-05	0.000273369	yes	XLOC_006495	ssp2
XLOC_006496	ND	D	OK	40.6482	20.1658	-1.01128	-1.7012	0.00445	0.0151297	yes	XLOC_006496	CG32135
XLOC_006497	ND	D	OK	9.59256	12.8255	0.419029	1.63366	0.005	0.0166645	yes	XLOC_006497	Hsc70-1
XLOC_006502	ND	D	OK	108.943	38.937	-1.48437	-5.43279	5e-05	0.000273369	yes	XLOC_006502	CG9007
XLOC_006505	ND	D	OK	143.666	113.212	-0.343688	-1.41679	0.01395	0.0402277	yes	XLOC_006505	Hsc70Cb
XLOC_006507	ND	D	OK	43.1085	22.9719	-0.9081	-4.01665	5e-05	0.000273369	yes	XLOC_006507	CG32138
XLOC_006515	ND	D	OK	26.3964	16.8529	-0.647347	-2.79862	5e-05	0.000273369	yes	XLOC_006515	fz
XLOC_006523	ND	D	OK	24.2909	15.967	-0.605326	-2.71988	5e-05	0.000273369	yes	XLOC_006523	dlp
XLOC_006524	ND	D	OK	13.8476	20.6581	0.577074	2.4776	5e-05	0.000273369	yes	XLOC_006524	ome
XLOC_006531	ND	D	OK	29.1916	18.8267	-0.632773	-2.80516	5e-05	0.000273369	yes	XLOC_006531	CG13472
XLOC_006532	ND	D	OK	79.1869	34.0064	-1.21945	-4.97608	5e-05	0.000273369	yes	XLOC_006532	CG9425
XLOC_006533	ND	D	OK	22.4945	16.2896	-0.465624	-2.06486	0.0001	0.000521172	yes	XLOC_006533	CG17839
XLOC_006535	ND	D	OK	0	4.3719	Inf	NA	5e-05	0.000273369	yes	XLOC_006535	Tom
XLOC_006536	ND	D	OK	0	2.47965	Inf	NA	5e-05	0.000273369	yes	XLOC_006536	Brd
XLOC_006548	ND	D	OK	11.7746	7.31887	-0.68598	-2.68157	5e-05	0.000273369	yes	XLOC_006548	Cep135
XLOC_006555	ND	D	OK	12.3048	5.54622	-1.14964	-4.96188	5e-05	0.000273369	yes	XLOC_006555	Tollo
XLOC_006563	ND	D	OK	34.8406	64.0538	0.878516	2.82925	5e-05	0.000273369	yes	XLOC_006563	CG7272
XLOC_006565	ND	D	OK	75.8287	139.279	0.877162	3.93029	5e-05	0.000273369	yes	XLOC_006565	Eip71CD
XLOC_006570	ND	D	OK	56.2394	28.2156	-0.99509	-4.23175	5e-05	0.000273369	yes	XLOC_006570	CG6498
XLOC_006574	ND	D	OK	46.3336	25.6894	-0.850885	-3.79054	5e-05	0.000273369	yes	XLOC_006574	RhoGAP71E
XLOC_006575	ND	D	OK	31.5018	15.8958	-0.986785	-4.19018	5e-05	0.000273369	yes	XLOC_006575	CG7372
XLOC_006588	ND	D	OK	30.5025	21.4233	-0.509748	-2.29809	5e-05	0.000273369	yes	XLOC_006588	dbo
XLOC_006592	ND	D	OK	11.7146	18.6109	0.667836	2.35974	0.00015	0.000751259	yes	XLOC_006592	CG17032
XLOC_006593	ND	D	OK	19.1753	38.9802	1.0235	3.96759	5e-05	0.000273369	yes	XLOC_006593	CG10516
XLOC_006598	ND	D	OK	40.603	27.3523	-0.569926	-2.56488	5e-05	0.000273369	yes	XLOC_006598	Hip14
XLOC_006602	ND	D	OK	7.16465	10.687	0.576887	1.75108	0.00315	0.0112808	yes	XLOC_006602	CG5895
XLOC_006603	ND	D	OK	64.0886	42.219	-0.602176	-2.24276	5e-05	0.000273369	yes	XLOC_006603	Mbs
XLOC_006604	ND	D	OK	45.6977	138.04	1.59489	6.84902	5e-05	0.000273369	yes	XLOC_006604	CG33258
XLOC_006605	ND	D	OK	0.878336	2.49639	1.507	1.99156	0.00215	0.00806707	yes	XLOC_006605	CG13075
XLOC_006609	ND	D	OK	56.9324	31.6088	-0.848925	-3.73177	5e-05	0.000273369	yes	XLOC_006609	Taf4
XLOC_006612	ND	D	OK	51.0946	27.4294	-0.897448	-3.94044	5e-05	0.000273369	yes	XLOC_006612	CG16838
XLOC_006621	ND	D	OK	6.48424	8.85493	0.449544	1.51959	0.0089	0.0272948	yes	XLOC_006621	CG32155
XLOC_006627	ND	D	OK	17.9613	31.4762	0.809371	2.07583	0.0009	0.00375012	yes	XLOC_006627	CG13067
XLOC_006641	ND	D	OK	66.0231	89.2432	0.434772	1.84941	0.0017	0.00657066	yes	XLOC_006641	retinin
XLOC_006652	ND	D	OK	28.9755	15.763	-0.878296	-3.91964	5e-05	0.000273369	yes	XLOC_006652	CG4877
XLOC_006653	ND	D	OK	3.05197	5.27189	0.78858	1.98287	0.00065	0.00281122	yes	XLOC_006653	CG4680
XLOC_006654	ND	D	OK	56.816	78.278	0.462309	2.01319	0.0003	0.00140992	yes	XLOC_006654	TMS1
XLOC_006660	ND	D	OK	218.421	298.618	0.451189	1.86638	0.0011	0.00447501	yes	XLOC_006660	CG4169
XLOC_006663	ND	D	OK	47.1547	34.6954	-0.442658	-1.94308	0.00075	0.0031853	yes	XLOC_006663	CG32164
XLOC_006668	ND	D	OK	42.6087	16.6989	-1.35139	-5.74012	5e-05	0.000273369	yes	XLOC_006668	Dab
XLOC_006673	ND	D	OK	141.748	111.261	-0.349388	-1.556	0.00775	0.0242295	yes	XLOC_006673	CG9705
XLOC_006677	ND	D	OK	45.2848	20.7343	-1.12701	-4.90432	5e-05	0.000273369	yes	XLOC_006677	CG9715
XLOC_006689	ND	D	OK	29.3855	19.2099	-0.613255	-2.75488	5e-05	0.000273369	yes	XLOC_006689	CG7728
XLOC_006690	ND	D	OK	10.1749	7.54342	-0.431723	-1.61013	0.00545	0.0179577	yes	XLOC_006690	Fit2
XLOC_006691	ND	D	OK	35.8101	20.5472	-0.801425	-2.01141	0.00055	0.00242421	yes	XLOC_006691	CG7730
XLOC_006694	ND	D	OK	52.9271	81.0201	0.614273	2.60612	5e-05	0.000273369	yes	XLOC_006694	TpnC73F
XLOC_006701	ND	D	OK	11.3763	7.20992	-0.657972	-2.81732	5e-05	0.000273369	yes	XLOC_006701	CG7692
XLOC_006707	ND	D	OK	9.20331	14.0879	0.614228	2.23534	0.0001	0.000521172	yes	XLOC_006707	CG7589
XLOC_006714	ND	D	OK	68.3891	48.2477	-0.503307	-2.15542	0.00015	0.000751259	yes	XLOC_006714	Nedd4
XLOC_006715	ND	D	OK	120.069	221.435	0.883015	3.98698	5e-05	0.000273369	yes	XLOC_006715	CG7542
XLOC_006717	ND	D	OK	8.8581	12.8502	0.536725	1.74995	0.0026	0.00956445	yes	XLOC_006717	CG7497
XLOC_006725	ND	D	OK	107.736	136.303	0.339324	1.48788	0.0092	0.0281213	yes	XLOC_006725	CG7430
XLOC_006735	ND	D	OK	12.6122	7.50186	-0.749497	-2.85358	5e-05	0.000273369	yes	XLOC_006735	mus304
XLOC_006737	ND	D	OK	8.40282	12.1444	0.53134	1.55705	0.00755	0.0237212	yes	XLOC_006737	gk
XLOC_006740	ND	D	OK	32.2612	42.9319	0.412248	1.46326	0.0106	0.0317781	yes	XLOC_006740	CheA75a
XLOC_006741	ND	D	OK	1.32494	14.9667	3.49776	4.36891	0.0007	0.00300059	yes	XLOC_006741	CG32198
XLOC_006743	ND	D	OK	0	1.2947	Inf	NA	5e-05	0.000273369	yes	XLOC_006743	CG7271
XLOC_006748	ND	D	OK	33.2662	21.7231	-0.614826	-2.63555	5e-05	0.000273369	yes	XLOC_006748	bora
XLOC_006749	ND	D	OK	31.5876	19.8747	-0.668422	-3.02108	5e-05	0.000273369	yes	XLOC_006749	MYPT-75D
XLOC_006751	ND	D	OK	8.0922	11.6302	0.523274	1.78522	0.003	0.0108201	yes	XLOC_006751	GNBP1
XLOC_006753	ND	D	OK	29.1118	20.5361	-0.503442	-1.49018	0.0119	0.0351558	yes	XLOC_006753	CG32202
XLOC_006758	ND	D	OK	101.837	68.4515	-0.573101	-2.57667	5e-05	0.000273369	yes	XLOC_006758	l(3)neo26
XLOC_006759	ND	D	OK	198.786	283.383	0.51154	2.11297	0.00015	0.000751259	yes	XLOC_006759	Cat
XLOC_006767	ND	D	OK	49.9799	31.7333	-0.655349	-2.124	0.00055	0.00242421	yes	XLOC_006767	Ugt
XLOC_006771	ND	D	OK	12.3332	9.09959	-0.438668	-1.72927	0.002	0.00757148	yes	XLOC_006771	CG6841
XLOC_006772	ND	D	OK	16.2518	31.7771	0.967388	3.75581	5e-05	0.000273369	yes	XLOC_006772	CG6839
XLOC_006773	ND	D	OK	9.48924	13.7922	0.539487	1.6447	0.0049	0.016385	yes	XLOC_006773	CG6836
XLOC_006787	ND	D	OK	26.5879	14.1234	-0.912687	-3.97024	5e-05	0.000273369	yes	XLOC_006787	Chd3
XLOC_006801	ND	D	OK	17.2781	27.4289	0.666754	1.50887	0.00835	0.0258031	yes	XLOC_006801	CG9372
XLOC_006802	ND	D	OK	39.343	27.7832	-0.501892	-1.90719	0.0007	0.00300059	yes	XLOC_006802	CG9376
XLOC_006803	ND	D	OK	72.0803	56.1812	-0.359516	-1.62299	0.00445	0.0151297	yes	XLOC_006803	asf1
XLOC_006805	ND	D	OK	29.2142	43.5475	0.575917	2.46515	5e-05	0.000273369	yes	XLOC_006805	Gbeta76C
XLOC_006813	ND	D	OK	31.5801	21.7659	-0.536945	-2.3721	5e-05	0.000273369	yes	XLOC_006813	Deaf1
XLOC_006814	ND	D	OK	8.73361	12.7948	0.550911	1.76076	0.0027	0.00987857	yes	XLOC_006814	CG32221
XLOC_006815	ND	D	OK	23.5956	10.8979	-1.11446	-4.85136	5e-05	0.000273369	yes	XLOC_006815	kto
XLOC_006817	ND	D	OK	33.4162	16.4423	-1.02314	-4.55009	5e-05	0.000273369	yes	XLOC_006817	CG8334
XLOC_006829	ND	D	OK	41.3208	18.0325	-1.19627	-4.85826	5e-05	0.000273369	yes	XLOC_006829	kug
XLOC_006831	ND	D	OK	27.9091	14.8358	-0.911654	-3.9118	5e-05	0.000273369	yes	XLOC_006831	gig
XLOC_006832	ND	D	OK	76.5924	135.519	0.823217	1.6947	0.00445	0.0151297	yes	XLOC_006832	CG6981
XLOC_006836	ND	D	OK	17.3519	9.89572	-0.81022	-3.48369	5e-05	0.000273369	yes	XLOC_006836	Su(var)3-3
XLOC_006843	ND	D	OK	49.9083	38.5196	-0.373688	-1.63955	0.00425	0.0145571	yes	XLOC_006843	CG6597
XLOC_006844	ND	D	OK	169.035	125.925	-0.424758	-1.76941	0.002	0.00757148	yes	XLOC_006844	polo
XLOC_006846	ND	D	OK	17.5164	28.3706	0.695689	2.91088	5e-05	0.000273369	yes	XLOC_006846	CG6680
XLOC_006850	ND	D	OK	23.1797	41.0194	0.823442	3.60137	5e-05	0.000273369	yes	XLOC_006850	CG5618
XLOC_006855	ND	D	OK	55.3936	39.8446	-0.475335	-2.13663	0.00035	0.00161865	yes	XLOC_006855	RhoBTB
XLOC_006866	ND	D	OK	54.7084	77.2614	0.497985	2.12516	0.00015	0.000751259	yes	XLOC_006866	CG5932
XLOC_006867	ND	D	OK	2.44435	4.6892	0.939892	1.86606	0.0015	0.00588283	yes	XLOC_006867	CG5955
XLOC_006869	ND	D	OK	117.219	160.64	0.454629	1.93751	0.0009	0.00375012	yes	XLOC_006869	CG6020
XLOC_006870	ND	D	OK	158.404	206.314	0.381236	1.52015	0.00815	0.0252929	yes	XLOC_006870	CG32425
XLOC_006875	ND	D	OK	27.9913	42.7021	0.609328	2.21552	0.00015	0.000751259	yes	XLOC_006875	CG4858
XLOC_006879	ND	D	OK	13.9134	18.9691	0.447175	1.82409	0.0012	0.00482187	yes	XLOC_006879	CG13252
XLOC_006881	ND	D	OK	75.1334	49.9582	-0.588733	-1.59457	0.0066	0.0211894	yes	XLOC_006881	Pitslre
XLOC_006884	ND	D	OK	20.2518	7.63553	-1.40725	-6.16987	5e-05	0.000273369	yes	XLOC_006884	Spc105R
XLOC_006885	ND	D	OK	57.3936	41.6138	-0.463828	-2.08066	0.0003	0.00140992	yes	XLOC_006885	CG3680
XLOC_006888	ND	D	OK	33.352	47.4018	0.507166	1.97159	0.0009	0.00375012	yes	XLOC_006888	CG13255
XLOC_006897	ND	D	OK	40.6272	26.2301	-0.631223	-2.80706	5e-05	0.000273369	yes	XLOC_006897	siz
XLOC_006902	ND	D	OK	8.48377	15.2397	0.845062	1.68869	0.00295	0.0106777	yes	XLOC_006902	CG10512
XLOC_006906	ND	D	OK	76.3665	47.6903	-0.679243	-2.93806	5e-05	0.000273369	yes	XLOC_006906	pzg
XLOC_006917	ND	D	OK	52.8643	36.4647	-0.535793	-2.40439	5e-05	0.000273369	yes	XLOC_006917	Aef1
XLOC_006922	ND	D	OK	57.5109	24.8415	-1.21108	-5.27776	5e-05	0.000273369	yes	XLOC_006922	CG7597
XLOC_006929	ND	D	OK	28.1142	17.3459	-0.69671	-3.14985	5e-05	0.000273369	yes	XLOC_006929	Smc5
XLOC_006932	ND	D	OK	31.4105	24.0873	-0.38297	-1.53668	0.0064	0.0206256	yes	XLOC_006932	CG11307
XLOC_006952	ND	D	OK	128.15	77.6016	-0.723671	-3.11008	5e-05	0.000273369	yes	XLOC_006952	Nopp140
XLOC_006953	ND	D	OK	96.6467	73.8357	-0.388403	-1.67118	0.00415	0.0142821	yes	XLOC_006953	mub
XLOC_006955	ND	D	OK	18.8924	8.70616	-1.1177	-4.85379	5e-05	0.000273369	yes	XLOC_006955	CG14562
XLOC_006960	ND	D	OK	137.618	212.555	0.627159	2.59371	5e-05	0.000273369	yes	XLOC_006960	CG7470
XLOC_006961	ND	D	OK	27.9825	39.099	0.482606	2.1109	0.0003	0.00140992	yes	XLOC_006961	Act79B
XLOC_006964	ND	D	OK	932.033	1214.63	0.382068	1.45051	0.01295	0.0377519	yes	XLOC_006964	RpLP0
XLOC_006970	ND	D	OK	122.008	77.6689	-0.651573	-2.80925	5e-05	0.000273369	yes	XLOC_006970	Csp
XLOC_006977	ND	D	OK	18.8114	40.635	1.11112	4.67651	5e-05	0.000273369	yes	XLOC_006977	CG11426
XLOC_006978	ND	D	OK	4.63186	17.1241	1.88637	4.29596	5e-05	0.000273369	yes	XLOC_006978	CG11425
XLOC_006994	ND	D	OK	21.4791	14.5485	-0.56206	-2.34055	5e-05	0.000273369	yes	XLOC_006994	CG32452
XLOC_006996	ND	D	OK	24.3863	15.4701	-0.656595	-2.56381	5e-05	0.000273369	yes	XLOC_006996	CG11367
XLOC_006998	ND	D	OK	24.9402	16.2909	-0.614406	-2.72996	5e-05	0.000273369	yes	XLOC_006998	CG7369
XLOC_007008	ND	D	OK	74.8761	51.973	-0.526743	-2.36643	5e-05	0.000273369	yes	XLOC_007008	slif
XLOC_007010	ND	D	OK	9.82383	6.64581	-0.563841	-2.20026	0.00035	0.00161865	yes	XLOC_007010	CG11133
XLOC_007012	ND	D	OK	35.1498	24.7127	-0.508264	-2.2761	0.0002	0.000976131	yes	XLOC_007012	Mes2
XLOC_007021	ND	D	OK	31.0153	20.3808	-0.605772	-2.63764	5e-05	0.000273369	yes	XLOC_007021	nAcRalpha-80B
XLOC_007022	ND	D	OK	1717.21	2149.46	0.323909	1.3803	0.0168	0.047146	yes	XLOC_007022	CG32230
XLOC_007023	ND	D	OK	83.8351	63.395	-0.403185	-1.85025	0.00215	0.00806707	yes	XLOC_007023	AGO3
XLOC_007032	ND	D	OK	1.87635	0.633991	-1.56539	-1.67067	0.01035	0.0311114	yes	XLOC_007032	CG13405
XLOC_007036	ND	D	OK	11.3206	17.8054	0.653364	2.38476	5e-05	0.000273369	yes	XLOC_007036	Vdup1
XLOC_007038	ND	D	OK	72.8463	25.6711	-1.50471	-5.81991	5e-05	0.000273369	yes	XLOC_007038	rno
XLOC_007040	ND	D	OK	26.2658	20.5904	-0.35121	-1.58077	0.0054	0.0178161	yes	XLOC_007040	CG7028
XLOC_007045	ND	D	OK	166.316	61.7941	-1.42839	-5.48944	5e-05	0.000273369	yes	XLOC_007045	E(bx)
XLOC_007046	ND	D	OK	41.4623	22.4426	-0.885559	-3.69987	5e-05	0.000273369	yes	XLOC_007046	DIP2
XLOC_007051	ND	D	OK	74.1582	35.6877	-1.05518	-4.41197	5e-05	0.000273369	yes	XLOC_007051	fwd
XLOC_007057	ND	D	OK	15.1529	9.17619	-0.723629	-2.94163	5e-05	0.000273369	yes	XLOC_007057	CG6905
XLOC_007062	ND	D	OK	96.1026	53.5426	-0.84389	-3.04642	5e-05	0.000273369	yes	XLOC_007062	klar,snmRNA:438
XLOC_007065	ND	D	OK	2.77821	4.74091	0.77101	2.24257	0.00035	0.00161865	yes	XLOC_007065	CG17181
XLOC_007067	ND	D	OK	14.6164	28.6655	0.971724	3.25895	5e-05	0.000273369	yes	XLOC_007067	Reg-2
XLOC_007068	ND	D	OK	44.4419	31.5849	-0.492683	-1.99517	0.00045	0.00203564	yes	XLOC_007068	CG3402
XLOC_007072	ND	D	OK	20.082	15.7035	-0.354823	-1.54551	0.0077	0.0241103	yes	XLOC_007072	CG3371
XLOC_007073	ND	D	OK	27.0511	61.4208	1.18304	5.09383	5e-05	0.000273369	yes	XLOC_007073	CG3344
XLOC_007074	ND	D	OK	11.7581	19.4664	0.727334	2.62151	5e-05	0.000273369	yes	XLOC_007074	CG32483
XLOC_007096	ND	D	OK	46.7656	28.1831	-0.730614	-2.43569	5e-05	0.000273369	yes	XLOC_007096	trio
XLOC_007097	ND	D	OK	1.72627	0.834591	-1.04852	-2.36337	0.0001	0.000521172	yes	XLOC_007097	bab1
XLOC_007099	ND	D	OK	9.75792	7.42218	-0.394731	-1.70108	0.00285	0.0103675	yes	XLOC_007099	bab2
XLOC_007101	ND	D	OK	1.10947	3.77007	1.76473	1.8411	0.008	0.0248883	yes	XLOC_007101	LysX
XLOC_007103	ND	D	OK	32.7826	47.7555	0.542736	2.34407	5e-05	0.000273369	yes	XLOC_007103	CG9119
XLOC_007104	ND	D	OK	473.474	863.086	0.866219	3.45251	5e-05	0.000273369	yes	XLOC_007104	LysD
XLOC_007105	ND	D	OK	89.7853	125.895	0.487667	2.10664	0.0003	0.00140992	yes	XLOC_007105	LysP
XLOC_007107	ND	D	OK	24.436	12.6394	-0.951079	-4.07381	5e-05	0.000273369	yes	XLOC_007107	Klp61F
XLOC_007109	ND	D	OK	20.4335	11.8942	-0.780683	-2.06413	0.00085	0.00356227	yes	XLOC_007109	Psf1
XLOC_007117	ND	D	OK	78.3475	51.255	-0.612195	-2.51628	5e-05	0.000273369	yes	XLOC_007117	Ptp61F
XLOC_007122	ND	D	OK	27.5334	20.723	-0.40995	-1.83535	0.0016	0.00623883	yes	XLOC_007122	CG12084
XLOC_007136	ND	D	OK	23.3223	29.3025	0.329318	1.37577	0.01685	0.047234	yes	XLOC_007136	n-syb
XLOC_007141	ND	D	OK	61.9452	42.208	-0.553476	-1.93076	0.00095	0.00393422	yes	XLOC_007141	CG7971
XLOC_007152	ND	D	OK	5.97803	10.5389	0.817975	2.42811	5e-05	0.000273369	yes	XLOC_007152	CG18173
XLOC_007157	ND	D	OK	112.85	79.0838	-0.512948	-1.93276	0.00075	0.0031853	yes	XLOC_007157	alpha-Spec,dlt
XLOC_007160	ND	D	OK	10.5976	18.5408	0.806973	2.33446	0.00015	0.000751259	yes	XLOC_007160	Cpr62Bb
XLOC_007162	ND	D	OK	7.1011	16.5593	1.22153	3.60984	5e-05	0.000273369	yes	XLOC_007162	CG13936
XLOC_007165	ND	D	OK	61.6278	42.5322	-0.535026	-2.36258	0.00015	0.000751259	yes	XLOC_007165	dre4
XLOC_007169	ND	D	OK	12.7173	17.9642	0.498334	2.05354	0.0004	0.00182656	yes	XLOC_007169	CG5687
XLOC_007170	ND	D	OK	27.8448	18.3009	-0.60549	-2.37311	5e-05	0.000273369	yes	XLOC_007170	mu2
XLOC_007171	ND	D	OK	25.0116	14.1139	-0.825476	-3.62524	5e-05	0.000273369	yes	XLOC_007171	CG11814
XLOC_007172	ND	D	OK	18.8432	10.5776	-0.833033	-3.51238	5e-05	0.000273369	yes	XLOC_007172	CG5691
XLOC_007178	ND	D	OK	80.9672	46.7824	-0.791373	-2	0.00085	0.00356227	yes	XLOC_007178	sls
XLOC_007179	ND	D	OK	25.3913	19.8778	-0.353181	-1.47467	0.01025	0.0308748	yes	XLOC_007179	zormin
XLOC_007181	ND	D	OK	3.85048	6.73143	0.805874	2.006	0.0009	0.00375012	yes	XLOC_007181	CG15879
XLOC_007184	ND	D	OK	16.7056	12.3055	-0.441034	-1.47126	0.01135	0.0337077	yes	XLOC_007184	CG15820
XLOC_007185	ND	D	OK	21.9435	35.4878	0.69353	2.90585	5e-05	0.000273369	yes	XLOC_007185	CG5707
XLOC_007189	ND	D	OK	27.6699	19.193	-0.527737	-1.72426	0.00265	0.0097237	yes	XLOC_007189	oxt
XLOC_007191	ND	D	OK	41.5184	72.4951	0.804133	3.3014	5e-05	0.000273369	yes	XLOC_007191	yellow-g
XLOC_007199	ND	D	OK	79.572	27.2197	-1.54761	-6.23662	5e-05	0.000273369	yes	XLOC_007199	Spn
XLOC_007201	ND	D	OK	68.325	39.9422	-0.774499	-3.30519	5e-05	0.000273369	yes	XLOC_007201	msn
XLOC_007204	ND	D	OK	28.6065	64.1241	1.16452	4.24928	5e-05	0.000273369	yes	XLOC_007204	CG14949
XLOC_007208	ND	D	OK	2.36478	1.53295	-0.625402	-1.67125	0.00485	0.0162446	yes	XLOC_007208	CG12187
XLOC_007209	ND	D	OK	32.2653	12.4369	-1.37536	-5.91593	5e-05	0.000273369	yes	XLOC_007209	Mrtf
XLOC_007215	ND	D	OK	0.803351	1.56461	0.961702	1.61083	0.008	0.0248883	yes	XLOC_007215	spz5
XLOC_007236	ND	D	OK	9.60168	6.63463	-0.53327	-1.79833	0.0021	0.00789993	yes	XLOC_007236	CG14965
XLOC_007244	ND	D	OK	33.8945	14.3451	-1.24049	-2.72407	5e-05	0.000273369	yes	XLOC_007244	CG14967
XLOC_007250	ND	D	OK	10.5032	18.6471	0.828127	2.46818	5e-05	0.000273369	yes	XLOC_007250	CG14968
XLOC_007251	ND	D	OK	15.1437	10.9286	-0.470616	-1.39293	0.0159	0.0450189	yes	XLOC_007251	CG12077
XLOC_007258	ND	D	OK	76.2172	46.3868	-0.716402	-3.07142	5e-05	0.000273369	yes	XLOC_007258	eIF5B
XLOC_007264	ND	D	OK	31.2892	20.613	-0.602115	-2.70325	5e-05	0.000273369	yes	XLOC_007264	CG32264
XLOC_007270	ND	D	OK	130.183	46.3874	-1.48874	-2.35813	0.0006	0.00262067	yes	XLOC_007270	snRNA:U11
XLOC_007279	ND	D	OK	14.4983	21.8769	0.593524	1.58369	0.0082	0.0254248	yes	XLOC_007279	CG14984
XLOC_007280	ND	D	OK	3.3171	1.79602	-0.88512	-2.56567	5e-05	0.000273369	yes	XLOC_007280	CG12605
XLOC_007282	ND	D	OK	24.3305	18.2871	-0.411943	-1.81575	0.00195	0.00740708	yes	XLOC_007282	CG11593
XLOC_007285	ND	D	OK	9.17184	15.7503	0.780097	2.48134	5e-05	0.000273369	yes	XLOC_007285	Faa
XLOC_007286	ND	D	OK	8.85684	11.3829	0.362002	1.4289	0.01385	0.0400304	yes	XLOC_007286	Gad1
XLOC_007288	ND	D	OK	151.479	218.4	0.527852	2.29066	0.00015	0.000751259	yes	XLOC_007288	Chd64
XLOC_007289	ND	D	OK	104.817	72.6125	-0.52958	-2.19122	0.00015	0.000751259	yes	XLOC_007289	ens
XLOC_007303	ND	D	OK	45.851	62.4158	0.444959	1.97877	0.00055	0.00242421	yes	XLOC_007303	ImpL2
XLOC_007304	ND	D	OK	110.918	46.405	-1.25715	-5.21513	5e-05	0.000273369	yes	XLOC_007304	ago
XLOC_007319	ND	D	OK	0	2.94738	Inf	NA	5e-05	0.000273369	yes	XLOC_007319	CG15022
XLOC_007330	ND	D	OK	54.5755	28.9825	-0.913074	-4.08285	5e-05	0.000273369	yes	XLOC_007330	Src64B
XLOC_007333	ND	D	OK	13.8066	10.7101	-0.366378	-1.62581	0.00395	0.0136914	yes	XLOC_007333	axo
XLOC_007341	ND	D	OK	111.235	48.5679	-1.19554	-4.41083	5e-05	0.000273369	yes	XLOC_007341	CG18808,Dhc64C
XLOC_007354	ND	D	OK	39.7785	55.2749	0.474637	1.57112	0.0059	0.0192343	yes	XLOC_007354	CG10672
XLOC_007357	ND	D	OK	101.495	69.0604	-0.555472	-2.31914	5e-05	0.000273369	yes	XLOC_007357	shep
XLOC_007369	ND	D	OK	17.2927	23.8992	0.466802	1.8843	0.00115	0.00464858	yes	XLOC_007369	sinu
XLOC_007373	ND	D	OK	32.7182	109.174	1.73846	7.60686	5e-05	0.000273369	yes	XLOC_007373	CG10592
XLOC_007377	ND	D	OK	14.551	10.7644	-0.434858	-1.65544	0.00415	0.0142821	yes	XLOC_007377	Sse
XLOC_007378	ND	D	OK	65.9424	49.214	-0.422138	-1.90217	0.00085	0.00356227	yes	XLOC_007378	DnaJ-1
XLOC_007389	ND	D	OK	48.2556	23.009	-1.0685	-4.7094	5e-05	0.000273369	yes	XLOC_007389	Bre1
XLOC_007392	ND	D	OK	95.9548	65.5389	-0.550004	-1.70609	0.00375	0.0131147	yes	XLOC_007392	mad2
XLOC_007394	ND	D	OK	14.9548	10.6151	-0.494492	-1.69691	0.00345	0.0122385	yes	XLOC_007394	Pole2
XLOC_007399	ND	D	OK	112.743	88.6772	-0.346408	-1.4933	0.00905	0.0277129	yes	XLOC_007399	Bj1
XLOC_007401	ND	D	OK	7.84784	10.5437	0.426017	1.42501	0.0129	0.0376603	yes	XLOC_007401	CG10479
XLOC_007403	ND	D	OK	159.457	259.048	0.700048	3.14295	5e-05	0.000273369	yes	XLOC_007403	CG10477
XLOC_007404	ND	D	OK	27.2388	112.951	2.05197	8.11131	5e-05	0.000273369	yes	XLOC_007404	Jon65Ai
XLOC_007405	ND	D	OK	309.834	562.09	0.859303	3.65022	5e-05	0.000273369	yes	XLOC_007405	CG10472
XLOC_007407	ND	D	OK	38.1359	50.1809	0.395989	1.66311	0.0039	0.0135598	yes	XLOC_007407	CG10467,CG10469
XLOC_007420	ND	D	OK	0	1.34678	Inf	NA	5e-05	0.000273369	yes	XLOC_007420	CG13297
XLOC_007422	ND	D	OK	35.9607	27.5378	-0.385009	-1.73841	0.0028	0.010204	yes	XLOC_007422	CG10289
XLOC_007425	ND	D	OK	20.297	12.5604	-0.69239	-3.03849	5e-05	0.000273369	yes	XLOC_007425	D19A
XLOC_007427	ND	D	OK	31.9741	23.4663	-0.446314	-1.82361	0.0013	0.00518263	yes	XLOC_007427	LanA
XLOC_007433	ND	D	OK	10.0795	18.0963	0.844269	2.62365	5e-05	0.000273369	yes	XLOC_007433	CG10163
XLOC_007434	ND	D	OK	8.83565	19.6445	1.15271	3.79972	5e-05	0.000273369	yes	XLOC_007434	ImpL3
XLOC_007438	ND	D	OK	12.3671	9.05594	-0.449566	-1.86821	0.0012	0.00482187	yes	XLOC_007438	CG10144
XLOC_007444	ND	D	OK	23.6114	31.922	0.435069	1.93183	0.0009	0.00375012	yes	XLOC_007444	SP1173
XLOC_007445	ND	D	OK	7.32503	9.96123	0.44349	1.77482	0.00205	0.00773766	yes	XLOC_007445	ple
XLOC_007446	ND	D	OK	43.4922	18.5507	-1.22928	-5.03482	5e-05	0.000273369	yes	XLOC_007446	CG32394
XLOC_007447	ND	D	OK	53.4239	21.6886	-1.30055	-5.3707	5e-05	0.000273369	yes	XLOC_007447	dikar
XLOC_007448	ND	D	OK	58.6534	35.2471	-0.734708	-2.73516	5e-05	0.000273369	yes	XLOC_007448	CG10107
XLOC_007451	ND	D	OK	39.3821	64.1449	0.703794	3.16136	5e-05	0.000273369	yes	XLOC_007451	Prat2
XLOC_007458	ND	D	OK	77.8343	61.2388	-0.34596	-1.53241	0.0074	0.0233658	yes	XLOC_007458	G-ialpha65A
XLOC_007464	ND	D	OK	0	8.74343	Inf	NA	5e-05	0.000273369	yes	XLOC_007464	Cpr65Ea
XLOC_007467	ND	D	OK	0	0.710133	Inf	NA	0.0044	0.0149999	yes	XLOC_007467	CG8629
XLOC_007470	ND	D	OK	6.32784	4.35262	-0.539828	-1.49188	0.00965	0.0292499	yes	XLOC_007470	CG42256
XLOC_007474	ND	D	OK	33.8552	19.0943	-0.826232	-3.70845	5e-05	0.000273369	yes	XLOC_007474	Cdc27
XLOC_007476	ND	D	OK	10.5492	16.7757	0.669248	2.42908	5e-05	0.000273369	yes	XLOC_007476	CG14830
XLOC_007477	ND	D	OK	1.5843	0.973741	-0.70224	-1.71098	0.00375	0.0131147	yes	XLOC_007477	unc-13-4A
XLOC_007478	ND	D	OK	20.4397	15.6943	-0.381136	-1.40204	0.0149	0.0425798	yes	XLOC_007478	RhoGEF4
XLOC_007481	ND	D	OK	43.072	23.3877	-0.881001	-3.96491	5e-05	0.000273369	yes	XLOC_007481	eco
XLOC_007483	ND	D	OK	26.1152	50.0294	0.937887	3.80234	5e-05	0.000273369	yes	XLOC_007483	CG14834
XLOC_007485	ND	D	OK	19.8354	14.1242	-0.489913	-1.6403	0.00425	0.0145571	yes	XLOC_007485	CTCF
XLOC_007486	ND	D	OK	132.037	211.27	0.678154	2.8543	5e-05	0.000273369	yes	XLOC_007486	pst
XLOC_007487	ND	D	OK	55.7504	73.2928	0.394689	1.7602	0.00225	0.00840497	yes	XLOC_007487	Sh3beta
XLOC_007490	ND	D	OK	73.135	107.674	0.558032	2.5182	5e-05	0.000273369	yes	XLOC_007490	CG8560
XLOC_007496	ND	D	OK	6.28095	8.78395	0.483888	1.44277	0.01245	0.036557	yes	XLOC_007496	Cyp4d8
XLOC_007497	ND	D	OK	19.3646	26.0093	0.425607	1.66927	0.00415	0.0142821	yes	XLOC_007497	CG8539
XLOC_007516	ND	D	OK	40.1713	26.4488	-0.602967	-2.65149	5e-05	0.000273369	yes	XLOC_007516	pbl
XLOC_007518	ND	D	OK	22.1106	14.628	-0.596004	-2.66353	5e-05	0.000273369	yes	XLOC_007518	syd
XLOC_007520	ND	D	OK	84.7136	56.1251	-0.593947	-2.39358	0.0001	0.000521172	yes	XLOC_007520	HP4
XLOC_007523	ND	D	OK	36.0718	25.8406	-0.481231	-2.05643	0.0003	0.00140992	yes	XLOC_007523	bip1
XLOC_007537	ND	D	OK	25.0531	11.4349	-1.13154	-3.13599	5e-05	0.000273369	yes	XLOC_007537	CG7504
XLOC_007541	ND	D	OK	31.5654	14.0782	-1.16488	-5.17764	5e-05	0.000273369	yes	XLOC_007541	RecQ4
XLOC_007552	ND	D	OK	0.590696	1.50917	1.35326	1.84497	0.00375	0.0131147	yes	XLOC_007552	CG7201
XLOC_007554	ND	D	OK	5.37512	8.69866	0.694495	1.78135	0.0033	0.0117681	yes	XLOC_007554	CG7194
XLOC_007556	ND	D	OK	142.445	184.225	0.371062	1.67274	0.00315	0.0112808	yes	XLOC_007556	CG7188
XLOC_007557	ND	D	OK	81.252	60.3822	-0.42828	-1.87881	0.00135	0.00535669	yes	XLOC_007557	CG7185
XLOC_007558	ND	D	OK	68.7085	54.2412	-0.341099	-1.53849	0.0082	0.0254248	yes	XLOC_007558	CG7182
XLOC_007563	ND	D	OK	15.7121	10.0213	-0.648796	-2.37201	5e-05	0.000273369	yes	XLOC_007563	Oseg1
XLOC_007565	ND	D	OK	126.62	57.2488	-1.14519	-4.79034	5e-05	0.000273369	yes	XLOC_007565	Unr
XLOC_007566	ND	D	OK	100.403	34.7295	-1.53157	-6.49144	5e-05	0.000273369	yes	XLOC_007566	CR32028
XLOC_007568	ND	D	OK	1.95116	0.884498	-1.1414	-3.16231	5e-05	0.000273369	yes	XLOC_007568	CG6915
XLOC_007578	ND	D	OK	34.1131	15.7357	-1.11628	-1.91817	0.00395	0.0136914	yes	XLOC_007578	Cdc6
XLOC_007580	ND	D	OK	212.664	288.101	0.438002	1.83598	0.00105	0.00429572	yes	XLOC_007580	Arr2
XLOC_007583	ND	D	OK	40.6721	51.9652	0.353509	1.54895	0.00755	0.0237212	yes	XLOC_007583	Prm
XLOC_007588	ND	D	OK	21.2565	39.2245	0.883847	2.32372	0.0002	0.000976131	yes	XLOC_007588	CG32023
XLOC_007592	ND	D	OK	15.344	8.7679	-0.807367	-3.42067	5e-05	0.000273369	yes	XLOC_007592	CG5741
XLOC_007593	ND	D	OK	15.0577	7.89653	-0.931208	-3.74761	5e-05	0.000273369	yes	XLOC_007593	orb2
XLOC_007598	ND	D	OK	68.9054	97.0616	0.494283	2.2199	0.0001	0.000521172	yes	XLOC_007598	CG5288
XLOC_007600	ND	D	OK	454.167	203.093	-1.16108	-4.33277	5e-05	0.000273369	yes	XLOC_007600	smg
XLOC_007601	ND	D	OK	63.249	44.3328	-0.512669	-2.1973	0.00015	0.000751259	yes	XLOC_007601	CG5194
XLOC_007603	ND	D	OK	298.586	389.742	0.384376	1.5297	0.00835	0.0258031	yes	XLOC_007603	Argk
XLOC_007604	ND	D	OK	94.3024	70.1755	-0.426327	-1.92914	0.00065	0.00281122	yes	XLOC_007604	CG4911
XLOC_007605	ND	D	OK	23.1215	16.4348	-0.492483	-2.00085	0.00035	0.00161865	yes	XLOC_007605	bol
XLOC_007607	ND	D	OK	4.67775	3.18558	-0.554256	-1.60669	0.00555	0.0182457	yes	XLOC_007607	Rdl
XLOC_007611	ND	D	OK	22.0809	13.3473	-0.726254	-2.64754	5e-05	0.000273369	yes	XLOC_007611	Klp67A
XLOC_007613	ND	D	OK	0.312	2.15718	2.78953	1.89462	0.0173	0.0483485	yes	XLOC_007613	Hsp67Bc
XLOC_007614	ND	D	OK	763.553	580.928	-0.394368	-1.59849	0.0051	0.0169365	yes	XLOC_007614	Hsp26
XLOC_007616	ND	D	OK	33.5059	24.8244	-0.432655	-1.93655	0.0011	0.00447501	yes	XLOC_007616	CG4080
XLOC_007626	ND	D	OK	52.3298	26.6354	-0.974287	-4.33388	5e-05	0.000273369	yes	XLOC_007626	phol
XLOC_007634	ND	D	OK	26.885	20.4253	-0.396442	-1.68165	0.0035	0.0123856	yes	XLOC_007634	CG3408
XLOC_007642	ND	D	OK	54.4015	41.098	-0.404577	-1.60426	0.0058	0.0189509	yes	XLOC_007642	CG3088
XLOC_007649	ND	D	OK	22.202	17.3916	-0.352294	-1.46065	0.01125	0.0334499	yes	XLOC_007649	nbs
XLOC_007657	ND	D	OK	9.69631	6.7314	-0.526529	-1.61127	0.00505	0.0168035	yes	XLOC_007657	Cdk8
XLOC_007658	ND	D	OK	41.4882	17.561	-1.24032	-5.50976	5e-05	0.000273369	yes	XLOC_007658	Gap1
XLOC_007659	ND	D	OK	17.893	14.1334	-0.340284	-1.38125	0.01605	0.0453297	yes	XLOC_007659	CG10809
XLOC_007661	ND	D	OK	13.2715	9.2173	-0.525919	-2.22579	0.0001	0.000521172	yes	XLOC_007661	Taf2
XLOC_007666	ND	D	OK	2.49126	4.05073	0.701308	1.56954	0.00795	0.0247632	yes	XLOC_007666	CG14160
XLOC_007667	ND	D	OK	1.78279	3.34617	0.908377	1.64756	0.00715	0.0226681	yes	XLOC_007667	CG32053
XLOC_007669	ND	D	OK	11.3342	17.1355	0.596305	2.07179	0.0004	0.00182656	yes	XLOC_007669	CG6640
XLOC_007673	ND	D	OK	1.6055	3.97031	1.30623	3.13033	5e-05	0.000273369	yes	XLOC_007673	ect
XLOC_007680	ND	D	OK	19.4653	11.5913	-0.747861	-3.24114	5e-05	0.000273369	yes	XLOC_007680	Gem3
XLOC_007682	ND	D	OK	103.749	136.989	0.400968	1.62464	0.00615	0.0199658	yes	XLOC_007682	CG42521
XLOC_007687	ND	D	OK	45.1074	34.5953	-0.382788	-1.66436	0.00455	0.0154232	yes	XLOC_007687	CG32066
XLOC_007688	ND	D	OK	44.3668	93.1156	1.06954	2.83254	5e-05	0.000273369	yes	XLOC_007688	CG33493
XLOC_007689	ND	D	OK	125.02	163.721	0.389086	1.71831	0.0024	0.00889974	yes	XLOC_007689	CG6463
XLOC_007690	ND	D	OK	9.46098	14.2012	0.585956	1.61716	0.00725	0.022935	yes	XLOC_007690	NijA
XLOC_007691	ND	D	OK	13.8846	10.4728	-0.406834	-1.68901	0.0029	0.0105192	yes	XLOC_007691	CG6418
XLOC_007692	ND	D	OK	494.521	643.979	0.38098	1.5196	0.0088	0.0270371	yes	XLOC_007692	CG6409
XLOC_007694	ND	D	OK	159.695	123.458	-0.371296	-1.55641	0.00715	0.0226681	yes	XLOC_007694	Aps
XLOC_007695	ND	D	OK	2.91548	2.10688	-0.468623	-1.37198	0.0168	0.047146	yes	XLOC_007695	klu
XLOC_007704	ND	D	OK	45.3694	20.1546	-1.17061	-5.08666	5e-05	0.000273369	yes	XLOC_007704	JIL-1
XLOC_007712	ND	D	OK	44.5819	30.0677	-0.568242	-2.56732	5e-05	0.000273369	yes	XLOC_007712	Mnf
XLOC_007716	ND	D	OK	50.8275	37.2982	-0.446505	-1.69146	0.0033	0.0117681	yes	XLOC_007716	wls
XLOC_007719	ND	D	OK	32.0715	19.2313	-0.737831	-3.31085	5e-05	0.000273369	yes	XLOC_007719	As
XLOC_007721	ND	D	OK	28.4225	20.301	-0.485487	-2.17929	0.00035	0.00161865	yes	XLOC_007721	CG6175
XLOC_007736	ND	D	OK	13.2662	7.86889	-0.753519	-2.96317	5e-05	0.000273369	yes	XLOC_007736	rt
XLOC_007742	ND	D	OK	2.19757	3.65	0.731984	1.43679	0.01595	0.0451227	yes	XLOC_007742	CG6083
XLOC_007755	ND	D	OK	46.0957	24.3809	-0.918884	-2.94283	5e-05	0.000273369	yes	XLOC_007755	Pi3K68D
XLOC_007757	ND	D	OK	4.05149	8.70716	1.10375	2.87719	5e-05	0.000273369	yes	XLOC_007757	CG10361
XLOC_007759	ND	D	OK	4.05773	2.64834	-0.615588	-2.49131	0.0001	0.000521172	yes	XLOC_007759	CG42255
XLOC_007762	ND	D	OK	360.389	276.774	-0.380847	-1.49747	0.00925	0.0282401	yes	XLOC_007762	CycA
XLOC_007775	ND	D	OK	44.3098	124.685	1.49259	5.78882	5e-05	0.000273369	yes	XLOC_007775	CG42397
XLOC_007777	ND	D	OK	9.52683	6.48535	-0.554811	-2.27027	0.0001	0.000521172	yes	XLOC_007777	Grip163
XLOC_007789	ND	D	OK	31.5147	41.7321	0.405132	1.67619	0.0034	0.0120823	yes	XLOC_007789	Adk1
XLOC_007791	ND	D	OK	32.7273	19.5234	-0.74529	-3.33712	5e-05	0.000273369	yes	XLOC_007791	app
XLOC_007792	ND	D	OK	14.4425	19.6315	0.442848	1.58603	0.00485	0.0162446	yes	XLOC_007792	Pbgs
XLOC_007805	ND	D	OK	5.7879	10.6895	0.885087	2.79832	5e-05	0.000273369	yes	XLOC_007805	CG10660
XLOC_007806	ND	D	OK	4.66066	6.96697	0.579996	1.54788	0.00855	0.0263649	yes	XLOC_007806	CG10657
XLOC_007810	ND	D	OK	32.0052	9.67757	-1.72559	-7.56048	5e-05	0.000273369	yes	XLOC_007810	sti
XLOC_007817	ND	D	OK	130.225	104.145	-0.32242	-1.44251	0.01185	0.0350285	yes	XLOC_007817	snRNP69D
XLOC_007823	ND	D	OK	48.5904	28.7931	-0.754945	-2.85651	5e-05	0.000273369	yes	XLOC_007823	Atg1
XLOC_007827	ND	D	OK	0.67412	1.41644	1.0712	1.66031	0.00695	0.0221378	yes	XLOC_007827	CG32107
XLOC_007828	ND	D	OK	5.92074	12.7639	1.10822	2.88588	5e-05	0.000273369	yes	XLOC_007828	CG10943
XLOC_007836	ND	D	OK	29.2509	21.396	-0.451139	-2.03958	0.0003	0.00140992	yes	XLOC_007836	MICAL-like
XLOC_007838	ND	D	OK	70.5738	105.839	0.584663	2.61205	5e-05	0.000273369	yes	XLOC_007838	CG11255
XLOC_007848	ND	D	OK	19.6514	13.824	-0.507457	-1.84694	0.00105	0.00429572	yes	XLOC_007848	CG10191
XLOC_007850	ND	D	OK	15.3195	10.1724	-0.590704	-1.69414	0.00375	0.0131147	yes	XLOC_007850	CG10222
XLOC_007854	ND	D	OK	7.74318	12.525	0.693817	1.40581	0.01785	0.0497075	yes	XLOC_007854	CG14105
XLOC_007857	ND	D	OK	0.752951	2.95036	1.97027	2.57514	0.00015	0.000751259	yes	XLOC_007857	CG10154
XLOC_007858	ND	D	OK	0.345864	1.79305	2.37414	1.72	0.00345	0.0122385	yes	XLOC_007858	CG10140
XLOC_007860	ND	D	OK	21.092	33.3172	0.659573	1.90456	0.0013	0.00518263	yes	XLOC_007860	CG10116
XLOC_007862	ND	D	OK	37.9886	28.8587	-0.39656	-1.78728	0.0024	0.00889974	yes	XLOC_007862	CG10083
XLOC_007865	ND	D	OK	5.05143	2.68343	-0.912611	-2.49652	5e-05	0.000273369	yes	XLOC_007865	bru-3
XLOC_007869	ND	D	OK	69.4192	150.92	1.12037	2.92809	5e-05	0.000273369	yes	XLOC_007869	CG8745
XLOC_007872	ND	D	OK	16.7658	11.3558	-0.562096	-2.45057	5e-05	0.000273369	yes	XLOC_007872	Rgl
XLOC_007873	ND	D	OK	9.53958	5.6996	-0.743066	-2.80424	5e-05	0.000273369	yes	XLOC_007873	CG8833
XLOC_007879	ND	D	OK	39.2004	13.291	-1.56042	-6.56084	5e-05	0.000273369	yes	XLOC_007879	ptip
XLOC_007880	ND	D	OK	241.937	188.029	-0.363678	-1.46397	0.0112	0.0333207	yes	XLOC_007880	endos
XLOC_007882	ND	D	OK	11.3084	7.24669	-0.642004	-2.78555	5e-05	0.000273369	yes	XLOC_007882	blue
XLOC_007891	ND	D	OK	90.3356	140.258	0.634713	2.87009	5e-05	0.000273369	yes	XLOC_007891	CG3868
XLOC_007892	ND	D	OK	17.1745	10.2909	-0.7389	-3.15879	5e-05	0.000273369	yes	XLOC_007892	stwl
XLOC_007899	ND	D	OK	21.7215	15.588	-0.478694	-1.57326	0.00875	0.0268917	yes	XLOC_007899	RecQ5
XLOC_007907	ND	D	OK	53.5365	29.1261	-0.878209	-3.7905	5e-05	0.000273369	yes	XLOC_007907	mop
XLOC_007908	ND	D	OK	35.7908	46.3044	0.371558	1.68074	0.00335	0.0119255	yes	XLOC_007908	bmm
XLOC_007910	ND	D	OK	248.695	160.351	-0.633146	-2.82239	5e-05	0.000273369	yes	XLOC_007910	gnu
XLOC_007913	ND	D	OK	0	2.07673	Inf	NA	5e-05	0.000273369	yes	XLOC_007913	BobA
XLOC_007924	ND	D	OK	33.6653	18.1187	-0.893783	-3.32202	5e-05	0.000273369	yes	XLOC_007924	cp309
XLOC_007926	ND	D	OK	10.9184	7.37667	-0.565723	-2.21779	5e-05	0.000273369	yes	XLOC_007926	CG6945
XLOC_007929	ND	D	OK	30.8999	14.7162	-1.07019	-4.73724	5e-05	0.000273369	yes	XLOC_007929	CG12316
XLOC_007933	ND	D	OK	47.4698	25.5417	-0.894154	-3.9342	5e-05	0.000273369	yes	XLOC_007933	Msh6
XLOC_007942	ND	D	OK	40.1625	79.8923	0.992209	3.84688	5e-05	0.000273369	yes	XLOC_007942	mex1
XLOC_007951	ND	D	OK	19.801	10.1896	-0.958473	-3.02904	5e-05	0.000273369	yes	XLOC_007951	CG7650
XLOC_007963	ND	D	OK	4.74151	10.9072	1.20186	3.45168	5e-05	0.000273369	yes	XLOC_007963	comm2
XLOC_007965	ND	D	OK	81.3897	103.418	0.345567	1.38596	0.01575	0.044669	yes	XLOC_007965	CG6151
XLOC_007966	ND	D	OK	66.8376	35.5926	-0.909083	-3.96477	5e-05	0.000273369	yes	XLOC_007966	Dcp2
XLOC_007973	ND	D	OK	4.19611	2.64449	-0.666061	-2.37561	0.0001	0.000521172	yes	XLOC_007973	CG6114
XLOC_007975	ND	D	OK	52.5922	23.5966	-1.15627	-4.98152	5e-05	0.000273369	yes	XLOC_007975	CG5931
XLOC_007976	ND	D	OK	77.8805	29.1295	-1.41878	-4.30355	5e-05	0.000273369	yes	XLOC_007976	brm
XLOC_007977	ND	D	OK	31.1796	17.4113	-0.84058	-2.68143	5e-05	0.000273369	yes	XLOC_007977	DNApol-delta
XLOC_007979	ND	D	OK	34.2332	23.311	-0.554388	-2.06981	0.00055	0.00242421	yes	XLOC_007979	mib1
XLOC_007980	ND	D	OK	84.1569	105.744	0.329428	1.46045	0.01065	0.0318997	yes	XLOC_007980	th
XLOC_007981	ND	D	OK	29.7442	21.3689	-0.477094	-1.91132	0.001	0.00411942	yes	XLOC_007981	Taspase1
XLOC_007982	ND	D	OK	17.8487	13.9925	-0.351162	-1.49444	0.00885	0.0271743	yes	XLOC_007982	CG5235
XLOC_007989	ND	D	OK	56.558	34.93	-0.695264	-2.82772	5e-05	0.000273369	yes	XLOC_007989	CG32152,CG5151
XLOC_008003	ND	D	OK	0	2.19025	Inf	NA	5e-05	0.000273369	yes	XLOC_008003	CG13049
XLOC_008008	ND	D	OK	3.38622	7.3436	1.11681	1.95811	0.00185	0.00708026	yes	XLOC_008008	CG4962
XLOC_008017	ND	D	OK	106.427	162.273	0.60856	2.53278	5e-05	0.000273369	yes	XLOC_008017	Pdh
XLOC_008018	ND	D	OK	21.0469	31.3318	0.57402	2.14549	0.0002	0.000976131	yes	XLOC_008018	CG4893
XLOC_008020	ND	D	OK	6.75368	12.0237	0.83213	2.8542	5e-05	0.000273369	yes	XLOC_008020	Cpr72Ec
XLOC_008021	ND	D	OK	35.5656	24.4907	-0.538248	-2.43792	5e-05	0.000273369	yes	XLOC_008021	roq
XLOC_008023	ND	D	OK	92.8589	131.888	0.506206	2.21526	0.0002	0.000976131	yes	XLOC_008023	CG4729
XLOC_008034	ND	D	OK	39.2974	51.6361	0.393947	1.77098	0.0014	0.00553775	yes	XLOC_008034	Mipp1
XLOC_008036	ND	D	OK	69.2356	55.307	-0.324051	-1.39177	0.0162	0.0457025	yes	XLOC_008036	Smn
XLOC_008038	ND	D	OK	67.0706	39.6039	-0.760039	-2.35239	0.0001	0.000521172	yes	XLOC_008038	spd-2,tra
XLOC_008044	ND	D	OK	53.2891	19.8293	-1.4262	-6.01476	5e-05	0.000273369	yes	XLOC_008044	Abl
XLOC_008045	ND	D	OK	84.2566	114.315	0.440157	1.89394	0.0012	0.00482187	yes	XLOC_008045	Baldspot
XLOC_008046	ND	D	OK	6.88881	9.93681	0.528528	1.77173	0.00215	0.00806707	yes	XLOC_008046	Galpha73B
XLOC_008048	ND	D	OK	36.3262	24.4006	-0.574093	-2.44558	0.0001	0.000521172	yes	XLOC_008048	Lasp
XLOC_008049	ND	D	OK	4.06507	12.4106	1.61022	2.74048	0.0001	0.000521172	yes	XLOC_008049	CG13026
XLOC_008050	ND	D	OK	22.4338	39.1601	0.803708	2.532	5e-05	0.000273369	yes	XLOC_008050	PGRP-SB1
XLOC_008052	ND	D	OK	21.2075	12.9969	-0.706414	-2.21424	0.0002	0.000976131	yes	XLOC_008052	CG13025
XLOC_008054	ND	D	OK	117.426	66.2778	-0.825158	-3.1999	5e-05	0.000273369	yes	XLOC_008054	CG9674
XLOC_008057	ND	D	OK	18.3921	30.1887	0.71492	1.48248	0.0112	0.0333207	yes	XLOC_008057	Rh4
XLOC_008062	ND	D	OK	33.2328	15.904	-1.06322	-4.72392	5e-05	0.000273369	yes	XLOC_008062	CG3764
XLOC_008063	ND	D	OK	40.2264	31.1404	-0.369355	-1.66697	0.00415	0.0142821	yes	XLOC_008063	CG6664
XLOC_008066	ND	D	OK	134.695	66.2127	-1.02452	-3.17355	5e-05	0.000273369	yes	XLOC_008066	CG14059
XLOC_008069	ND	D	OK	16.899	10.4829	-0.688902	-2.49766	5e-05	0.000273369	yes	XLOC_008069	Rbp6
XLOC_008075	ND	D	OK	37.6365	25.3603	-0.569562	-2.474	5e-05	0.000273369	yes	XLOC_008075	CG6479
XLOC_008080	ND	D	OK	7.4613	5.83386	-0.354975	-1.49059	0.00955	0.0289728	yes	XLOC_008080	Cad74A
XLOC_008081	ND	D	OK	0.109339	0.71953	2.71824	2.67	0.00115	0.00464858	yes	XLOC_008081	CG13728
XLOC_008083	ND	D	OK	48.7028	26.9481	-0.853823	-3.40578	5e-05	0.000273369	yes	XLOC_008083	blot
XLOC_008091	ND	D	OK	24.1525	13.8821	-0.798945	-3.3038	5e-05	0.000273369	yes	XLOC_008091	U4-U6-60K
XLOC_008092	ND	D	OK	39.8795	24.221	-0.719389	-3.25759	5e-05	0.000273369	yes	XLOC_008092	Edc3
[truncated: 1,647 more rows]

[truncated: 1 more sheets: Overlaps]
